# Supplementary material for: Redox-Triggered Switching of Conformational State in Triple-Decker Lanthanide Phthalocyaninates
Source: MDPI journal article supplement (doi:10.3390/molecules27196498), 2022-10-01
Supplement: s1 [file s1]

# Redox-Triggered Switching of Conformational State in Triple-Decker Lanthanide Phthalocyaninates

Alexander G. Martynov <sup>1,\*</sup>, Marina A. Polovkova <sup>1</sup>, Yulia G. Gorbunova <sup>1,2,\*</sup>,  
Aslan Yu. Tsivadze <sup>1,2</sup>

<sup>1</sup> A.N. Frumkin Institute of Physical Chemistry and Electrochemistry,  
Russian Academy of Sciences, Leninsky pr., 31, Bldg. 4, Moscow,  
119071, Russia

<sup>2</sup> N.S. Kurnakov Institute of General and Inorganic Chemistry, Russian  
Academy of Sciences, Leninsky pr., 31, Moscow, 119991, Russia

\* Correspondence: martynov@phych.ea.ru (A.G.M.) , yulia@igic.ras.ru  
(Y.G.G.)

## ELECTRONIC SUPPORTING INFORMATION

|                                                                                                                                                                                                                                               |    |
|-----------------------------------------------------------------------------------------------------------------------------------------------------------------------------------------------------------------------------------------------|----|
| <b>Figure S1.</b> MALDI TOF mass-spectrum of $\text{Tb}_2[(\text{BuO})_8\text{Pc}]_3$ .                                                                                                                                                       | 3  |
| <b>Figure S2.</b> $^1\text{H}$ -NMR spectrum of $\text{Tb}_2[(\text{BuO})_8\text{Pc}]_3$ in $\text{CDCl}_3$ .                                                                                                                                 | 3  |
| <b>Figure S3.</b> MALDI TOF mass-spectrum of $\text{Tb}_2[(15\text{C}5)_4\text{Pc}]_3$ .                                                                                                                                                      | 4  |
| <b>Figure S4.</b> $^1\text{H}$ -NMR spectrum of $\text{Tb}_2[(15\text{C}5)_4\text{Pc}]_3$ in $\text{CDCl}_3$ .                                                                                                                                | 4  |
| <b>Figure S5.</b> MALDI TOF mass-spectrum of $\text{Y}_2[(\text{BuO})_8\text{Pc}]_3$ .                                                                                                                                                        | 5  |
| <b>Figure S6.</b> $^1\text{H}$ -NMR spectrum of $\text{Y}_2[(\text{BuO})_8\text{Pc}]_3$ in $\text{CDCl}_3$ .                                                                                                                                  | 5  |
| <b>Figure S7.</b> MALDI TOF mass-spectrum of $\text{Y}_2[(15\text{C}5)_4\text{Pc}]_3$ .                                                                                                                                                       | 6  |
| <b>Figure S8.</b> $^1\text{H}$ -NMR spectrum of $\text{Y}_2[(15\text{C}5)_4\text{Pc}]_3$ in $\text{CDCl}_3$ .                                                                                                                                 | 6  |
| <b>Figure S9.</b> UV-vis-NIR spectra of neutral forms of $\text{Y}_2[(\text{BuO})_8\text{Pc}]_3$ and $\text{Y}_2[(15\text{C}5)_4\text{Pc}]_3$ and their mono- and dicationic forms, obtained by 1e- and 2e-oxidation with $\text{OxSbCl}_6$ . | 7  |
| <b>Table S1.</b> The calculated UV-vis-NIR absorption spectrum of $s\text{-Y}_2[(\text{MeO})_8\text{Pc}]_3$ for the BP86/def2-SVP geometry calculated by the sTDA method at the CAM-B3LYP/6-31G(d) level of theory.                           | 8  |
| <b>Table S2.</b> The calculated UV-vis-NIR absorption spectrum of $s\text{-Y}_2[(\text{MeO})_8\text{Pc}]_3^+$ for the BP86/def2-SVP geometry calculated by the sTDA method at the CAM-B3LYP/6-31G(d) level of theory.                         | 9  |
| <b>Table S3.</b> The calculated UV-vis-NIR absorption spectrum of $s\text{-Y}_2[(\text{MeO})_8\text{Pc}]_3^{2+}$ for the BP86/def2-SVP geometry calculated by the sTDA method at the CAM-B3LYP/6-31G(d) level of theory.                      | 11 |
| <b>Table S4.</b> The calculated UV-vis-NIR absorption spectrum of $g\text{-Y}_2[(\text{MeO})_8\text{Pc}]_3$ for the BP86/def2-SVP geometry calculated by the sTDA method at the CAM-B3LYP/6-31G(d) level of theory.                           | 12 |
| <b>Table S5.</b> The calculated UV-vis-NIR absorption spectrum of $g\text{-Y}_2[(\text{MeO})_8\text{Pc}]_3^+$ for the BP86/def2-SVP geometry calculated by the sTDA method at the CAM-B3LYP/6-31G(d) level of theory.                         | 13 |

|                                                                                                                                                                                                                               |    |
|-------------------------------------------------------------------------------------------------------------------------------------------------------------------------------------------------------------------------------|----|
| <b>Table S6.</b> The calculated UV-vis-NIR absorption spectrum of $g\text{-Y}_2[(\text{MeO})_8\text{Pc}]_3^{2+}$ for the BP86/def2-SVP geometry calculated by the sTDA method at the CAM-B3LYP/6-31G(d) level of theory. .... | 16 |
| <b>Figure S10.</b> RDG vs. $\text{sign}(\lambda_2)\rho$ plots for staggered and gauche conformations of redox-forms of $\text{Y}_2[(\text{MeO})_8\text{Pc}]_3$ .....                                                          | 18 |
| <b>Table S7.</b> BP86/def2-SVP geometry of $s\text{-Y}_2[(\text{MeO})_8\text{Pc}]_3$ .....                                                                                                                                    | 19 |
| <b>Table S8.</b> BP86/def2-SVP geometry of $s\text{-Y}_2[(\text{MeO})_8\text{Pc}]_3^+$ .....                                                                                                                                  | 21 |
| <b>Table S9.</b> BP86/def2-SVP geometry of $s\text{-Y}_2[(\text{MeO})_8\text{Pc}]_3^{2+}$ .....                                                                                                                               | 23 |
| <b>Table S10.</b> BP86/def2-SVP geometry of $g\text{-Y}_2[(\text{MeO})_8\text{Pc}]_3$ .....                                                                                                                                   | 25 |
| <b>Table S11.</b> BP86/def2-SVP geometry of $g\text{-Y}_2[(\text{MeO})_8\text{Pc}]_3^+$ .....                                                                                                                                 | 27 |
| <b>Table S12.</b> BP86/def2-SVP geometry of $g\text{-Y}_2[(\text{MeO})_8\text{Pc}]_3^{2+}$ . ....                                                                                                                             | 29 |

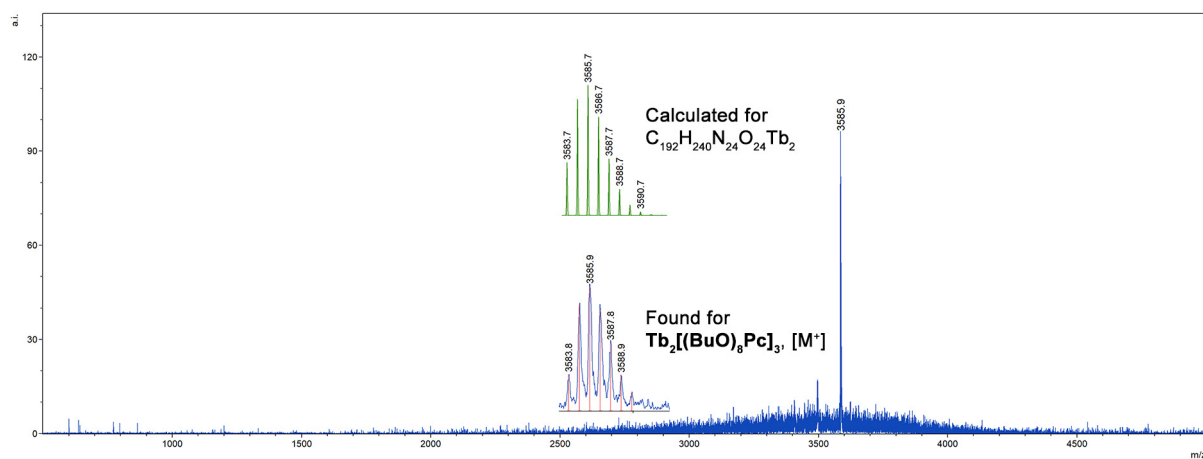

Figure S1. MALDI TOF mass-spectrum of  $\text{Tb}_2[(\text{BuO})_8\text{Pc}]_3$ .

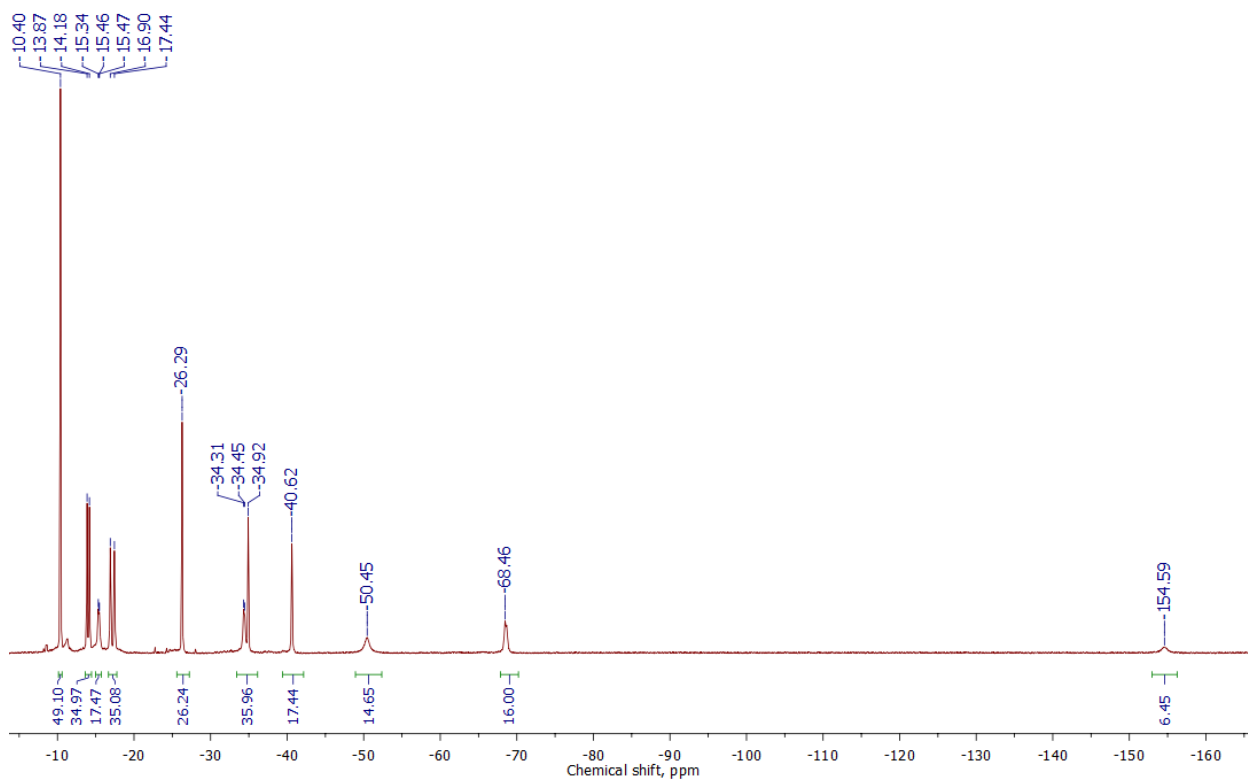

Figure S2.  $^1\text{H}$ -NMR spectrum of  $\text{Tb}_2[(\text{BuO})_8\text{Pc}]_3$  in  $\text{CDCl}_3$ .

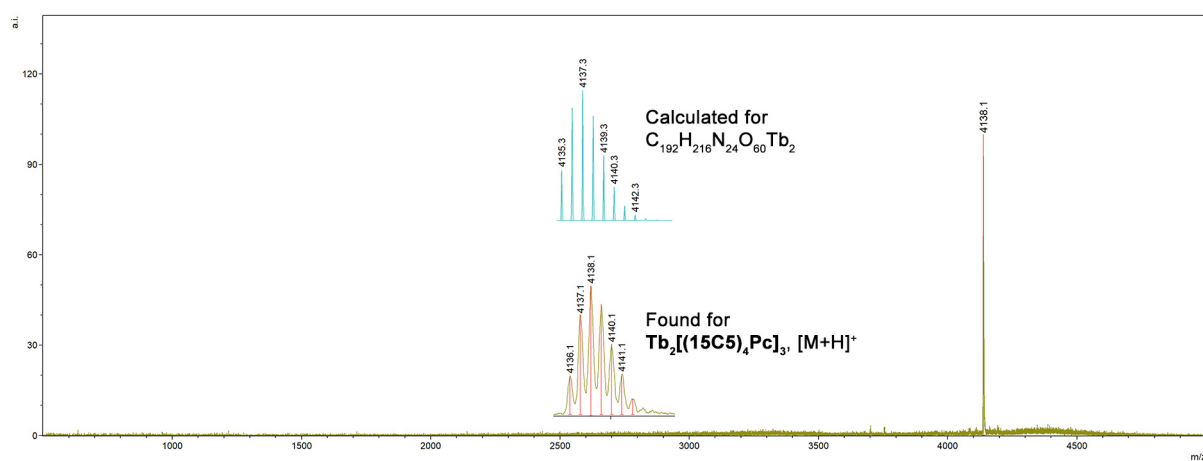

Figure S3. MALDI TOF mass-spectrum of  $Tb_2[(15C5)_4Pc]_3$

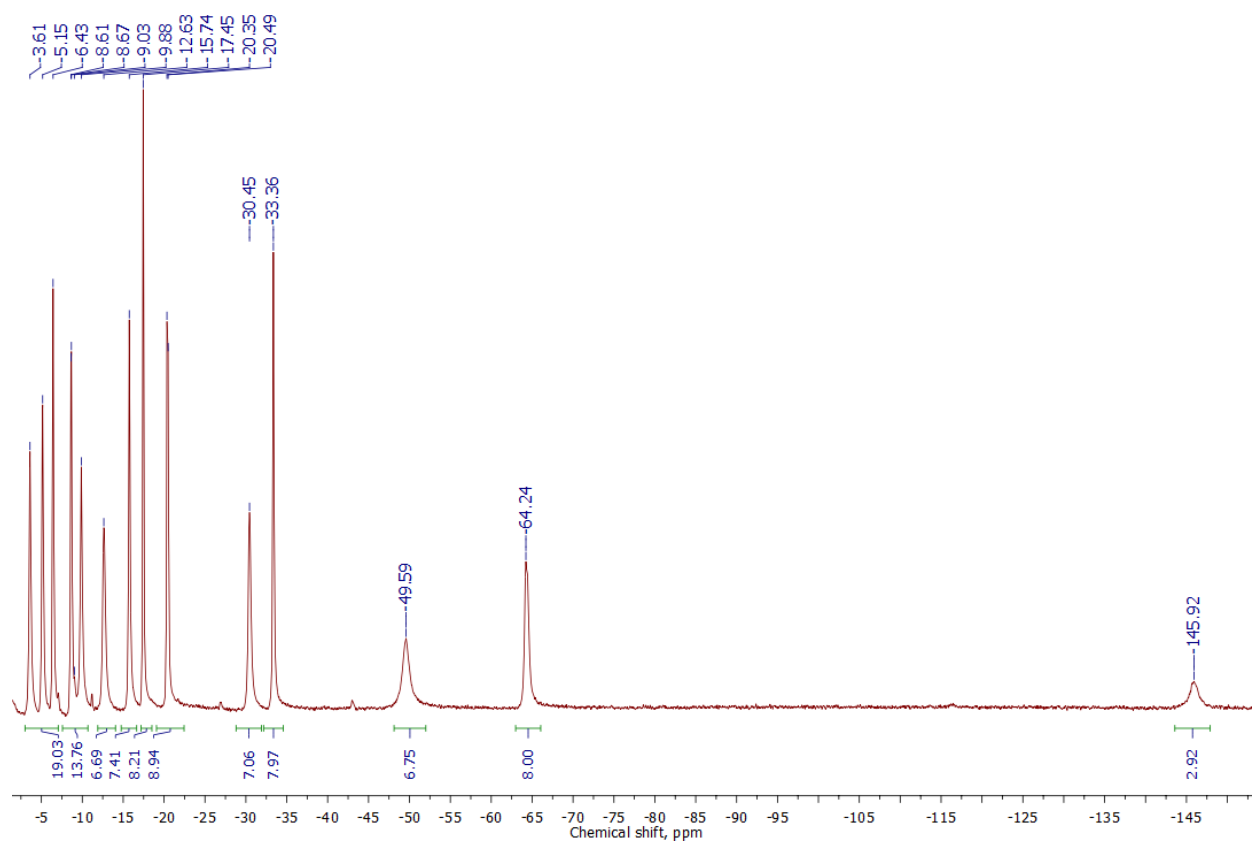

Figure S4.  $^1H$ -NMR spectrum of  $Tb_2[(15C5)_4Pc]_3$  in  $CDCl_3$ .

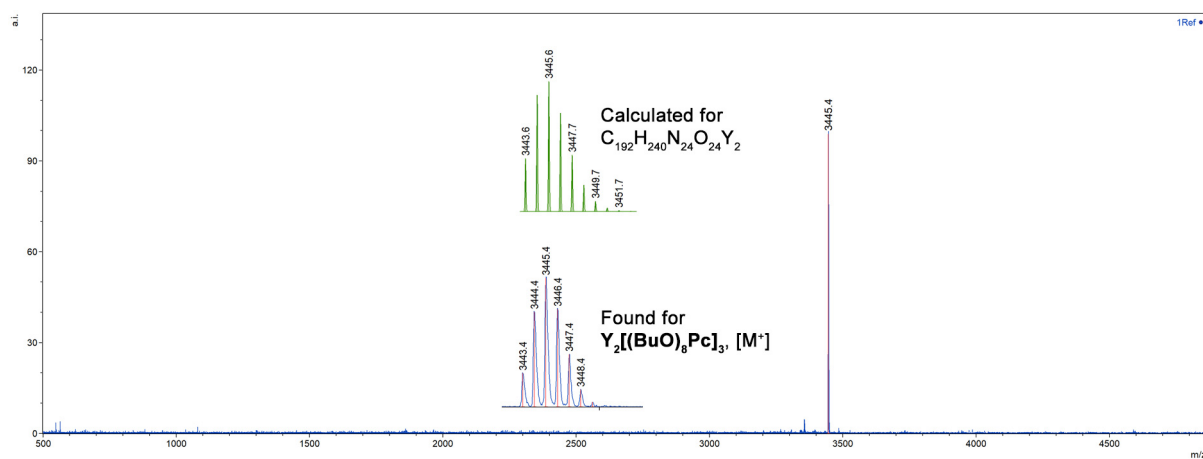

Figure S5. MALDI TOF mass-spectrum of  $Y_2[(BuO)_8Pc]_3$ .

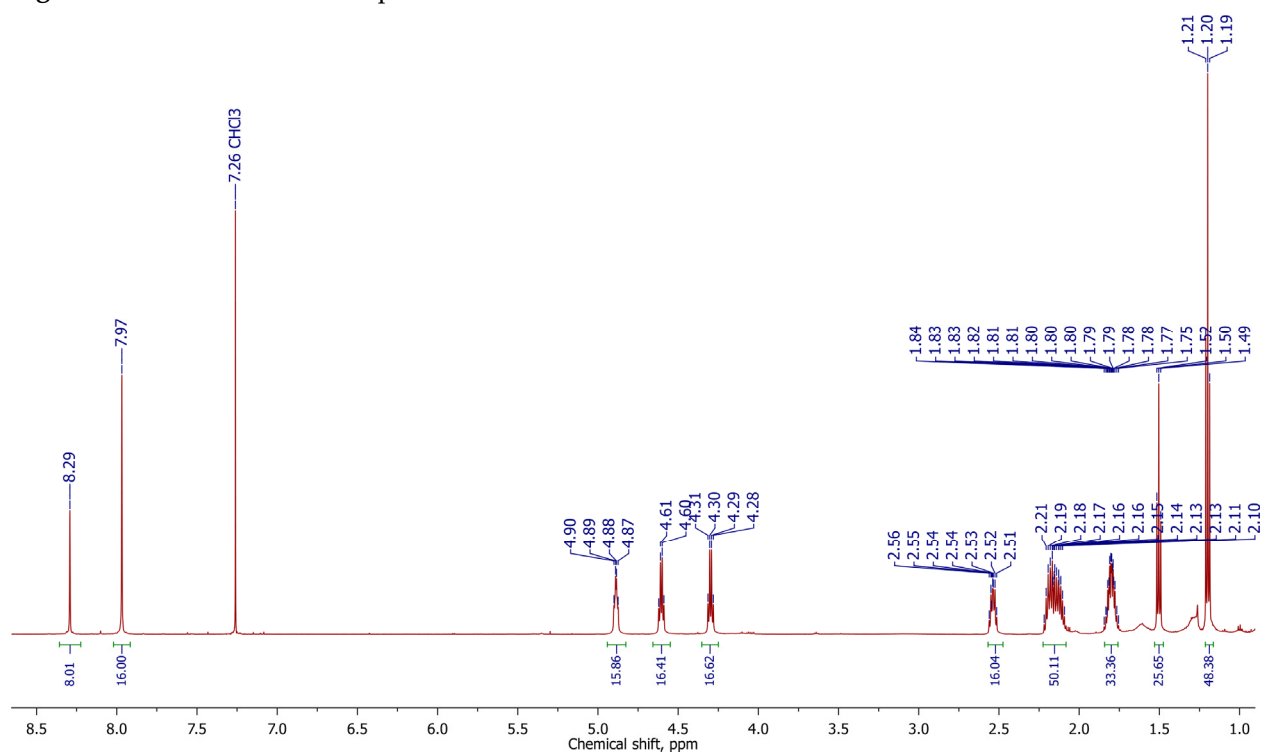

Figure S6.  $^1H$ -NMR spectrum of  $Y_2[(BuO)_8Pc]_3$  in  $CDCl_3$ .

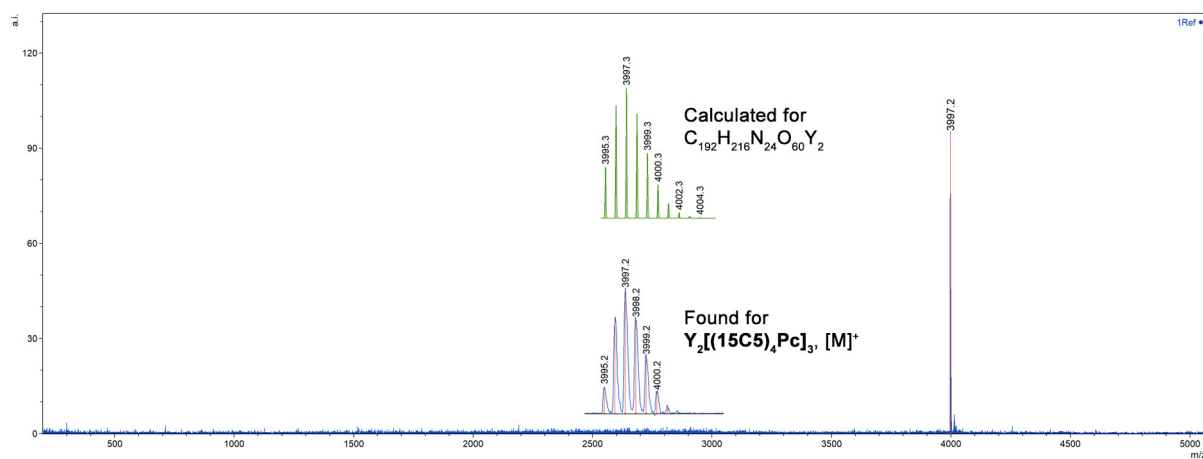

Figure S7. MALDI TOF mass-spectrum of  $Y_2[(15C5)_4Pc]_3$ .

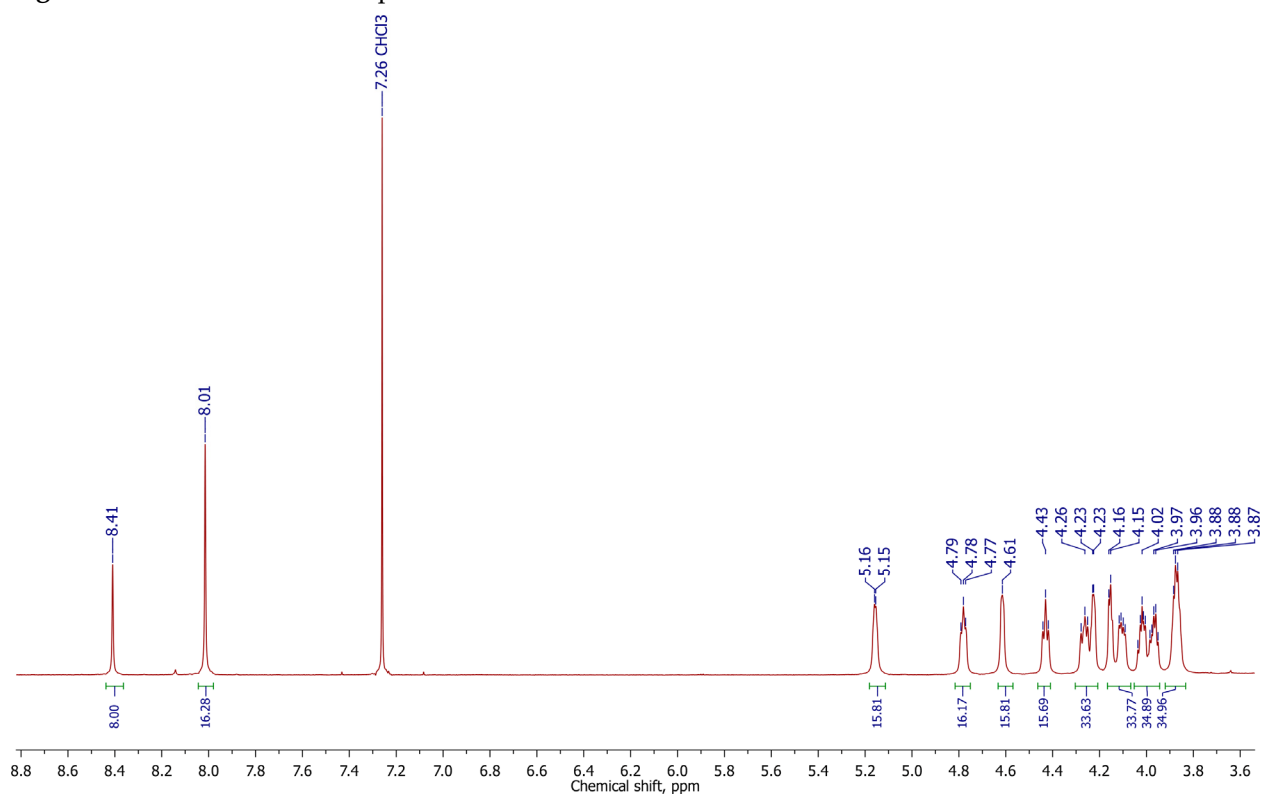

Figure S8.  $^1H$ -NMR spectrum of  $Y_2[(15C5)_4Pc]_3$  in  $CDCl_3$ .

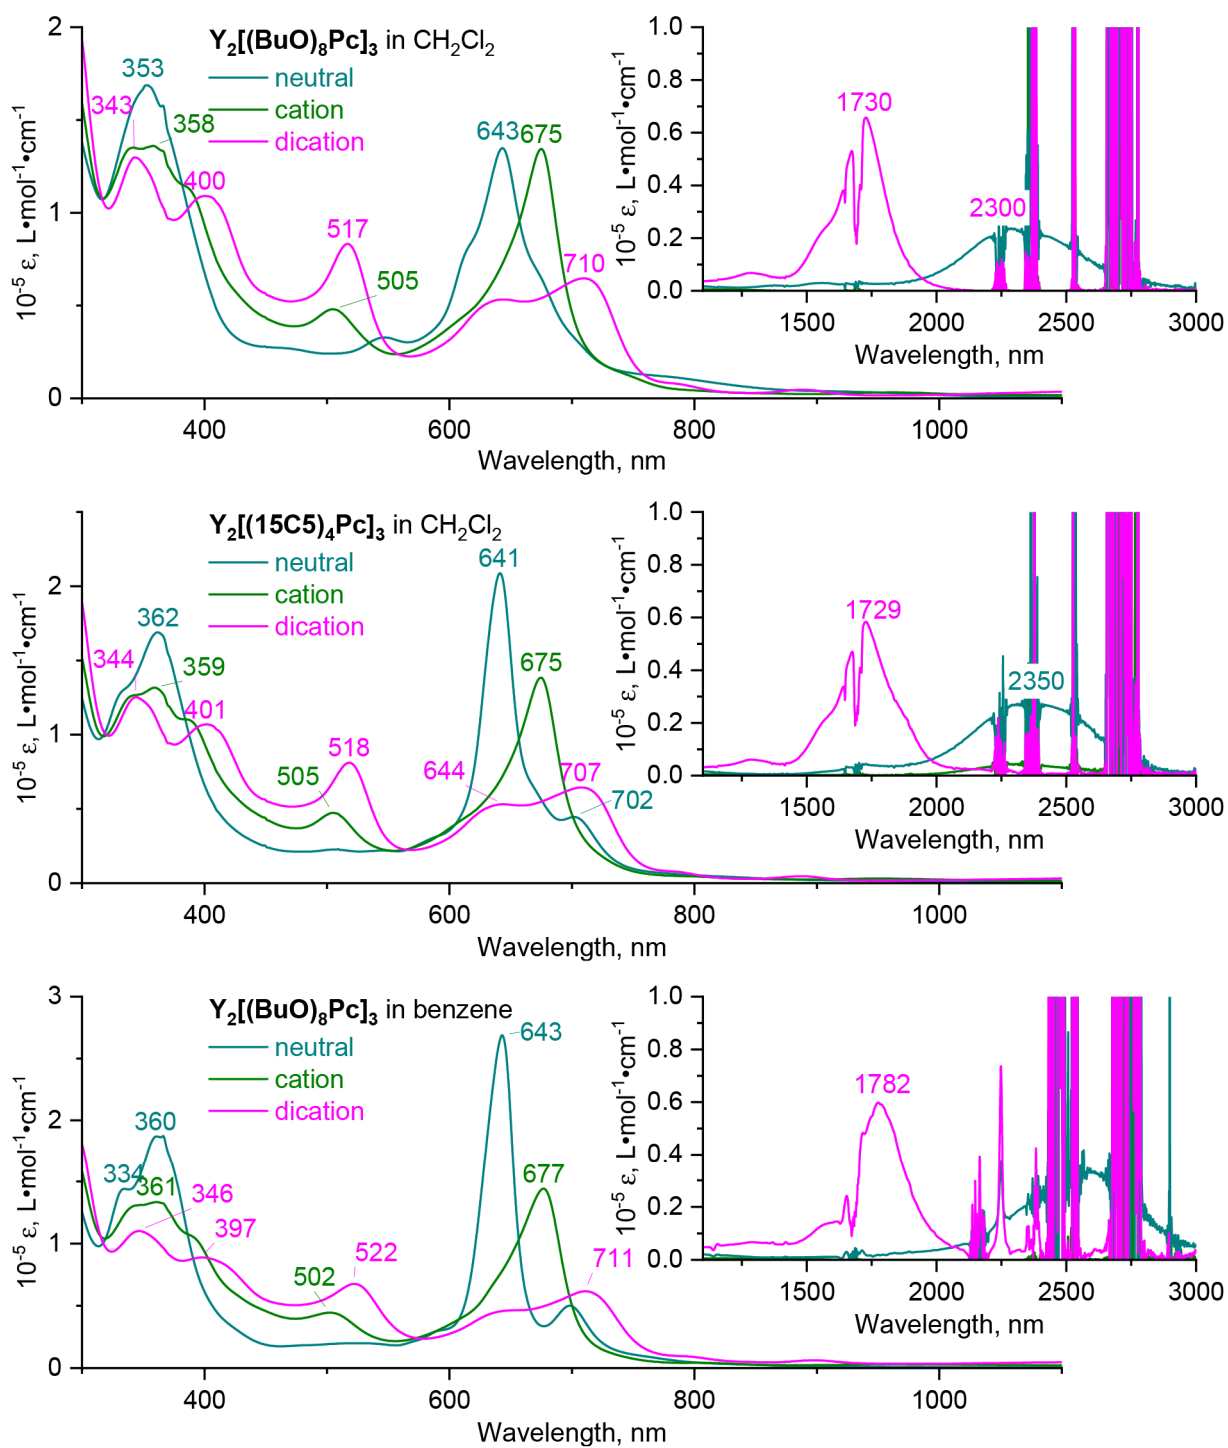

**Figure S9.** UV-vis-NIR spectra of neutral forms of  $\text{Y}_2[(\text{BuO})_8\text{Pc}]_3$  and  $\text{Y}_2[(15\text{C}5)_4\text{Pc}]_3$  and their mono- and dicationic forms, obtained by 1e- and 2e-oxidation with  $\text{OxSbCl}_6$ .

**Table S1.** The calculated UV-vis-NIR absorption spectrum of **s-Y<sub>2</sub>[(MeO)<sub>8</sub>Pc]<sub>3</sub>** for the BP86/def2-SVP geometry calculated by the sTDA method at the CAM-B3LYP/6-31G(d) level of theory.

| Wavelength, nm | Energy, eV | F <sub>osc.</sub> <sup>(1)</sup> | Wavefunction <sup>(2,3)</sup>                    |
|----------------|------------|----------------------------------|--------------------------------------------------|
| 932.4          | 1.33       | 0.06                             | -0.83 H→L+5; 0.36 H-2→L; 0.32 H-2→L+1; ...       |
| 932.4          | 1.33       | 0.06                             | 0.83 H→L+4; -0.36 H-2→L+1; 0.32 H-2→L; ...       |
| 654.0          | 1.90       | 0.01                             | -0.67 H-1→L+2; -0.43 H-1→L+3; 0.4 H-2→L; ...     |
| 654.0          | 1.90       | 0.01                             | -0.67 H-1→L+3; 0.43 H-1→L+2; -0.4 H-2→L+1; ...   |
| 579.5          | 2.14       | 1.35                             | 0.49 H-2→L+1; -0.39 H-1→L+3; -0.37 H-1→L+2; ...  |
| 579.5          | 2.14       | 1.35                             | 0.49 H-2→L; 0.39 H-1→L+2; -0.37 H-1→L+3; ...     |
| 527.0          | 2.35       | 0.12                             | 0.9 H-3→L; 0.25 H-7→L; -0.21 H-17→L; ...         |
| 526.9          | 2.35       | 0.12                             | 0.9 H-3→L+1; 0.25 H-7→L+1; -0.21 H-17→L+1; ...   |
| 473.3          | 2.62       | 0.03                             | -0.77 H-8→L; -0.4 H-7→L; -0.35 H-8→L+1; ...      |
| 473.3          | 2.62       | 0.03                             | -0.77 H-8→L+1; 0.4 H-7→L+1; 0.35 H-8→L; ...      |
| 457.3          | 2.71       | 0.01                             | 0.55 H-11→L+1; 0.55 H-10→L; 0.42 H-10→L+1; ...   |
| 447.9          | 2.77       | 0.06                             | 0.93 H-12→L; 0.26 H-7→L; -0.17 H-7→L+1; ...      |
| 447.9          | 2.77       | 0.06                             | 0.93 H-12→L+1; -0.26 H-7→L+1; -0.17 H-7→L; ...   |
| 427.3          | 2.90       | 0.01                             | -0.96 H-2→L+5; -0.12 H-3→L+1; 0.08 H-27→L+1; ... |
| 427.3          | 2.90       | 0.01                             | 0.96 H-2→L+4; -0.12 H-3→L; 0.08 H-27→L; ...      |

<sup>(1)</sup> Excitations with oscillator strength, F<sub>osc.</sub> above 0.01 are shown.

<sup>(2)</sup> Only contributions of greater than 10% are consistently included.

<sup>(3)</sup> H stands for HOMO, L stands for LUMO



**Table S2.** The calculated UV-vis-NIR absorption spectrum of  $s\text{-Y}_2[(\text{MeO})_8\text{Pc}]_3^+$  for the BP86/def2-SVP geometry calculated by the sTDA method at the CAM-B3LYP/6-31G(d) level of theory.

| Wavelength, nm | Energy, eV | $F_{\text{osc.}}^{(1)}$ | Wavefunction <sup>(2)</sup>                              |
|----------------|------------|-------------------------|----------------------------------------------------------|
| 2491.8         | 0.50       | 0.22                    | -1 bH→bL; -0.02 aH-17→bL+6; -0.02 aH-18→bL+5; ...        |
| 842.5          | 1.47       | 0.03                    | -0.65 bH-2→bL; 0.52 bH-1→bL+1; 0.48 bH→bL+5; ...         |
| 842.5          | 1.47       | 0.03                    | 0.65 bH-2→bL+1; -0.52 bH-1→bL+2; -0.48 bH→bL+4; ...      |
| 795.2          | 1.56       | 0.03                    | -0.49 bH-1→bL+1; 0.49 bH→bL+3; 0.48 bH→bL+4; ...         |
| 795.2          | 1.56       | 0.03                    | 0.49 bH-1→bL+2; 0.49 bH→bL+4; -0.48 bH→bL+3; ...         |
| 662.7          | 1.87       | 0.01                    | -0.59 bH-1→bL+2; 0.48 bH-2→bL+1; 0.39 bH-3→bL; ...       |
| 662.7          | 1.87       | 0.01                    | 0.59 bH-1→bL+3; -0.48 bH-2→bL; 0.39 bH-3→bL+1; ...       |
| 623.9          | 1.99       | 0.66                    | -0.48 bH-1→bL+3; -0.36 aH-12→bL; -0.35 bH-2→bL; ...      |
| 623.9          | 1.99       | 0.66                    | -0.48 bH-1→bL+2; 0.36 aH-13→bL; -0.35 bH-2→bL+1; ...     |
| 596.0          | 2.08       | 0.10                    | 0.85 bH-5→bL; 0.19 bH-3→bL; 0.17 bH-3→bL+1; ...          |
| 596.0          | 2.08       | 0.10                    | -0.85 bH-4→bL; -0.19 bH-3→bL+1; 0.17 bH-3→bL; ...        |
| 564.7          | 2.20       | 0.03                    | 0.65 aH-9→bL; 0.48 bH-3→bL; -0.26 aH-8→bL+1; ...         |
| 564.7          | 2.20       | 0.03                    | 0.65 aH-9→bL+1; 0.48 bH-3→bL+1; -0.26 aH-8→bL; ...       |
| 543.3          | 2.28       | 0.21                    | -0.57 bH-2→bL+1; 0.44 aH-9→bL; 0.33 aH-11→bL+1; ...      |
| 543.3          | 2.28       | 0.21                    | 0.57 bH-2→bL+2; -0.44 aH-9→bL+1; -0.33 aH-11→bL+2; ...   |
| 535.5          | 2.32       | 0.01                    | 0.53 aH-11→bL; -0.52 aH-10→bL+1; -0.43 aH-11→bL+1; ...   |
| 526.4          | 2.36       | 0.15                    | -0.46 bH-2→bL+2; -0.44 aH-12→bL; -0.36 aH-13→bL; ...     |
| 526.4          | 2.36       | 0.15                    | -0.46 bH-2→bL+1; -0.44 aH-13→bL; 0.36 aH-12→bL; ...      |
| 515.1          | 2.41       | 0.01                    | 0.41 bH-7→bL+1; -0.41 aH-11→bL+2; 0.34 aH-14→bL+1; ...   |
| 515.1          | 2.41       | 0.01                    | 0.41 aH-11→bL+1; -0.41 bH-7→bL+2; 0.34 aH-14→bL; ...     |
| 508.4          | 2.44       | 0.03                    | 0.52 aH-14→bL+1; 0.43 aH-14→bL; -0.42 bH-7→bL+1; ...     |
| 508.4          | 2.44       | 0.03                    | 0.52 aH-14→bL; -0.43 aH-14→bL+1; 0.42 bH-7→bL+2; ...     |
| 503.1          | 2.46       | 0.02                    | -0.47 aH-11→bL+1; -0.45 bH-7→bL+2; -0.38 aH-11→bL+2; ... |
| 503.1          | 2.47       | 0.02                    | 0.47 aH-11→bL+2; 0.45 bH-7→bL+1; -0.38 aH-11→bL+1; ...   |
| 491.7          | 2.52       | 0.01                    | -0.51 aH-10→bL+1; 0.51 aH-9→bL+2; 0.44 aH-10→bL+2; ...   |
| 461.2          | 2.69       | 0.09                    | -0.9 aH-14→bL+1; 0.3 aH-14→bL; -0.19 aH-13→bL; ...       |
| 461.2          | 2.69       | 0.09                    | 0.9 aH-14→bL+2; -0.3 aH-14→bL+1; -0.19 aH-12→bL; ...     |
| 427.7          | 2.90       | 0.01                    | 0.51 aH-16→bL; 0.49 aH-19→bL+1; -0.28 aH-22→bL+2; ...    |
| 427.7          | 2.90       | 0.01                    | -0.51 aH-15→bL; 0.49 aH-19→bL; -0.28 aH-22→bL+1; ...     |
| 422.6          | 2.93       | 0.02                    | -0.55 bH-4→bL+2; -0.31 bH-4→bL+3; 0.3 aH-8→bL+4; ...     |
| 422.6          | 2.93       | 0.02                    | 0.55 bH-4→bL+3; -0.31 bH-4→bL+2; -0.3 aH-8→bL+5; ...     |
| 417.2          | 2.97       | 0.26                    | 0.57 aH-16→bL; -0.5 aH-19→bL+1; 0.34 aH-15→bL; ...       |
| 417.2          | 2.97       | 0.26                    | -0.57 aH-15→bL; -0.5 aH-19→bL; 0.34 aH-16→bL; ...        |
| 409.2          | 3.03       | 0.04                    | -0.58 bH-2→bL+4; -0.52 bH-1→bL+5; 0.28 bH-3→bL+5; ...    |

|       |      |      |                                                        |
|-------|------|------|--------------------------------------------------------|
| 409.2 | 3.03 | 0.04 | 0.58 bH-2→bL+5; 0.52 bH-1→bL+6; 0.28 bH-3→bL+4; ...    |
| 402.4 | 3.08 | 0.13 | -0.33 bH-4→bL+3; -0.33 bH-7→bL+3; -0.32 bH-3→bL+5; ... |
| 402.4 | 3.08 | 0.13 | 0.33 bH-4→bL+2; -0.32 bH-7→bL+2; -0.32 bH-3→bL+4; ...  |
| 401.2 | 3.09 | 0.01 | -0.52 bH-5→bL+2; -0.52 bH-6→bL+3; -0.24 bH-5→bL+3; ... |

---

<sup>(1)</sup> Excitations with oscillator strength,  $F_{\text{osc}}$ , above 0.01 are shown.

<sup>(2)</sup> H stands for HOMO, L stands for LUMO

**Table S3.** The calculated UV-vis-NIR absorption spectrum of **s-Y<sub>2</sub>[(MeO)<sub>8</sub>Pc]<sub>3</sub><sup>2+</sup>** for the BP86/def2-SVP geometry calculated by the sTDA method at the CAM-B3LYP/6-31G(d) level of theory.

| Wavelength, nm | Energy, eV | F <sub>osc.</sub> <sup>(1)</sup> | Wavefunction <sup>(2)</sup>                   |
|----------------|------------|----------------------------------|-----------------------------------------------|
| 1616.0         | 0.77       | 0.74                             | -0.99 H→L; 0.03 H-8→L+2; -0.03 H-9→L+1        |
| 748.1          | 1.66       | 0.01                             | -0.56 H-1→L+1; -0.52 H→L+3; -0.48 H→L+4       |
| 748.1          | 1.66       | 0.01                             | -0.56 H-1→L+2; -0.52 H→L+4; 0.48 H→L+3        |
| 701.8          | 1.77       | 0.42                             | 0.58 H→L+4; -0.57 H-1→L+2; -0.33 H-12→L       |
| 701.8          | 1.77       | 0.42                             | 0.58 H→L+3; -0.57 H-1→L+1; -0.33 H-11→L       |
| 691.4          | 1.79       | 0.01                             | -0.94 H-6→L; 0.17 H-12→L; -0.11 H→L+3         |
| 603.9          | 2.05       | 0.03                             | -0.87 H-2→L+1; 0.37 H-10→L+1; 0.2 H-1→L+2     |
| 603.9          | 2.05       | 0.03                             | 0.87 H-2→L+2; -0.37 H-10→L+2; 0.2 H-1→L+1     |
| 579.7          | 2.14       | 0.02                             | -0.67 H-7→L+1; -0.38 H-11→L; -0.37 H-10→L+1   |
| 579.7          | 2.14       | 0.02                             | -0.67 H-7→L+2; 0.38 H-12→L; 0.37 H-10→L+2     |
| 570.2          | 2.17       | 0.42                             | -0.49 H-10→L+2; -0.47 H-10→L+1; -0.33 H-7→L+2 |
| 570.2          | 2.17       | 0.42                             | -0.49 H-10→L+1; 0.47 H-10→L+2; 0.33 H-7→L+1   |
| 568.3          | 2.18       | 0.21                             | -0.64 H-11→L; 0.53 H-7→L+1; 0.25 H-10→L+2     |
| 568.3          | 2.18       | 0.21                             | 0.64 H-12→L; 0.53 H-7→L+2; 0.25 H-10→L+1      |
| 558.5          | 2.22       | 0.02                             | -0.58 H-9→L+1; 0.58 H-8→L+2; 0.39 H-9→L+2     |
| 501.5          | 2.47       | 0.10                             | 0.95 H-13→L+2; -0.15 H-11→L; -0.13 H-13→L+1   |
| 501.5          | 2.47       | 0.10                             | 0.95 H-13→L+1; -0.15 H-12→L; 0.13 H-13→L+2    |
| 445.5          | 2.78       | 0.45                             | 0.8 H-15→L; -0.47 H-14→L; 0.12 H-21→L+2       |
| 445.5          | 2.78       | 0.45                             | -0.8 H-14→L; -0.47 H-15→L; -0.12 H-21→L+1     |
| 404.8          | 3.06       | 0.01                             | 0.76 H-4→L+3; 0.29 H-3→L+4; -0.27 H-7→L+6     |
| 404.8          | 3.06       | 0.01                             | -0.76 H-4→L+4; -0.29 H-3→L+3; 0.27 H-7→L+5    |

<sup>(1)</sup> Excitations with oscillator strength, F<sub>osc.</sub> above 0.01 are shown.

<sup>(2)</sup> H stands for HOMO, L stands for LUMO

**Table S4.** The calculated UV-vis-NIR absorption spectrum of **g-Y<sub>2</sub>[(MeO)<sub>8</sub>Pc]<sub>3</sub>** for the BP86/def2-SVP geometry calculated by the sTDA method at the CAM-B3LYP/6-31G(d) level of theory.

| Wavelength, nm | Energy, eV | F <sub>osc.</sub> <sup>(1)</sup> | Wavefunction <sup>(2)</sup>                   |
|----------------|------------|----------------------------------|-----------------------------------------------|
| 1613.3         | 0.77       | 0.02                             | -0.97 H→L; -0.18 H→L+5; 0.06 H→L+4            |
| 1613.2         | 0.77       | 0.02                             | -0.97 H→L+1; -0.18 H→L+4; -0.06 H→L+5         |
| 1052.5         | 1.18       | 0.03                             | 0.87 H-2→L; -0.37 H-1→L; 0.15 H-1→L+5         |
| 1052.5         | 1.18       | 0.03                             | 0.87 H-2→L+1; -0.37 H-1→L+1; 0.15 H-1→L+4     |
| 807.6          | 1.54       | 0.01                             | 0.66 H-2→L+3; -0.63 H-1→L+3; 0.29 H→L+2       |
| 807.6          | 1.54       | 0.01                             | -0.66 H-2→L+2; 0.63 H-1→L+2; 0.29 H→L+3       |
| 709.2          | 1.75       | 0.03                             | -0.66 H→L+2; -0.61 H→L+3; -0.22 H-1→L+3       |
| 709.2          | 1.75       | 0.03                             | -0.66 H→L+3; 0.61 H→L+2; 0.22 H-1→L+2         |
| 686.8          | 1.81       | 0.10                             | -0.53 H→L+5; 0.49 H-2→L+4; -0.46 H-1→L+4      |
| 686.8          | 1.81       | 0.10                             | 0.53 H→L+4; 0.49 H-2→L+5; -0.46 H-1→L+5       |
| 577.5          | 2.15       | 0.24                             | 0.74 H-1→L+5; -0.3 H-1→L+4; 0.27 H-2→L+5      |
| 577.5          | 2.15       | 0.24                             | -0.74 H-1→L+4; -0.3 H-1→L+5; -0.27 H-2→L+4    |
| 550.4          | 2.25       | 0.82                             | 0.67 H-2→L+4; 0.3 H→L+5; 0.28 H-2→L+5         |
| 550.4          | 2.25       | 0.82                             | -0.67 H-2→L+5; 0.3 H→L+4; 0.28 H-2→L+4        |
| 526.2          | 2.36       | 0.01                             | -0.92 H-3→L+1; 0.21 H-6→L+1; -0.19 H-3→L      |
| 526.2          | 2.36       | 0.01                             | 0.92 H-3→L; 0.21 H-6→L; -0.19 H-3→L+1         |
| 496.3          | 2.50       | 0.05                             | 0.81 H-6→L+1; -0.33 H-6→L; 0.22 H-3→L         |
| 496.2          | 2.50       | 0.05                             | -0.81 H-6→L; -0.33 H-6→L+1; -0.22 H-3→L+1     |
| 474.8          | 2.61       | 0.02                             | -0.88 H-7→L+1; -0.32 H-7→L; -0.2 H-3→L+3      |
| 474.8          | 2.61       | 0.02                             | 0.88 H-7→L; -0.32 H-7→L+1; -0.2 H-3→L+2       |
| 440.7          | 2.81       | 0.02                             | -0.56 H-11→L; 0.55 H-15→L; -0.3 H-10→L+1      |
| 440.7          | 2.81       | 0.02                             | -0.56 H-11→L+1; 0.55 H-15→L+1; 0.3 H-10→L     |
| 436.3          | 2.84       | 0.09                             | -0.81 H-10→L; -0.45 H-11→L+1; -0.17 H-6→L+2   |
| 436.3          | 2.84       | 0.09                             | 0.81 H-10→L+1; -0.45 H-11→L; -0.17 H-6→L+3    |
| 413.9          | 3.00       | 0.02                             | -0.78 H-12→L+1; -0.29 H-11→L+1; -0.23 H-7→L+3 |
| 413.9          | 3.00       | 0.02                             | 0.78 H-12→L; -0.29 H-11→L; -0.23 H-7→L+2      |
| 407.1          | 3.05       | 0.01                             | -0.64 H-13→L+1; -0.64 H-14→L; -0.21 H-13→L    |

<sup>(1)</sup> Excitations with oscillator strength, F<sub>osc.</sub> above 0.01 are shown.

<sup>(2)</sup> H stands for HOMO, L stands for LUMO

**Table S5.** The calculated UV-vis-NIR absorption spectrum of  $g\text{-Y}_2[(\text{MeO})_8\text{Pc}]_3^+$  for the BP86/def2-SVP geometry calculated by the sTDA method at the CAM-B3LYP/6-31G(d) level of theory.

| Wavelength, nm | Energy, eV | $F_{\text{osc.}}^{(1)}$ | Wavefunction <sup>(2)</sup>                      |
|----------------|------------|-------------------------|--------------------------------------------------|
| 1160.6         | 1.07       | 0.01                    | -0.69 bH-1→bL+1; 0.52 bH-1→bL; 0.42 bH-1→bL+2    |
| 1093.9         | 1.13       | 0.01                    | 0.8 bH-1→bL+2; 0.43 bH-1→bL+3; -0.36 bH-1→bL+1   |
| 896.6          | 1.38       | 0.02                    | 0.68 bH-2→bL; -0.29 bH→bL+2; 0.29 bH-2→bL        |
| 889.5          | 1.39       | 0.01                    | -0.61 bH-2→bL+1; -0.39 bH-1→bL+2; 0.35 bH-4→bL   |
| 875.4          | 1.42       | 0.01                    | 0.59 bH-4→bL; 0.53 bH-2→bL+1; -0.42 aH-9→bL      |
| 828.7          | 1.50       | 0.05                    | -0.66 bH-1→bL+2; -0.36 bH-1→bL+1; -0.34 bH-4→bL  |
| 827.6          | 1.50       | 0.01                    | 0.76 bH-5→bL; -0.42 aH-10→bL; 0.24 bH-7→bL       |
| 815.2          | 1.52       | 0.04                    | -0.76 bH-1→bL+3; 0.38 bH-1→bL+2; 0.28 bH-3→bL    |
| 739.4          | 1.68       | 0.06                    | 0.63 bH→bL+4; -0.31 bH→bL+3; 0.28 bH→bL+6        |
| 738.4          | 1.68       | 0.06                    | 0.61 bH→bL+3; 0.33 bH→bL+4; -0.28 bH→bL+5        |
| 718.4          | 1.73       | 0.04                    | 0.46 bH-7→bL; -0.43 bH-3→bL; 0.33 bH→bL+3        |
| 717.9          | 1.73       | 0.04                    | 0.47 aH-9→bL; 0.44 bH-4→bL; -0.29 bH→bL+4        |
| 680.7          | 1.82       | 0.02                    | -0.87 bH-1→bL+3; 0.19 bH-1→bL+4; -0.16 bH-2→bL+2 |
| 673.0          | 1.84       | 0.01                    | -0.74 bH-1→bL+4; -0.3 bH-5→bL; -0.28 aH-11→bL    |
| 638.8          | 1.94       | 0.18                    | -0.55 bH→bL+5; 0.47 bH→bL+4; -0.35 bH→bL+6       |
| 637.6          | 1.95       | 0.17                    | 0.54 bH→bL+6; 0.47 bH→bL+5; -0.36 bH→bL+5        |
| 630.2          | 1.97       | 0.02                    | -0.73 aH-11→bL; 0.49 aH-10→bL; -0.21 bH-7→bL     |
| 620.6          | 2.00       | 0.02                    | 0.49 bH-3→bL+1; -0.34 bH-5→bL+1; -0.32 bH-2→bL+2 |
| 618.5          | 2.01       | 0.03                    | -0.65 bH-3→bL; -0.28 bH-2→bL+3; 0.27 bH-4→bL+1   |
| 613.2          | 2.02       | 0.03                    | 0.75 bH-2→bL+2; 0.21 aH-13→bL; 0.18 bH-5→bL      |
| 609.3          | 2.04       | 0.02                    | 0.45 aH-12→bL; -0.44 bH-2→bL+3; 0.33 bH-5→bL     |
| 606.7          | 2.04       | 0.01                    | 0.5 aH-12→bL; -0.48 aH-14→bL; -0.38 bH-3→bL      |
| 593.3          | 2.09       | 0.01                    | 0.5 aH-13→bL; 0.3 bH-4→bL; 0.27 bH-2→bL+2        |
| 592.2          | 2.09       | 0.02                    | 0.51 aH-14→bL; 0.39 bH-1→bL+5; 0.31 aH-12→bL     |
| 585.5          | 2.12       | 0.03                    | 0.51 bH-1→bL+5; 0.46 bH-1→bL+4; 0.38 aH-13→bL    |
| 582.6          | 2.13       | 0.01                    | 0.5 bH-2→bL+1; -0.33 bH-3→bL+2; -0.31 bH-1→bL+5  |
| 579.4          | 2.14       | 0.03                    | 0.51 bH-1→bL+6; -0.47 bH-1→bL+5; -0.36 bH-2→bL+1 |
| 571.5          | 2.17       | 0.02                    | 0.64 aH-15→bL; -0.34 bH-3→bL+1; -0.21 bH-6→bL    |
| 569.3          | 2.18       | 0.02                    | 0.51 bH-3→bL+1; 0.46 aH-15→bL; 0.28 bH-5→bL+1    |
| 549.1          | 2.26       | 0.01                    | -0.46 bH-4→bL+1; 0.4 bH-6→bL+1; 0.38 bH-3→bL+1   |
| 531.3          | 2.33       | 0.04                    | 0.47 bH-7→bL; 0.37 bH-2→bL+2; -0.27 bH-1→bL+5    |
| 530.6          | 2.34       | 0.14                    | -0.49 bH-7→bL; 0.41 bH-1→bL+6; 0.29 bH-1→bL+5    |
| 529.8          | 2.34       | 0.16                    | 0.39 bH-1→bL+5; -0.32 bH-1→bL+4; 0.29 bH-1→bL+6  |
| 528.4          | 2.35       | 0.02                    | 0.42 bH-7→bL+1; -0.37 bH-4→bL+2; -0.35 aH-8→bL   |

|       |      |      |                                                    |
|-------|------|------|----------------------------------------------------|
| 524.7 | 2.36 | 0.09 | 0.36 bH-7→bL; -0.31 bH-3→bL+2; -0.28 bH-2→bL+2     |
| 520.2 | 2.38 | 0.11 | 0.4 bH-5→bL+1; 0.4 aH-9→bL+1; -0.34 aH-8→bL        |
| 519.0 | 2.39 | 0.02 | 0.41 bH-4→bL+2; -0.4 aH-8→bL; -0.38 bH-5→bL+1      |
| 507.7 | 2.44 | 0.03 | -0.47 aH-8→bL+1; -0.42 aH-9→bL; -0.31 aH-8→bL      |
| 504.7 | 2.46 | 0.02 | -0.4 aH-10→bL; -0.39 aH-9→bL+1; 0.32 aH-8→bL+1     |
| 502.9 | 2.47 | 0.01 | -0.62 bH-5→bL+2; 0.37 bH-3→bL+2; 0.24 aH-15→bL     |
| 501.4 | 2.47 | 0.02 | 0.4 aH-20→bL; -0.39 aH-15→bL; -0.39 bH-5→bL+2      |
| 498.4 | 2.49 | 0.02 | -0.51 aH-10→bL; 0.35 aH-9→bL+1; -0.24 bH-6→bL      |
| 484.8 | 2.56 | 0.02 | 0.6 bH-6→bL+2; -0.39 bH-7→bL+1; 0.24 aH-9→bL+2     |
| 480.9 | 2.58 | 0.01 | 0.5 bH-6→bL+1; -0.35 bH-7→bL+2; -0.32 aH-10→bL+1   |
| 479.2 | 2.59 | 0.02 | -0.52 aH-11→bL; -0.31 aH-22→bL; 0.28 aH-20→bL      |
| 477.4 | 2.60 | 0.06 | -0.41 aH-19→bL; 0.36 aH-11→bL+1; -0.31 aH-17→bL    |
| 471.5 | 2.63 | 0.01 | 0.61 aH-9→bL+1; -0.36 bH-6→bL+1; 0.22 aH-16→bL     |
| 468.8 | 2.65 | 0.03 | 0.4 bH-3→bL+2; -0.29 aH-16→bL; -0.27 aH-11→bL      |
| 468.0 | 2.65 | 0.01 | 0.34 bH-3→bL+2; 0.28 aH-12→bL+1; -0.27 bH-4→bL+2   |
| 467.3 | 2.65 | 0.01 | 0.49 bH-3→bL+3; -0.32 aH-17→bL; 0.29 aH-21→bL      |
| 465.3 | 2.66 | 0.12 | 0.39 aH-10→bL+1; 0.28 aH-16→bL; 0.27 bH-3→bL+2     |
| 464.4 | 2.67 | 0.01 | -0.45 bH-3→bL+3; 0.31 aH-10→bL+1; -0.24 aH-11→bL+1 |
| 463.2 | 2.68 | 0.01 | 0.36 aH-17→bL; -0.3 bH-3→bL+2; 0.29 aH-10→bL+1     |
| 461.3 | 2.69 | 0.02 | -0.48 aH-18→bL; 0.32 aH-27→bL; -0.28 aH-23→bL      |
| 461.2 | 2.69 | 0.02 | 0.33 aH-18→bL; -0.28 aH-27→bL; -0.27 aH-16→bL      |
| 460.0 | 2.70 | 0.02 | -0.34 bH-4→bL+3; -0.3 aH-12→bL; -0.26 bH-4→bL+2    |
| 459.2 | 2.70 | 0.06 | 0.39 bH-5→bL+2; 0.26 aH-16→bL; 0.26 aH-18→bL       |
| 458.6 | 2.70 | 0.06 | 0.31 aH-15→bL; -0.28 aH-26→bL; -0.28 aH-16→bL      |
| 456.4 | 2.72 | 0.07 | -0.25 bH-7→bL+2; -0.25 aH-9→bL+1; 0.24 aH-12→bL    |
| 454.8 | 2.73 | 0.01 | 0.48 bH-4→bL+3; -0.36 bH-5→bL+2; -0.29 bH-4→bL+2   |
| 454.4 | 2.73 | 0.05 | 0.36 bH-6→bL+1; 0.31 aH-9→bL+1; 0.3 bH-7→bL+1      |
| 451.2 | 2.75 | 0.05 | 0.31 aH-12→bL+1; 0.3 bH-4→bL+2; -0.26 bH-5→bL+2    |
| 450.6 | 2.75 | 0.01 | -0.41 bH→bL+7; -0.26 aH-10→bL+2; -0.24 bH→bL+8     |
| 448.5 | 2.76 | 0.09 | -0.29 aH-15→bL+1; -0.28 aH-11→bL; -0.25 bH→bL+6    |
| 447.5 | 2.77 | 0.04 | 0.35 aH-13→bL; 0.27 aH-15→bL+2; -0.26 aH-15→bL     |
| 446.3 | 2.78 | 0.01 | 0.34 aH-13→bL; 0.27 aH-10→bL+2; -0.26 aH-15→bL+2   |
| 443.6 | 2.80 | 0.02 | 0.34 aH-10→bL+2; -0.34 aH-9→bL+2; -0.25 aH-15→bL+1 |
| 442.7 | 2.80 | 0.01 | -0.47 aH-9→bL+2; -0.35 bH→bL+6; -0.26 aH-14→bL     |
| 442.3 | 2.80 | 0.01 | 0.41 bH-6→bL+2; 0.32 bH-6→bL+3; -0.28 aH-13→bL     |
| 437.3 | 2.84 | 0.02 | 0.39 aH-21→bL; 0.38 aH-26→bL; 0.32 aH-17→bL        |
| 437.2 | 2.84 | 0.01 | -0.42 bH→bL+6; -0.3 bH→bL+7; 0.26 aH-14→bL         |

|       |      |      |                                                    |
|-------|------|------|----------------------------------------------------|
| 436.8 | 2.84 | 0.03 | 0.48 aH-25→bL; 0.25 aH-16→bL; 0.25 bH-6→bL+3       |
| 434.8 | 2.85 | 0.02 | 0.34 aH-14→bL+1; 0.29 aH-14→bL; -0.23 aH-18→bL     |
| 428.0 | 2.90 | 0.04 | 0.3 aH-15→bL+1; 0.24 aH-11→bL+1; 0.21 aH-15→bL     |
| 420.2 | 2.95 | 0.01 | 0.35 bH-2→bL+3; 0.32 bH-2→bL+5; 0.28 bH-3→bL+4     |
| 417.9 | 2.97 | 0.01 | 0.32 bH-4→bL+5; 0.27 bH-4→bL+3; 0.27 aH-9→bL+2     |
| 412.3 | 3.01 | 0.05 | -0.5 aH-11→bL+1; 0.22 aH-19→bL; 0.21 bH-1→bL+6     |
| 411.1 | 3.02 | 0.01 | -0.43 aH-11→bL+2; -0.24 bH-7→bL+2; 0.23 aH-19→bL+1 |
| 410.5 | 3.02 | 0.02 | -0.45 aH-12→bL+1; 0.36 bH-7→bL+2; -0.33 bH-2→bL+4  |
| 408.4 | 3.04 | 0.03 | 0.33 bH-1→bL+6; -0.3 aH-12→bL+2; -0.23 aH-9→bL+3   |
| 407.6 | 3.04 | 0.02 | -0.43 bH-7→bL+3; -0.29 bH-2→bL+3; -0.21 aH-13→bL+1 |
| 406.3 | 3.05 | 0.09 | 0.27 bH-3→bL+3; -0.25 bH-4→bL+4; 0.25 aH-8→bL+3    |
| 405.4 | 3.06 | 0.01 | -0.31 aH-9→bL+2; -0.28 bH-5→bL+5; -0.26 bH-7→bL+2  |
| 404.3 | 3.07 | 0.04 | 0.27 bH-4→bL+5; 0.26 aH-8→bL+2; -0.26 bH-3→bL+3    |
| 403.8 | 3.07 | 0.05 | -0.36 bH-3→bL+4; 0.32 bH-5→bL+4; -0.25 aH-9→bL+3   |
| 403.4 | 3.07 | 0.14 | -0.43 bH-4→bL+4; 0.38 aH-14→bL+1; -0.24 bH-2→bL+4  |
| 401.6 | 3.09 | 0.07 | -0.55 bH-2→bL+4; 0.25 bH-3→bL+3; -0.23 aH-19→bL+1  |
| 400.9 | 3.09 | 0.03 | 0.35 aH-14→bL+1; -0.29 bH-2→bL+5; 0.27 bH-2→bL+4   |

---

<sup>(1)</sup> Excitations with oscillator strength,  $F_{\text{osc}}$  above 0.01 are shown.

<sup>(2)</sup> H stands for HOMO, L stands for LUMO

**Table S6.** The calculated UV-vis-NIR absorption spectrum of **g-Y<sub>2</sub>[(MeO)<sub>8</sub>Pc]<sub>3</sub><sup>2+</sup>** for the BP86/def2-SVP geometry calculated by the sTDA method at the CAM-B3LYP/6-31G(d) level of theory.

| Wavelength, nm | Energy, eV | F <sub>osc.</sub> <sup>(1)</sup> | Wavefunction <sup>(2)</sup>                  |
|----------------|------------|----------------------------------|----------------------------------------------|
| 3137.3         | 0.40       | 0.51                             | 0.97 H→L; 0.18 H-1→L; 0.04 H-26→L            |
| 1080.2         | 1.15       | 0.01                             | -0.97 H-5→L; -0.09 H-14→L; 0.08 H-4→L+6      |
| 1072.0         | 1.16       | 0.08                             | 0.71 H-1→L+1; 0.58 H-3→L; -0.19 H→L+4        |
| 1071.9         | 1.16       | 0.08                             | -0.71 H-1→L+2; -0.58 H-4→L; -0.19 H→L+3      |
| 911.8          | 1.36       | 0.01                             | -0.93 H-8→L; 0.21 H-7→L; 0.16 H→L+4          |
| 911.8          | 1.36       | 0.01                             | -0.93 H-7→L; -0.21 H-8→L; 0.16 H→L+3         |
| 784.5          | 1.58       | 0.16                             | -0.54 H→L+4; -0.5 H→L+3; 0.42 H-1→L+3        |
| 784.5          | 1.58       | 0.16                             | 0.54 H→L+3; -0.5 H→L+4; 0.42 H-1→L+4         |
| 759.4          | 1.63       | 0.02                             | -0.94 H-10→L; 0.25 H-14→L; -0.1 H-5→L        |
| 750.7          | 1.65       | 0.08                             | 0.77 H-1→L+3; 0.42 H→L+3; -0.27 H-12→L       |
| 750.7          | 1.65       | 0.08                             | 0.77 H-1→L+4; 0.42 H→L+4; 0.27 H-13→L        |
| 696.6          | 1.78       | 0.11                             | 0.88 H-12→L; 0.22 H→L+3; 0.17 H-1→L+5        |
| 696.6          | 1.78       | 0.11                             | -0.88 H-13→L; 0.22 H→L+4; 0.17 H-1→L+6       |
| 631.8          | 1.96       | 0.01                             | -0.92 H→L+6; -0.18 H-1→L+4; -0.15 H→L+1      |
| 631.8          | 1.96       | 0.01                             | -0.92 H→L+5; -0.18 H-1→L+3; 0.15 H→L+2       |
| 595.2          | 2.08       | 0.03                             | 0.83 H-2→L+1; 0.32 H-1→L+6; -0.28 H-5→L+2    |
| 595.2          | 2.08       | 0.03                             | -0.83 H-2→L+2; -0.32 H-1→L+5; 0.28 H-5→L+1   |
| 590.5          | 2.10       | 0.01                             | 0.62 H-4→L+2; 0.61 H-3→L+1; 0.31 H-4→L+1     |
| 586.6          | 2.11       | 0.09                             | -0.75 H-1→L+5; 0.38 H-2→L+2; -0.3 H-15→L     |
| 586.6          | 2.11       | 0.09                             | -0.75 H-1→L+6; 0.38 H-2→L+1; 0.3 H-16→L      |
| 554.4          | 2.24       | 0.03                             | 0.87 H-5→L+1; 0.27 H-2→L+2; 0.2 H-5→L+2      |
| 554.4          | 2.24       | 0.03                             | -0.87 H-5→L+2; -0.27 H-2→L+1; 0.2 H-5→L+1    |
| 525.5          | 2.36       | 0.11                             | -0.61 H-16→L; 0.38 H-6→L+1; -0.31 H-19→L     |
| 525.5          | 2.36       | 0.11                             | 0.61 H-15→L; 0.37 H-6→L+2; 0.31 H-20→L       |
| 518.6          | 2.39       | 0.03                             | -0.83 H-6→L+2; 0.29 H-19→L; 0.21 H-23→L      |
| 518.6          | 2.39       | 0.03                             | 0.83 H-6→L+1; -0.29 H-20→L; 0.21 H-16→L      |
| 508.6          | 2.44       | 0.41                             | -0.54 H-15→L; 0.54 H-20→L; 0.3 H-19→L        |
| 508.6          | 2.44       | 0.41                             | 0.55 H-16→L; -0.54 H-19→L; 0.3 H-20→L        |
| 501.1          | 2.47       | 0.01                             | 0.66 H-8→L+2; 0.66 H-7→L+1; -0.16 H-21→L     |
| 487.3          | 2.54       | 0.01                             | -0.72 H-24→L; -0.44 H-20→L; 0.34 H-23→L      |
| 487.3          | 2.54       | 0.01                             | 0.72 H-23→L; -0.44 H-19→L; 0.34 H-24→L       |
| 478.2          | 2.59       | 0.23                             | 0.78 H-9→L+2; -0.42 H-10→L+1; -0.15 H-9→L+1  |
| 478.2          | 2.59       | 0.23                             | -0.78 H-9→L+1; -0.42 H-10→L+2; -0.15 H-9→L+2 |
| 454.6          | 2.73       | 0.21                             | 0.6 H-10→L+2; 0.5 H-11→L+1; -0.43 H-14→L+2   |



|       |      |      |                                                |
|-------|------|------|------------------------------------------------|
| 454.6 | 2.73 | 0.21 | -0.6 H-10→L+1; -0.5 H-11→L+2; 0.43 H-14→L+1    |
| 444.4 | 2.79 | 0.01 | -0.53 H-12→L+2; -0.53 H-13→L+1; -0.42 H-12→L+1 |
| 440.2 | 2.82 | 0.18 | -0.63 H-11→L+2; -0.44 H-11→L+1; 0.39 H-10→L+2  |
| 440.2 | 2.82 | 0.18 | 0.62 H-11→L+1; -0.44 H-11→L+2; 0.39 H-10→L+1   |
| 432.0 | 2.87 | 0.05 | 0.78 H-2→L+4; 0.34 H-2→L+3; 0.24 H-5→L+4       |
| 432.0 | 2.87 | 0.05 | -0.78 H-2→L+3; 0.34 H-2→L+4; 0.24 H-5→L+3      |
| 430.9 | 2.88 | 0.01 | -0.39 H-13→L+2; 0.39 H-12→L+1; -0.36 H-4→L+3   |
| 430.4 | 2.88 | 0.04 | 0.55 H-4→L+3; -0.5 H-3→L+4; 0.31 H-12→L+1      |
| 412.9 | 3.00 | 0.23 | 0.61 H-5→L+3; 0.39 H-5→L+4; 0.29 H-2→L+6       |
| 412.9 | 3.00 | 0.23 | -0.61 H-5→L+4; 0.39 H-5→L+3; -0.29 H-2→L+5     |
| 407.3 | 3.04 | 0.06 | 0.44 H-14→L+2; -0.36 H-5→L+4; -0.34 H-6→L+3    |
| 407.3 | 3.04 | 0.07 | -0.44 H-14→L+1; 0.36 H-5→L+3; 0.34 H-6→L+4     |

---

<sup>(1)</sup> Excitations with oscillator strength,  $F_{\text{osc}}$ , above 0.01 are shown.

<sup>(2)</sup> H stands for HOMO, L stands for LUMO

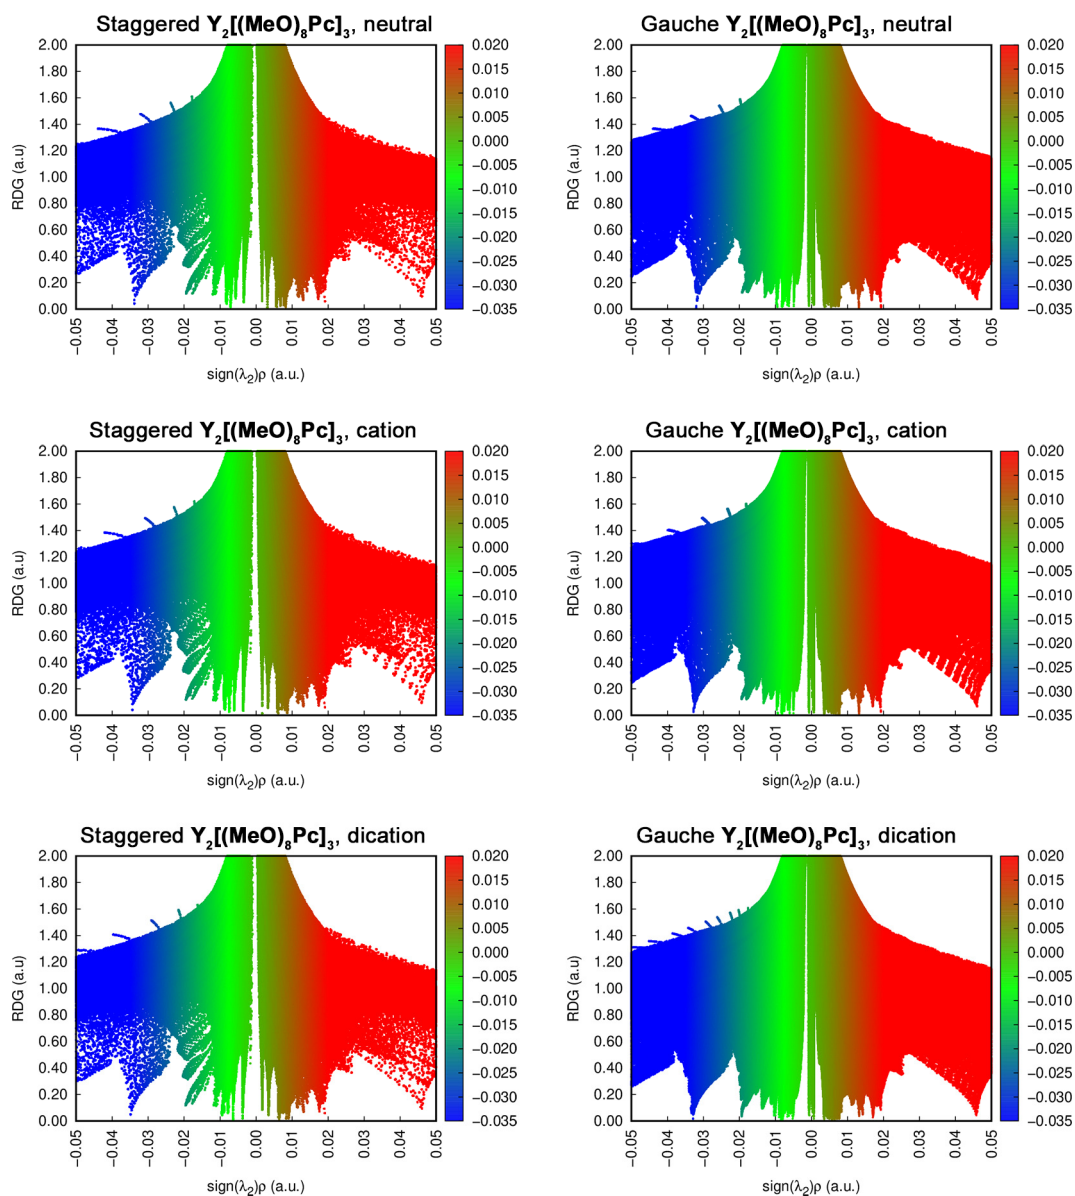

**Figure S10.** RDG vs.  $\text{sign}(\lambda_2)\rho$  plots for staggered and gauche conformations of redox-forms of  $\text{Y}_2[(\text{MeO})_8\text{Pc}]_3$ .

Table S7. BP86/def2-SVP geometry of *s*-Y<sub>2</sub>[(MeO)<sub>8</sub>Pc]<sub>3</sub>.

|   |                   |                   |                   |   |                    |                   |                   |
|---|-------------------|-------------------|-------------------|---|--------------------|-------------------|-------------------|
| C | -4.19022374357489 | -0.70694999595402 | 3.19212065920735  | C | 7.47219579611046   | -3.61357023921068 | -0.00056229788096 |
| C | -4.19024149117518 | 0.70697895597704  | 3.19207007614298  | C | 7.47218295846112   | 3.61365040996167  | -0.0002542791320  |
| C | -2.79408283831429 | 1.12459669558743  | 3.06073968948238  | C | 3.61355413194797   | 7.47220535537777  | 0.00065807984116  |
| C | -2.79406429273401 | -1.12455157324893 | 3.06080559154482  | C | -3.61358466932363  | 7.47220330278022  | -0.00007530652023 |
| C | 2.79385540487487  | 1.12458455790370  | 3.06089968289158  | C | -7.47219487859633  | 3.61363440472851  | -0.00050185142467 |
| C | 4.19001296826811  | 0.70697470962797  | 3.19222275058415  | C | -7.472211112974645 | -3.61354489863591 | 0.00004440440013  |
| C | 4.19003239823189  | -0.70695381934481 | 3.19202373267347  | C | -3.61367918692904  | -7.47217897559722 | 0.00043347438944  |
| C | 2.79385889122695  | -1.12456290963247 | 3.06085168257624  | C | -4.19001123915849  | -0.70698018890046 | -3.19230555822155 |
| C | -1.12467475662178 | -2.79393809761602 | 3.06093599652359  | C | -4.18999333838446  | 0.70694853565772  | -3.19237950456035 |
| C | 1.12447065079768  | -2.79395094164203 | 3.06090008964808  | C | -2.79385039482957  | 1.12455100142733  | -3.06090521111750 |
| C | 0.70685603479697  | -4.19010292548361 | 3.19229487849853  | C | -2.79386894652962  | -1.12459487868182 | -3.06081530396011 |
| C | -0.70707279986007 | -4.19008937370297 | 3.19235069894216  | C | 2.79407720909807   | 1.12456480923909  | -3.06066446700690 |
| C | -0.70707946012578 | 4.19012764250965  | 3.19233308069000  | C | 4.19021913863429   | 0.70695131977387  | -3.19217590361525 |
| C | 0.70685148982098  | 4.19011085392174  | 3.19243292250279  | C | 4.19021843431091   | -0.70697847469252 | -3.19208722036053 |
| C | 1.12445821868947  | 2.79396535622395  | 3.06098058603429  | C | 2.79405987655828   | -1.12457888319991 | -3.06075575389312 |
| C | -1.12469162590879 | 2.79398266565200  | 3.06084751960947  | C | -1.12447570444173  | -2.79397721365621 | -3.06076599932339 |
| C | -1.43567052057089 | -5.38571571855717 | 3.28998674034155  | C | 1.12466906440388   | -2.79396339150196 | -3.06077485758716 |
| C | -0.72169125489876 | -6.59124736989629 | 3.36330361777320  | C | 0.70706949152770   | -4.19012073627325 | -3.1921068065898  |
| C | 0.72143247575701  | -6.59126304060962 | 3.36325721816585  | C | -0.70685814058162  | -4.19013212480444 | -3.19211047460528 |
| C | 1.43543436457268  | -5.38574553917789 | 3.28989086416823  | C | -0.70685484510764  | 4.19009573789653  | -3.19215635833179 |
| C | -5.38591454465207 | 1.43554398686599  | 3.28937819842589  | C | 0.70707473280094   | 4.19010787674617  | -3.19205955888813 |
| C | -6.59144143720471 | 0.72153056200963  | 3.36249751152265  | C | 1.12468505882703   | 2.79395096954309  | -3.06070866226266 |
| C | -6.59141549929537 | -0.72158948184516 | 3.36256131944108  | C | -1.12446497153764  | 2.79394013251820  | -3.06083216775544 |
| C | -5.38586237490538 | -1.43555762235093 | 3.28949444532403  | C | -1.43543155310469  | -5.38578334922837 | -3.28962733334047 |
| C | 5.38568121691892  | -1.43553783054905 | 3.28944099061871  | C | -0.72142501394060  | -6.59130430782865 | -3.36289569264487 |
| C | 6.59123941151716  | -0.72154716220686 | 3.36225922315228  | C | 0.72169948217247   | -6.59128363177777 | -3.36295637606161 |
| C | 6.59125644632612  | 0.72156998220400  | 3.36196371608728  | C | 1.43567355462731   | -5.38574636497172 | -3.28969338739512 |
| C | 5.38569407055720  | 1.43556109793622  | 3.28922961824133  | C | -5.38562179916924  | 1.43555468989485  | -3.28990610626618 |
| C | 1.43545041208183  | 5.38574301934509  | 3.28996297372292  | C | -6.59116436236137  | 0.72158397172806  | -3.36312240037793 |
| C | 0.72147472408293  | 6.59128242985640  | 3.36318968795449  | C | -6.59118741180776  | -0.72153733534139 | -3.36305461505429 |
| C | -0.72164225507247 | 6.59130536790187  | 3.36307550403911  | C | -5.38566996468101  | -1.43554806688640 | -3.28976691555751 |
| C | -1.43565024479782 | 5.38578703772042  | 3.28976715121368  | C | 5.38583490983947   | -1.43557574684444 | -3.28982786281645 |
| C | -2.68272018790727 | -7.86733697687025 | 3.78032151215083  | C | 6.59138697601230   | -0.72159957745553 | -3.36285372754210 |
| C | 2.68248322190000  | -7.86741131161268 | 3.77998578074335  | C | 6.59143313072595   | 0.72152014913086  | -3.36238972159422 |
| C | 7.86733544223236  | -2.68247765766412 | 3.77967013751302  | C | 5.38589662417426   | 1.43552801765822  | -3.28934825090651 |
| C | 7.86724218895634  | 2.68248749920671  | 3.77978043671744  | C | 1.43565198924145   | 5.38577213966196  | -3.28933851469227 |
| C | 2.68243284968338  | 7.86726993209167  | 3.78082172862986  | C | 0.72165043228168   | 6.59130721553325  | -3.36244510021211 |
| C | -2.68260695130446 | 7.86733093330858  | 3.78055833648869  | C | -0.72146758893145  | 6.59129155942806  | -3.36253877478574 |
| C | -7.86753449774789 | 2.68248785408038  | 3.77980013793906  | C | -1.43544839081748  | 5.38574154516497  | -3.28952256571425 |
| C | -7.86743783483532 | -2.68257263626333 | 3.77995623654002  | C | -2.68246270231754  | -7.86746134062009 | -3.77965019245155 |
| C | -2.44740831580725 | -3.44546889438366 | 0.00013661227833  | C | 2.68274787688195   | -7.86739470324756 | -3.77980953138688 |
| C | -3.44547182237745 | -2.44739033929571 | 0.00005050159751  | C | 7.86740587279607   | -2.68245802836558 | -3.78088249790358 |
| C | -2.75920122357768 | -1.16870900955386 | -0.00001629839522 | C | 7.86738021258915   | 2.68241601072178  | -3.78044276027642 |
| C | -1.16871836309984 | -2.75921091594537 | 0.00008441420822  | C | 2.68260827991202   | 7.86738339162683  | -3.77979773846068 |
| C | 1.16870651719267  | 2.75921041831966  | 0.00015433990460  | C | -2.68240539357181  | 7.86732812434242  | -3.78010775720590 |
| C | 2.44738911981005  | 3.44547680463482  | 0.00024501606866  | C | -7.86713415297747  | 2.68255880837317  | -3.78072465491603 |
| C | 3.44546281860786  | 2.44740962398157  | 0.00021881745551  | C | -7.86724574644756  | -2.68250960071638 | -3.78040638365585 |
| C | 2.75920022045778  | 1.168721183324357 | 0.00013410654258  | H | -2.53269118474039  | -5.35237484304037 | 3.29146401232844  |
| C | 1.16870713817114  | -2.75920765538175 | 0.00012332044580  | H | 2.53245577310072   | -5.35242448183239 | 3.29135719782338  |
| C | 2.75919378718480  | -1.16870751170482 | 0.00009487970522  | H | -5.35262257468922  | 2.53256673721153  | 3.29069170048068  |
| C | 3.44546267561807  | -2.44739120704802 | 0.00005182999938  | H | -5.35251471877712  | -2.53257819671285 | 3.29089566351564  |
| C | 2.44739684729484  | -3.44546749181229 | 0.00009448388143  | H | 5.35236972390317   | -2.53255854873171 | 3.29065111168045  |
| C | -3.44547423288072 | 2.44740832489049  | -0.00016167949861 | H | 5.35245042167497   | 2.53258343166259  | 3.28955098749523  |
| C | -2.44740146762394 | 3.44547751296555  | -0.00007975411167 | H | 2.53247144344972   | 5.35240352310184  | 3.29140805309614  |
| C | -1.16871745958002 | 2.75921230991208  | 0.00002157479747  | H | -2.53267322733145  | 5.35249655415195  | 3.29100916145679  |
| C | -2.75920956317861 | 1.16872017888421  | -0.00006956310220 | H | -2.89399247410781  | -7.32628342693694 | 4.72978802370921  |
| C | 2.77491187074415  | -4.80885628261553 | 0.00004660770821  | H | -3.32097250034066  | -7.42996052976739 | 2.98027535887973  |
| C | 4.13278617593572  | -5.15635283142341 | -0.00009257868229 | H | -2.94157204119735  | -8.93596438417835 | 3.89882269437169  |
| C | 5.15637268099394  | -4.13275326211023 | -0.00018454351573 | H | 2.89393061203417   | -7.32636162761288 | 4.72941576937380  |
| C | 4.80885535299095  | -2.77488476146438 | -0.00009373056032 | H | 3.32061911199387   | -7.43005722373177 | 2.97983360733953  |
| C | -4.80886646549797 | -2.77487497875765 | 0.00007544536842  | H | 2.94131994365920   | -8.93604651268947 | 3.89844913017622  |
| C | -5.15639158517214 | -4.13274103331875 | 0.00020499255553  | H | 8.93597385193375   | -2.94134438881117 | 3.89803833765440  |
| C | -4.13280909106984 | -5.15634438242100 | 0.00031173337994  | H | 7.42979220070178   | -3.32094910619293 | 2.97988680419657  |
| C | -2.77493276866517 | -4.80885561094612 | 0.00025565917317  | H | 7.32642430772352   | -2.89343925079641 | 4.72928549830307  |
| C | 4.80884962606789  | 2.77492435579172  | 0.00022632947514  | H | 8.93585243966248   | 2.94135606402120  | 3.89840036982069  |
| C | 5.15634816939311  | 4.13279849248891  | 0.00034590764502  | H | 7.42986657678109   | 3.32102327739038  | 2.97995535222890  |
| C | 4.13275007847437  | 5.15638589509075  | 0.00044018123580  | H | 7.32613310204550   | 2.89336337609768  | 2.89330051809471  |
| C | 2.77488160642704  | 4.80886886879203  | 0.00036806971571  | H | 2.94128435271184   | 8.93587465641161  | 3.89953248216369  |
| C | -2.77490072957930 | 4.80886844495577  | -0.00017071778103 | H | 3.32089624941988   | 7.43000918702825  | 2.98087899292607  |
| C | -4.13277021712729 | 5.15638091400469  | -0.00034812352625 | H | 2.89342768185375   | 7.32605265294531  | 4.73025434876824  |
| C | -5.15636630383270 | 4.13279134397430  | -0.00044953668364 | H | -2.94143050443825  | 8.93593424468873  | 3.89934383851016  |
| C | -4.80886381507647 | 2.77491746560344  | -0.00034318921984 | H | -3.32097232761937  | 7.43018266889237  | 2.98047420054836  |
| C | 3.61364480422054  | -7.47218609852605 | 0.00000392240464  | H | -2.89376714193132  | 7.32602342833604  | 4.72990297838520  |

|   |                   |                   |                   |   |                    |                   |                   |
|---|-------------------|-------------------|-------------------|---|--------------------|-------------------|-------------------|
| H | -7.32642586431528 | 2.89364196525952  | 4.72926002796487  | H | 3.32104696444947   | 7.43005551191534  | -2.97987139379279 |
| H | -7.43021627686590 | 3.32085005664575  | 2.97980682315721  | H | -2.94125429885205  | 8.93594865087077  | -3.89867315217305 |
| H | -8.93615829540700 | 2.94131340133421  | 3.89839440617339  | H | -2.89328574028136  | 7.32627611232104  | -4.72966114584536 |
| H | -7.32639923892487 | -2.89360651668986 | 4.72948294635884  | H | -3.320946788391107 | 7.42994066927782  | -2.98029772752687 |
| H | -7.43001209982648 | -3.32098081351212 | 2.98005995353700  | H | -7.42984604078828  | 3.32097568874461  | -2.98075990106262 |
| H | -8.93605715290914 | -2.94144576173221 | 3.89848437897732  | H | -7.32594092408700  | 2.89359156908669  | -4.73016377063191 |
| H | 1.97345520700759  | -5.55713188042821 | 0.00009182954319  | H | -8.93573641891488  | 2.94141934345571  | -3.89943274844017 |
| H | 5.55711939298735  | -1.97341788716889 | -0.00017319273340 | H | -7.43001073125902  | -3.32083989820431 | 2.92346093819525  |
| H | -5.55712358946331 | -1.97340122596146 | -0.0000590150245  | H | -7.32604276370747  | -2.89370524957389 | -4.72980360466320 |
| H | -1.97348382390645 | -5.55713940028751 | 0.00034889398732  | H | -8.93585884206818  | -2.94133295330961 | -3.89910006290335 |
| H | 5.55712778706858  | 1.97347134130863  | 0.00016847378910  | N | -1.99887283639732  | 0.00002298023294  | 2.92340525324838  |
| H | 1.97341508673404  | 5.55713342443232  | 0.00043009094747  | N | 1.99865526086796   | 0.00001212319291  | 2.92352870878338  |
| H | -1.97343970733933 | 5.55713878232026  | -0.00009799062786 | N | -0.00010064005497  | -1.99876098794972 | 2.92346093819525  |
| H | -5.55713695332231 | 1.97345859818063  | -0.00043294472943 | N | -0.00011427117778  | 1.99878764806896  | 2.92347782376924  |
| H | 2.96015647732355  | -7.42679486896936 | 0.89850157102598  | N | -2.39946109200766  | -2.39933434031848 | 3.09391507782121  |
| H | 2.95983284026148  | -7.42686079822711 | -0.89826090316202 | N | -2.39948189432390  | 2.39938270802657  | 3.09379486373004  |
| H | 4.17026711904783  | -8.42725415659883 | -0.00006451309033 | N | 2.39924542680924   | 2.39936449908418  | 3.09401224299909  |
| H | 7.42701782954673  | -2.95993299916918 | 0.89783880478418  | N | 2.39926128078677   | -2.39935250301797 | 3.09386381690804  |
| H | 7.42663109571705  | -2.95991294444854 | -0.89892861715344 | N | -1.37631664591368  | -1.37632250115782 | 0.00002025369096  |
| H | 8.42727331738054  | -4.17017647913040 | -0.00077313396742 | N | 1.37631228915794   | 1.37632495666648  | 0.00011604148006  |
| H | 8.42725126693396  | 4.17027279604544  | -0.00006411598077 | N | 1.37630784603961   | -1.37631908029583 | 0.00014140630020  |
| H | 7.42666102414297  | 2.96021050599271  | -0.89855294771949 | N | -1.37632214539881  | 1.37632614225406  | 0.00004312227833  |
| H | 7.42698813765921  | 2.95979528559235  | 0.89821458985037  | N | -0.0000484810756   | -3.39420924220700 | 0.00012669448909  |
| H | 4.17015296035358  | 8.42728668790829  | 0.00081946240048  | N | -3.39420306795482  | 0.00000450485021  | -0.00007398863403 |
| H | 2.95994641570740  | 7.42696430160013  | -0.89776100558128 | N | -0.00000509330345  | 3.39421101457975  | 0.00010301853862  |
| H | 2.95986895638864  | 7.42669516934738  | 0.89900450348949  | N | 3.39419376873714   | 0.00000655666499  | 0.00011429666039  |
| H | -4.17018832744338 | 8.42728182526883  | -0.00006672731726 | N | -1.99867282310244  | -0.00002165413451 | -2.92341523047307 |
| H | -2.95969257304051 | 7.42699518467780  | -0.89828895197690 | N | 1.99887954157105   | -0.00000785678335 | -2.92327399241041 |
| H | -2.96018315169000 | 7.42666873342778  | 0.89847684788637  | N | 0.00009403263825   | -1.99878145289234 | -2.92333326377604 |
| H | -8.42726777125566 | 4.17024776173086  | -0.00055771186890 | N | 0.00010480897905   | 1.99874957141020  | -2.92338090668343 |
| H | -7.42683847596573 | 2.95988920819311  | -0.89881501166982 | N | -2.39926362723267  | -2.39938053961434 | -3.09380801520261 |
| H | -7.42681862316864 | 2.96008317520623  | 0.89795080863275  | N | -2.39924637370050  | 2.39933515176380  | -3.09394720113042 |
| H | -7.42689548403141 | -2.95972643130997 | 0.89830543832997  | N | 2.39947386671153   | 2.39935123751741  | -3.09370014540422 |
| H | -7.42677610726820 | -2.96006799020729 | -0.89845933600832 | N | 2.39945487900866   | -2.39936285395399 | -3.09379925875681 |
| H | -8.42729216367637 | -4.17014515227557 | 0.00009175437636  | O | -1.30321837759655  | -7.82242959443663 | 3.45490375632523  |
| H | -2.95999174844802 | -7.42676134899262 | 0.89878444039941  | O | 1.30293206701697   | -7.82246051593364 | 3.45479358057136  |
| H | -2.96006503193460 | -7.42688522469880 | -0.89797825371021 | O | 7.82242543984710   | -1.30307150138222 | 3.45384432260011  |
| H | -4.17030486723317 | -8.42724528980974 | 0.00052075229761  | O | 7.82241940097981   | 1.30310526133406  | 3.45382571256040  |
| H | -2.53245284591626 | -5.35247131401752 | -3.29101682325131 | O | 1.30301829024045   | 7.82244330144223  | 3.45501527518247  |
| H | 2.53269354160010  | -5.35239287418661 | -3.29124232045389 | O | -1.30315088316225  | 7.82247754855157  | 3.45494494842790  |
| H | -5.35227363868376 | 2.53257542877215  | -3.29132514171891 | O | -7.82262813262682  | 1.30303299763061  | 3.45418635069838  |
| H | -5.35237501583826 | -2.53257047899970 | -3.29106618920655 | O | -7.82258315541622  | -1.30313914968393 | 3.45422912918621  |
| H | 5.35250833687167  | -2.53259675838654 | -3.29119626249355 | O | 4.58906851013346   | -6.43979119907156 | -0.00019881349466 |
| H | 5.35267970143621  | 2.53255224262006  | -3.28954094591550 | O | 6.43981884271223   | -4.58901487175321 | -0.00036501309554 |
| H | 2.53267439831955  | 5.35247385522680  | -3.29062569680837 | O | 6.43978771570887   | 4.58907741848892  | 0.00036361326565  |
| H | -2.53246951946895 | 5.35241150441315  | -3.29096948823345 | O | 4.58900699386291   | 6.43983320364798  | 0.00054488130534  |
| H | -3.32062711639201 | -7.43006629187854 | -2.97954330313890 | O | -4.58903160855171  | 6.43982634879786  | -0.00050471305927 |
| H | -2.89386668455257 | -7.32645223791066 | -4.72911321579180 | O | -6.43980692019599  | 4.58906694896179  | -0.00060452113346 |
| H | -2.94130213367816 | -8.93610013322170 | -3.89807588298531 | O | -6.43983959651833  | -4.58899589648822 | 0.00028638863990  |
| H | 3.32097843651535  | -7.42993991655675 | -2.97978945563616 | O | -4.58909772470841  | -6.43978073687634 | 0.00039905989593  |
| H | 2.89403229398561  | -7.32642387637353 | -4.72931997818024 | O | -1.30292392798141  | -7.82250469941755 | -3.45440127894931 |
| H | 2.94161172809143  | -8.93603028297535 | -3.89820917744361 | O | 1.30323670751726   | -7.82247153145581 | -3.45442654064810 |
| H | 8.93602079455883  | -2.94127791824601 | -3.89956336215726 | O | 7.82255043230001   | -1.30313275353992 | -3.45469755875127 |
| H | 7.32629473701162  | -2.89319331336210 | -4.73043461494519 | O | 7.82258538080924   | 1.30302059907296  | -3.45455129430854 |
| H | 7.43007932809199  | -3.32113776907354 | -2.98114772550208 | O | 1.30317914518451   | 7.82249205304819  | -3.45404794421643 |
| H | 8.93596489453362  | 2.94123109220970  | -3.89940524795615 | O | -1.30301949655839  | 7.82246551009208  | -3.45416045345591 |
| H | 7.32597777931353  | 2.89338652602945  | -4.72977601702448 | O | -7.82232033748144  | 1.30312685266012  | -3.45498406104800 |
| H | 7.43032014041129  | 3.32092738582186  | -2.98042403466382 | O | -7.82236641287235  | -1.30303926771526 | -3.45485041033560 |
| H | 2.94144102811312  | 8.93600624117716  | -3.89837757425214 | Y | -0.00006788028021  | 0.00001376858297  | 1.70131735226762  |
| H | 2.89364676458287  | 7.32629135592689  | -4.72929338268616 | Y | 0.00005688735274   | -0.00000350089957 | -1.70121407132855 |

Table S8. BP86/def2-SVP geometry of  $s\text{-Y}_2[(\text{MeO})_8\text{Pc}]^{3+}$ .

|   |                   |                   |                   |   |                   |                   |                   |
|---|-------------------|-------------------|-------------------|---|-------------------|-------------------|-------------------|
| C | -4.19205689394472 | -0.70670659425200 | 3.16067110350712  | C | 3.62172187639943  | -7.47752028133798 | 0.00034797607609  |
| C | -4.19205776308625 | 0.70664883869617  | 3.16066286307295  | C | 7.47752026890604  | -3.62165283952837 | 0.00031901852086  |
| C | -2.79478069757771 | 1.12433664975361  | 3.02842688030112  | C | 7.47749536128936  | 3.62172142686373  | 0.00025770681181  |
| C | -2.79478441295441 | -1.12439699407973 | 3.02840721332501  | C | 3.62159344772330  | 7.47750664227047  | 0.00027408597478  |
| C | 2.79428139908240  | 1.12434276429500  | 3.02877919550720  | C | -3.62163748915894 | 7.47749549790436  | 0.00036999133880  |
| C | 4.19157451163487  | 0.70665698351394  | 3.16083766626771  | C | -7.47750131168106 | 3.62167971396240  | 0.00086195250040  |
| C | 4.19155348923577  | -0.70669842549311 | 3.16108256970939  | C | -7.47753244029660 | -3.62161259037432 | 0.00062121466438  |
| C | 2.79429632724664  | -1.12439602162629 | 3.02870100093809  | C | -3.62177760098287 | -7.47751269763319 | 0.00008773038355  |
| C | -1.12461540673505 | -2.79456705381915 | 3.02853232484613  | C | -4.19155174002897 | -0.70667821954266 | -3.16099617350716 |
| C | 1.12412203029568  | -2.79456227398328 | 3.02869274430266  | C | -4.19154630926482 | 0.70667416755825  | -3.16097723772591 |
| C | 0.70642299821579  | -4.19183385013702 | 3.16093589114300  | C | -2.79427488629598 | 1.12436035650450  | -3.02873177798131 |
| C | -0.70693144547444 | -4.19183748845170 | 3.16082244732386  | C | -2.79428375419281 | -1.12437537698465 | -3.02874473460126 |
| C | -0.70693381015136 | 4.19180084860298  | 3.16056370381138  | C | 2.79476640475784  | 1.12435296774705  | -3.02853040366903 |
| C | 0.70642174110255  | 4.19181218044288  | 3.16060270487347  | C | 4.19204657916580  | 0.70668214056986  | -3.16071574041453 |
| C | 1.12412400413007  | 2.79452302531970  | 3.02853856780600  | C | 4.19204470619786  | -0.70667150734167 | -3.16094994010781 |
| C | -1.12461047353348 | 2.79451153118875  | 3.02844831609002  | C | 2.79480118785789  | -1.12437720262442 | -3.02843138874519 |
| C | -1.43684293241613 | -5.38480998332676 | 3.26723113873617  | C | -1.12411197130237 | -2.79453648826463 | -3.02876378184241 |
| C | -0.72243946558510 | -6.59144276158580 | 3.34977081641255  | C | 1.12462286357524  | -2.79453176134185 | -3.02864491345352 |
| C | 0.72190934590599  | -6.59144202076916 | 3.34986610178912  | C | 0.70694135440593  | -4.19178061306423 | -3.16114997230838 |
| C | 1.43632214626973  | -5.38480659007227 | 3.26743228107741  | C | -0.70641145337421 | -4.19179095766061 | -3.16116710595770 |
| C | -5.38501586403484 | 1.43655018349085  | 3.26733089650809  | C | -0.70641361657398 | 4.19180364573951  | -3.16087715471414 |
| C | -6.59163133264028 | 0.72213658120102  | 3.35004941648650  | C | 0.70693947537572  | 4.19179593008972  | -3.16079320096641 |
| C | -6.59163012762011 | -0.72221030774879 | 3.35003816005066  | C | 1.12461531149226  | 2.79452765373705  | -3.02850491180231 |
| C | -5.38501039156106 | -1.43661643683914 | 3.26731902963194  | C | -1.12411331551536 | 2.79453271188175  | -3.02863307293882 |
| C | 5.38454406502253  | -1.43660900628240 | 3.26724624164614  | C | -1.43630483658999 | -5.38474579037684 | -3.26791000299585 |
| C | 6.59117227606209  | -0.72220391964596 | 3.34983146841430  | C | -0.72188544466026 | -6.59136152646239 | -3.35057830357635 |
| C | 6.59114976492630  | 0.72213962961160  | 3.35015599097771  | C | 0.72246351428615  | -6.59135985438183 | -3.35041761913081 |
| C | 5.38452606471970  | 1.43655210277267  | 3.26755836016675  | C | 1.43686033350738  | -5.38473567088771 | -3.26770329582314 |
| C | 1.43630888285853  | 5.38479577774809  | 3.26703055322973  | C | -5.38450515747754 | 1.43658782739251  | -3.26747682947738 |
| C | 0.72188444722692  | 6.59142840799474  | 3.34942689581010  | C | -6.59114285190390 | 0.72218814871695  | -3.34999379342175 |
| C | -0.72245707329416 | 6.59141290823237  | 3.34939522363968  | C | -6.59115074367850 | -0.72215703255514 | -3.34999377470450 |
| C | -1.43685124733203 | 5.38476816392610  | 3.26695183678802  | C | -5.38452232286409 | -1.43657347395504 | -3.26749525380961 |
| C | -2.67934047279034 | -7.87003425106674 | 3.79180883026807  | C | 5.38503624516721  | -1.43655655389710 | -3.26733525137188 |
| C | 2.67876143915674  | -7.87004153400318 | 3.79209905461755  | C | 6.59162824551161  | -0.72212085296187 | -3.35021852413201 |
| C | 7.86978367907088  | -2.67917878624456 | 3.79147392093263  | C | 6.59157614432831  | 0.72222491075578  | -3.35057741761229 |
| C | 7.86983794555651  | 2.67902374885556  | 3.79201014055523  | C | 5.38495641582575  | 1.43661015710620  | -3.26769884718245 |
| C | 2.67873554874773  | 7.87011579030206  | 3.79143606493939  | C | 1.43686489852659  | 5.38474554855647  | -3.26732586001494 |
| C | -2.67933817595463 | 7.87004904762848  | 3.79141827871279  | C | 0.72247363800699  | 6.59137879952345  | -3.34996382063306 |
| C | -7.87023408527060 | 2.67899233282953  | 3.79228580463136  | C | -0.72186971901005 | 6.59139300943334  | -3.35004726505162 |
| C | -7.87022518942614 | -2.67909511439519 | 3.79216616463242  | C | -1.43629908509797 | 5.38477359054749  | -3.26748014323208 |
| C | -2.44912710170178 | -3.44688415082319 | 0.00007120581105  | C | -2.67874883855102 | -7.86993549965967 | -3.79284591690493 |
| C | -3.44686528999188 | -2.44912781889474 | 0.00006973367518  | C | 2.67937738673064  | -7.86986623538541 | -3.79265204850293 |
| C | -2.75887473678312 | -1.16912440532254 | -0.00003304604642 | C | 7.87021863270048  | -2.67903203985653 | -3.79219720902331 |
| C | -1.16911134084711 | -2.75890604156799 | 0.00001901938986  | C | 7.87015117859681  | 2.67910314716609  | -3.79278197449010 |
| C | 1.16911202142189  | 2.75885119540086  | 0.00025891019462  | C | 2.67935685557484  | 7.86994876601364  | -3.79214642343032 |
| C | 2.44911536339375  | 3.44684243437056  | 0.00041087366864  | C | -2.67869620954630 | 7.87003291882458  | -3.79227670364546 |
| C | 3.44687132987714  | 2.44910426908145  | 0.00046167435193  | C | -7.86977493955115 | 2.67912872880550  | -3.79173702589200 |
| C | 2.75889271740752  | 1.16908992835571  | 0.00036021058273  | C | -7.86979647825373 | -2.67906043212037 | -3.79186364665523 |
| C | 1.16910889841264  | -2.75890024014460 | 0.00021865614461  | H | -2.53374714459742 | -5.35236902890040 | 3.27637682067691  |
| C | 2.75887947900461  | -1.16912659115549 | 0.00034764877414  | H | 2.53322529748986  | -5.35236547401975 | 3.27669323792797  |
| C | 3.44686551523679  | -2.44913118151840 | 0.00045852106034  | H | -5.35256188380743 | 2.53345302410035  | 3.27680472710252  |
| C | 2.44912232351495  | -3.44688145324653 | 0.00039726049910  | H | -5.35254482550711 | -2.53351851281840 | 3.27678873874564  |
| C | -3.44685926102884 | 2.44910291180405  | 0.00015868222530  | H | 5.35205771560780  | -2.53350896260915 | 3.27691681069007  |
| C | -2.44910806814046 | 3.44684580066682  | 0.00017389288385  | H | 5.35201119017294  | 2.53344561411766  | 3.27785002088038  |
| C | -1.16910347349523 | 2.75885619276088  | 0.00007903386208  | H | 2.53321158887233  | 5.35235133465370  | 3.27650885522843  |
| C | -2.75887941705874 | 1.16909039451772  | 0.00000207721708  | H | -2.53375352220942 | 5.35229906911775  | 3.27639226183599  |
| C | 2.77379000069385  | -4.80959827465704 | 0.00042544210028  | H | -2.88504125025502 | -7.32309119799700 | 4.73815381698853  |
| C | 4.13359838258808  | -5.15778092675552 | 0.00050359982531  | H | -3.32428560288731 | -7.44491269345564 | 2.99108884333942  |
| C | 5.15778936039212  | -4.13357827951730 | 0.00055476958481  | H | -2.92722587639104 | -8.93927874262912 | 3.92148604664778  |
| C | 4.80958638471203  | -2.77377743959107 | 0.00053857406291  | H | 2.88437346849697  | -7.32311169306104 | 4.73847110844130  |
| C | -4.80958944456853 | -2.77375798226581 | 0.00015655692705  | H | 3.32378447060636  | -7.44491084929357 | 2.99144648052648  |
| C | -5.15780660354506 | -4.13355525889623 | 0.00022967956765  | H | 2.92663220007651  | -8.93928811812289 | 3.92178660858546  |
| C | -4.13362458349365 | -5.15776520726621 | 0.00018702184793  | H | 8.93904845756659  | -2.92711161237408 | 3.92089676248977  |
| C | -2.77381215760377 | -4.80959728820999 | 0.00011738794989  | H | 7.44452488394150  | -3.32405243867717 | 2.99076907560737  |
| C | 4.80958612208801  | 2.77377872346946  | 0.00047055992600  | H | 7.32296480797127  | -2.88494844358499 | 4.73787393172857  |
| C | 5.15775703240732  | 4.13359813142690  | 0.00040974605342  | H | 8.93911682234942  | 2.92689050195697  | 3.92145014379584  |
| C | 4.13354691478546  | 5.15778180244056  | 0.00038444003903  | H | 7.44458293803641  | 3.32410181817709  | 2.99146580674906  |
| C | 2.77374835732473  | 4.80956600517951  | 0.00039198293943  | H | 7.32305457247426  | 2.88459162163338  | 4.73847434022168  |
| C | -2.77375945163569 | 4.80956534665837  | 0.00027008413339  | H | 2.92659182418159  | 8.93939499786988  | 3.92089004794164  |
| C | -4.13356252318045 | 5.15776477451122  | 0.00038204839436  | H | 3.32385362790565  | 7.44486371809102  | 2.99092176784288  |
| C | -5.15776384699187 | 4.13357339854498  | 0.00041689114788  | H | 2.88426213879043  | 7.32333902421500  | 4.73791243504640  |
| C | -4.80957688020236 | 2.77376592159831  | 0.00029317188576  | H | -2.92722066047035 | 8.93932196723005  | 3.92087514961909  |

|   |                   |                   |                   |   |                   |                   |                    |
|---|-------------------|-------------------|-------------------|---|-------------------|-------------------|--------------------|
| H | -3.32447352931555 | 7.44477465924722  | 2.99093072182807  | H | 2.88483320022819  | 7.32291538596979  | -4.73848171136758  |
| H | -2.88480916200211 | 7.32327134506969  | 4.73790578867296  | H | 3.32447533601643  | 7.44495506998092  | -2.99149655227948  |
| H | -7.32313008335356 | 2.88461152889060  | 4.73855467874424  | H | -2.92653605239435 | 8.93927730018014  | -3.92205931157196  |
| H | -7.44530220238316 | 3.32405806799277  | 2.99156206954510  | H | -2.88419481702359 | 7.32300561636938  | -4.73861132392727  |
| H | -8.93946912207964 | 2.92680803892052  | 3.92218124657739  | H | -3.32383578225980 | 7.44506693750004  | -2.99162781768688  |
| H | -7.32316678889810 | -2.88477099791697 | 4.73844951701833  | H | -7.44452304658666 | 3.32405067114460  | -2.99106895795159  |
| H | -7.44523855806185 | -3.32409554651564 | 2.99141999713654  | H | -7.32296642242266 | 2.88482670815016  | -4.73816025720763  |
| H | -8.93946253713441 | -2.92693619031217 | 3.92199119156423  | H | -8.93903491525220 | 2.92703276759721  | -3.92125151260132  |
| H | 1.97381381387713  | -5.55929360536352 | 0.00034360855289  | H | -7.44460518720022 | -3.32404421596329 | -2.99121227856928  |
| H | 5.55927195034847  | -1.97379175854671 | 0.00055957534802  | H | -7.32293889299274 | -2.88470784894362 | -4.73826917261347  |
| H | -5.55926252802738 | -1.97376092799492 | 0.00018814920253  | H | -8.93905432630083 | -2.92693573187329 | -3.921452595993802 |
| H | -1.97384822547800 | -5.55930615594986 | 0.00012124007547  | N | -1.99786355791077 | -0.00003223271356 | 2.89652521564399   |
| H | 5.55929406933161  | 1.97382075651837  | 0.00050155762717  | N | 1.99736874981121  | -0.00003072591158 | 2.89687938224072   |
| H | 1.97375435400337  | 5.55924193763497  | 0.00034530935018  | N | -0.00024123855213 | -1.99765029626928 | 2.89669912580486   |
| H | -1.97377864771074 | 5.55925563767205  | 0.00028563679996  | N | -0.00023344954621 | 1.99758634106494  | 2.89669487463807   |
| H | -5.55927142760603 | 1.97378856620750  | 0.00033410321073  | N | -2.39957629277539 | -2.39935540584380 | 3.06032754971512   |
| H | 2.96996858952487  | -7.43582811757083 | 0.89966741083345  | N | -2.39957033196710 | 2.39929659791934  | 3.06028249049956   |
| H | 2.97017262028806  | -7.43576281058818 | -0.89911739044228 | N | 2.39907899354260  | 2.39930971098895  | 3.06051152850960   |
| H | 4.18739176551577  | -8.42651639353366 | 0.00037819693109  | N | 2.39908017716323  | -2.39935177756038 | 3.06062156076548   |
| H | 7.43585871079971  | -2.96986069137322 | 0.89960716975115  | N | -1.37538010221394 | -1.37540522023918 | -0.00002743906818  |
| H | 7.43571140177085  | -2.97014108429824 | -0.89916967372472 | N | 1.37539252347225  | 1.37535667719410  | 0.00027818556161   |
| H | 8.42652687180913  | -1.8730462025553  | 0.0003308168020   | N | 1.37538154309122  | -1.37540165016695 | 0.00023865783604   |
| H | 8.42649252526793  | 4.18739039121126  | 0.00023582011291  | N | -1.37538088377401 | 1.37535848832550  | 0.00000702967441   |
| H | 7.43574166439821  | 2.97010135251326  | -0.89915520091559 | N | -0.00000001929311 | -3.39431648780267 | 0.00015127311166   |
| H | 7.43580845271713  | 2.97005115288059  | 0.89963517864585  | N | -3.39429346246167 | -0.00001704520442 | 0.00000661792528   |
| H | 4.18723515841757  | 8.42651997129355  | 0.00030677303508  | N | 0.00000499759025  | 3.39426720746640  | 0.00021386605969   |
| H | 2.96996052260959  | 7.43579865637304  | -0.89912924682787 | N | 3.39429969238028  | -0.00002084131037 | 0.00043917775430   |
| H | 2.96993700037168  | 7.43573502158886  | 0.89965595783531  | N | -1.99736734251196 | -0.00001206900313 | -2.89679880262366  |
| H | -4.18729019237046 | 8.42650237343924  | 0.00053305263799  | N | 1.99787820989847  | -0.00001989495771 | -2.89647724676471  |
| H | -2.97014586321306 | 7.43583297962234  | -0.89913894471001 | N | 0.00024671903999  | -1.99764014786403 | -2.89664744356791  |
| H | -2.96983722209753 | 7.43569433242301  | 0.89964645789747  | N | 0.00024508490629  | 1.99761748065279  | -2.89662196469494  |
| H | -8.42650089687844 | 4.18734478766274  | 0.00115809253657  | N | -2.39906680773476 | -2.39932633699913 | -3.06070398508584  |
| H | -7.43607510276924 | 2.97003099445381  | -0.89854345646554 | N | -2.39906512491430 | 2.39931720751861  | -3.06060583229887  |
| H | -7.43547943699519 | 2.97003494686151  | 0.90024300386850  | N | 2.39956382679112  | 2.39930949767597  | -3.06040636462155  |
| H | -7.43552637659813 | -2.96997947117439 | 0.90001137787489  | N | 2.39958063507392  | -2.39932276144038 | -3.06047950325421  |
| H | -7.43605583976992 | -2.96994375920867 | -0.89876853258135 | O | -1.29978547153783 | -7.81730795009906 | 3.45526470131828   |
| H | -8.42654250575079 | -4.18725846608696 | 0.00087859289560  | O | 1.29924005368749  | -7.81730835765881 | 3.45542198701606   |
| H | -2.97002044289988 | -7.43581374861323 | 0.89940427479201  | O | 7.81705022197258  | -1.29957791930173 | 3.45510300894290   |
| H | -2.97022939316486 | -7.43578179269658 | -0.89937986359347 | O | 7.81704389932696  | 1.29950620150282  | 3.45531522060182   |
| H | -4.18746027259762 | -8.42650120821650 | 0.00013688424820  | O | 1.29923387650658  | 7.81732120545884  | 3.45467284502993   |
| H | -2.53320658689941 | -5.35229552194296 | -3.27732747893379 | O | -1.29984466242729 | 7.81729344535377  | 3.45460494417087   |
| H | 2.53376572520462  | -5.35229641753308 | -3.27670546599958 | O | -7.81749870774464 | 1.29947727763883  | 3.45557407339726   |
| H | -5.35203079656983 | 2.53348845348443  | -3.27695332118494 | O | -7.81749504192223 | -1.29955534464163 | 3.45555430923784   |
| H | -5.35206952244511 | -2.53347488714927 | -3.27695850397019 | O | 4.58998466282074  | -6.43502318105166 | 0.00049004645210   |
| H | 5.35259381939232  | -2.53345823235643 | -3.27700293577101 | O | 6.43503937937859  | -4.58993958020825 | 0.00053249305324   |
| H | 5.35241527435179  | 2.53350232406422  | -3.27803405658022 | O | 6.43499811819400  | 4.58998736049351  | 0.00032570990762   |
| H | 2.53376724231733  | 5.35228398700398  | -3.27669716205123 | O | 4.58989471695403  | 6.43503636319648  | 0.00026462387304   |
| H | -2.53320092739571 | 5.35233882461366  | -3.27701129610642 | O | -4.58992442172908 | 6.43501454814544  | 0.00045748360314   |
| H | -3.32372539798642 | -7.44497410415879 | -2.99206502084794 | O | -6.43500836271383 | 4.58995156314070  | 0.00054813907435   |
| H | -2.88444703977400 | -7.32283752759749 | -4.73910224966750 | O | -6.43505993536845 | -4.58990714857779 | 0.00031607540593   |
| H | -2.92659590332138 | -8.93916593992419 | -3.92271263903828 | O | -4.59002465127022 | -6.43500265437915 | 0.00021221295961   |
| H | 3.32430072627977  | -7.44493617631683 | -2.99181194119647 | O | -1.29920616529263 | -7.81722147189126 | -3.45625700156410  |
| H | 2.88510935253781  | -7.32270842902631 | -4.73886589912946 | O | 1.29981388824419  | -7.81720419799633 | -3.45613105212823  |
| H | 2.92725595129928  | -8.93908343579156 | -3.92256706325970 | O | 7.81750153377469  | -1.29945491477583 | -3.45572495469494  |
| H | 8.93943856102987  | -2.92687347582064 | -3.92217919670166 | O | 7.81744036344681  | 1.29960786843178  | -3.45596369437690  |
| H | 7.32296051313707  | -2.88481825433211 | -4.73833582921718 | O | 1.29986308854306  | 7.81724620424095  | -3.45530446097450  |
| H | 7.44547814528809  | -3.32396170213639 | -2.99125960824921 | O | -1.29921148844757 | 7.81727676745883  | -3.45542499816445  |
| H | 8.93938135714016  | 2.92695455289517  | -3.92266143830154 | O | -7.81702364196722 | 1.29956051133853  | -3.45522705250164  |
| H | 7.32302588875808  | 2.88461879119055  | -4.73905661873354 | O | -7.81703669375979 | -1.29951537064978 | -3.45525987077301  |
| H | 7.44526337565678  | 3.32421985450028  | -2.99207474044696 | Y | -0.00014144262179 | -0.00002242059127 | 1.69268191418957   |
| H | 2.92723837981268  | 8.93918396507128  | -3.92192501862389 | Y | 0.00014808277808  | -0.00001218747869 | -1.69258795229889  |

Table S9. BP86/def2-SVP geometry of  $s\text{-Y}_2[(\text{MeO})_8\text{Pc}]_3^{2+}$ .

|   |                   |                   |                  |   |                   |                   |                   |
|---|-------------------|-------------------|------------------|---|-------------------|-------------------|-------------------|
| C | -4.19274024229602 | -0.70657411062013 | 3.13806419680171 | C | 3.63240923672143  | -7.48437921043074 | 0.00022444778242  |
| C | -4.19274287070403 | 0.70649473709438  | 3.13805139918995 | C | 7.48438122189407  | -3.63233620986199 | 0.00049538874316  |
| C | -2.79507408698898 | 1.12406804478132  | 3.00123418444191 | C | 7.48435117199174  | 3.63239608321150  | 0.00038722697516  |
| C | -2.79507573635538 | -1.12414902607098 | 3.00121835740026 | C | 3.63228501979353  | 7.48436479138904  | 0.00014967362021  |
| C | 2.79498077092632  | 1.12406988122476  | 3.00138604433403 | C | -3.63232816209876 | 7.48435304338599  | 0.00012829619324  |
| C | 4.19265631438316  | 0.70650243598528  | 3.13814840672725 | C | -7.48435958316075 | 3.63235211277451  | 0.00014828481188  |
| C | 4.19263694725876  | -0.70656675947102 | 3.13836031904524 | C | -7.48438981668860 | -3.63229708549058 | 0.00005369938181  |
| C | 2.79499733584489  | -1.12414846499743 | 3.00128865999684 | C | -3.63245273868230 | -7.48437007914549 | 0.00008004335528  |
| C | -1.12415197478304 | -2.79507575963017 | 3.00127837392850 | C | -4.19263562726188 | -0.70652114283682 | -3.13828397389862 |
| C | 1.12406659001916  | -2.79506893607814 | 3.00133802063215 | C | -4.19263115200758 | 0.70654575720126  | -3.13825116689370 |
| C | 0.70649249600011  | -4.19272679415250 | 3.13823615122337 | C | -2.79497367823312 | 1.12411242151133  | -3.00133229442663 |
| C | -0.70657655239672 | -4.19273314154061 | 3.13819542336791 | C | -2.79498117613352 | -1.12410125814329 | -3.00136657132457 |
| C | -0.70657885072998 | 4.19267299411440  | 3.13799116878182 | C | 2.79506526487836  | 1.12411193533455  | -3.00132162743005 |
| C | 0.70648997516678  | 4.19267480683669  | 3.13799542842343 | C | 4.19274158091515  | 0.70655586834306  | -3.13807803704071 |
| C | 1.12406616961122  | 2.79500250984681  | 3.00123321248007 | C | 4.19273462061178  | -0.70651285182520 | -3.13831678296514 |
| C | -1.12414909866374 | 2.79499861799052  | 3.00121762151040 | C | 2.79509517902803  | -1.12410258022099 | -3.00126082461210 |
| C | -1.43770247845786 | -5.38270142876205 | 3.25832813988052 | C | -1.12405540232819 | -2.79502132230800 | -3.00142011223734 |
| C | -0.72292966004488 | -6.59028586362596 | 3.35560543927989 | C | 1.12416119513660  | -2.79501392176222 | -3.00141865787570 |
| C | 0.72286214731150  | -6.59027527777935 | 3.35567411501530 | C | 0.70659208282623  | -4.19266820348901 | -3.13837680590149 |
| C | 1.43762552677207  | -5.38268378555932 | 3.25843249032319 | C | -0.70647594752064 | -4.19266203949079 | -3.13848482459468 |
| C | -5.38270454291978 | 1.43761905915076  | 3.25825024810406 | C | -0.70648103334124 | 4.19270621566492  | -3.13809540423690 |
| C | -6.59029145854066 | 0.72284623845179  | 3.35549713532291 | C | 0.70658658510135  | 4.19270761813691  | -3.13805115017705 |
| C | -6.59028900486251 | -0.72294238849470 | 3.35549061948610 | C | 1.12415531577314  | 2.79504348201195  | -3.00120939092002 |
| C | -5.38269706965219 | -1.43770720053772 | 3.25824790911168 | C | -1.12405458152307 | 2.79504131965980  | -3.00125705762742 |
| C | 5.38261122306073  | -1.43770141007225 | 3.25834661525978 | C | -1.43760334197940 | -5.38263295578742 | -3.25858764842273 |
| C | 6.59018408522946  | -0.72293387234681 | 3.35578408924918 | C | -0.72283015490151 | -6.59021389069069 | -3.35591197926893 |
| C | 6.59016169656199  | 0.72285333690236  | 3.35603645457980 | C | 0.72296183822206  | -6.59018511032569 | -3.35616707974577 |
| C | 5.38258981793095  | 1.43762475979313  | 3.25861760190276 | C | 1.43772539141777  | -5.38260341629848 | -3.25878869905869 |
| C | 1.43761622806056  | 5.38264125734890  | 3.25810412390303 | C | -5.38257644213456 | 1.43768486648542  | -3.25850535992483 |
| C | 0.72284693718776  | 6.59023934564991  | 3.35523163958246 | C | -6.59016610239707 | 0.72292540256597  | -3.35582299497174 |
| C | -0.72293792545687 | 6.59023841902746  | 3.35522937307370 | C | -6.59017478890737 | -0.72286395171251 | -3.35582775241983 |
| C | -1.43770646434545 | 5.38263975714689  | 3.25809403858497 | C | -5.38259294623759 | -1.43764126218300 | -3.25854454661528 |
| C | -2.67773845431128 | -7.87101550309571 | 3.81622018506410 | C | 5.38272550892764  | -1.43762809515114 | -3.25827751464561 |
| C | 2.67765646315123  | -7.87100323956005 | 3.81635861433314 | C | 6.59028772158706  | -0.72283826180713 | -3.35571565395580 |
| C | 7.87097145515375  | -2.67782443036581 | 3.81590964566894 | C | 6.59024517223282  | 0.72294984975267  | -3.35596879531360 |
| C | 7.87089459460610  | 2.67762497184631  | 3.81682615223095 | C | 5.38266209821274  | 1.43770201592489  | -3.25853221433485 |
| C | 2.67762842316803  | 7.87104449980026  | 3.81578465593672 | C | 1.43772106967844  | 5.38266538991651  | -3.25821126926622 |
| C | -2.67771774670178 | 7.87103792603682  | 3.81580360755464 | C | 0.72295494910356  | 6.59025704832373  | -3.35546096641580 |
| C | -7.87107771656692 | 2.67763675302121  | 3.81604743723278 | C | -0.72283220471165 | 6.59025672653812  | -3.35551508872493 |
| C | -7.87106713465648 | -2.67775279583006 | 3.81595784446096 | C | -1.43760673745769 | 5.38266678016408  | -3.25829144005988 |
| C | -2.45060726531514 | -3.44849021362741 | 0.00007303573221 | C | -2.67763522115134 | -7.8708546096792  | -3.25878713814039 |
| C | -3.44847470768534 | -2.45060527147652 | 0.00008543339295 | C | 2.67778817732898  | -7.87095760944438 | -3.81659894856492 |
| C | -2.75938873946371 | -1.16976741185679 | 0.00003833608278 | C | 7.87110291188173  | -2.67769772583380 | -3.81584869168682 |
| C | -1.16975742793775 | -2.75941654359696 | 0.00003661488258 | C | 7.87095009564237  | 2.67775189607151  | -3.81666174604675 |
| C | 1.16975737057183  | 2.75936967421480  | 0.00011937581897 | C | 2.67773920803285  | 7.87100752215480  | -3.81611668779336 |
| C | 2.45059547891929  | 3.44845554819731  | 0.00019603374368 | C | -2.67759304780361 | 7.87103351602536  | -3.81620013867687 |
| C | 3.44847917340064  | 2.45058706397228  | 0.00021794999053 | C | -7.87092620748268 | 2.67776303664640  | -3.81624943354117 |
| C | 2.75940357017674  | 1.16973904990739  | 0.00014470992663 | C | -7.87094003021078 | -2.67766046803824 | -3.81641444425127 |
| C | 1.16975577375535  | -2.75941334030678 | 0.00009443055260 | H | -2.53447805727431 | -5.35108441396239 | 3.27549793856161  |
| C | 2.75939477291391  | -1.16977063457454 | 0.00013825520059 | H | 2.53439856322365  | -5.35104801081005 | 3.27571136469208  |
| C | 3.44847702458261  | -2.45061057796561 | 0.00027014217457 | H | -5.35106757178347 | 2.53439076556942  | 3.27567745308791  |
| C | 2.45060451482687  | -3.44849014418717 | 0.00018212269465 | H | -5.35104874670090 | -2.53447824349841 | 3.27567657284983  |
| C | -3.44846726203004 | 2.45058359793629  | 0.00012340822913 | H | 5.35093461671472  | -2.53446762450266 | 3.27604729672195  |
| C | -2.45058840601216 | 3.44845703067053  | 0.00011562464490 | H | 5.35088163542651  | 2.53438206710617  | 3.27682527084616  |
| C | -1.16974863930705 | 2.75937340509114  | 0.00007974522265 | H | 2.53438756451692  | 5.35099966364352  | 3.27553130121957  |
| C | -2.75939001990152 | 1.16973871597708  | 0.00005979517984 | H | -2.53447796689344 | 5.35099774898871  | 3.27553130559484  |
| C | 2.77316695581811  | -4.81084916789918 | 0.00033770185878 | H | -2.88581466563194 | -7.31486283686439 | 4.75579200913657  |
| C | 4.13477183779588  | -5.15978409882735 | 0.00044293658920 | H | -3.32296966769204 | -7.46179943780097 | 3.00801164400405  |
| C | 5.15979510938544  | -4.13474853440634 | 0.00032386620580 | H | -2.91447619064432 | -8.94052329554030 | 3.95917518853582  |
| C | 4.81083967506893  | -2.77315116809677 | 0.00026935025138 | H | 2.88565108707433  | -7.31484882310444 | 4.75597469768976  |
| C | -4.81084062290727 | -2.77313167323954 | 0.00009466231265 | H | 3.32294426326425  | -7.46173834585351 | 3.00822090989426  |
| C | -5.15980838118974 | -4.13472627268160 | 0.00008937183436 | H | 2.91439726500318  | -8.94051513170448 | 3.95927792436515  |
| C | -4.13479235334584 | -5.15976838083886 | 0.00006763252381 | H | 8.94051029707127  | -2.91459963500525 | 3.95857310083539  |
| C | -2.77318428234009 | -4.81084561305488 | 0.00007308420315 | H | 7.46159342879543  | -3.32298195439150 | 3.00772490206474  |
| C | 4.81083652132408  | 2.77315970903324  | 0.00025777307351 | H | 7.31498443479414  | 2.885982799718296 | 4.7555949049007   |
| C | 5.15976215512392  | 4.13476749271856  | 0.00025285763609 | H | 8.94041271480085  | 2.91434144364930  | 3.95974704271525  |
| C | 4.13472142382990  | 5.15978515389354  | 0.00022581763678 | H | 7.46167031646650  | 3.32305357702340  | 3.00877727798072  |
| C | 2.77312612221450  | 4.81082016617808  | 0.00020493262061 | H | 7.31474329364418  | 2.88548185955234  | 4.75644519239384  |
| C | -2.77313691305956 | 4.81081838720708  | 0.00012016090743 | H | 2.91436648861118  | 8.94059322965764  | 3.95843745110742  |
| C | -4.13473732171347 | 5.15976739823375  | 0.00011214308932 | H | 3.32304808227323  | 7.46160012648318  | 3.00784077503730  |
| C | -5.15976954140033 | 4.13474112286103  | 0.00013609216726 | H | 2.88547175983954  | 7.31513172194995  | 4.75554754540825  |
| C | -4.81082740932718 | 2.77313820237918  | 0.00014296453088 | H | -2.91445380187578 | 8.94058468145779  | 3.95847544497701  |

|   |                   |                   |                   |   |                   |                   |                   |
|---|-------------------|-------------------|-------------------|---|-------------------|-------------------|-------------------|
| H | -3.32314244551387 | 7.46160854504101  | 3.00785577209405  | H | 2.88561859304797  | 7.31483375464384  | -4.75571375167410 |
| H | -2.88555699978334 | 7.31511014758825  | 4.75555852958778  | H | 3.32313240228701  | 7.46186661640271  | -3.00799837713878 |
| H | -7.31498914421563 | 2.88560764155410  | 4.75568015817869  | H | -2.91430495384585 | 8.94054842517254  | -3.95916061480824 |
| H | -7.46182188132457 | 3.32296847400792  | 3.00793988059691  | H | -2.88544485107748 | 7.31488614047885  | -4.75581920554508 |
| H | -8.94059887528695 | 2.91434500062112  | 3.95895599363812  | H | -3.32301799197494 | 7.46187696093631  | -3.00811515335999 |
| H | -7.31502311742867 | -2.88576587914566 | 4.75560887585287  | H | -7.46160212193363 | 3.32301161347232  | -3.00811224967779 |
| H | -7.46175690754027 | -3.32303963112207 | 3.00783947181834  | H | -7.31488469055773 | 2.88579408480918  | -4.75589689430262 |
| H | -8.94059138206646 | -2.91448975137571 | 3.95880126104788  | H | -8.94044826567236 | 2.91451194150534  | -3.95907982203571 |
| H | 1.97473541490790  | -5.56215890125267 | 0.00052625178803  | H | -7.46168720500803 | -3.32297234268049 | -3.00829058847238 |
| H | 5.56213895843994  | -1.97470956534264 | 0.00003504967328  | H | -7.31483644500121 | -2.88563864052900 | -4.75603671994987 |
| H | -5.56212994552250 | -1.97468084188915 | 0.00012116032902  | H | -8.94045668616272 | -2.91437975847819 | -3.95933560554346 |
| H | -1.97476353155911 | -5.56216712105586 | 0.00004838375292  | N | -1.99654292584872 | -0.00004114282213 | 2.87250365621322  |
| H | 5.56215674173343  | 1.97473703905146  | 0.00027944624422  | N | 1.99646375373103  | -0.00004232883955 | 2.87257782295736  |
| H | 1.97467828375016  | 5.56211226084160  | 0.00017183211045  | N | -0.00004334096163 | -1.99654957758419 | 2.87252739290041  |
| H | -1.97470158604172 | 5.56212435026660  | 0.00010554091598  | N | -0.00003803211583 | 1.99646387309345  | 2.87254096115331  |
| H | -5.56213474268658 | 1.97470416323262  | 0.00018927141894  | N | -2.39935807297652 | -2.39935409077452 | 3.03309374998353  |
| H | 2.98263353564111  | -7.44687672091211 | 0.90069951707894  | N | -2.39935563185658 | 2.39927628213862  | 3.03304877626443  |
| H | 2.98278114210074  | -7.44677768653634 | -0.90035421053791 | N | -2.39926726505911 | 2.39928001132534  | 3.03313758801274  |
| H | 4.20795617750242  | -8.42685434121222 | 0.00021813397996  | N | 2.39927156251082  | -2.39934815478502 | 3.03320043444352  |
| H | 7.44667002008174  | -2.98248597872795 | 0.90090297523781  | N | -1.37492895312808 | -1.37495151710319 | 0.00003359555139  |
| H | 7.44696613703195  | -2.98278246173807 | -0.90014288970233 | N | 1.37493959411636  | 1.37490967650788  | 0.00011434999550  |
| H | 8.42686744102263  | -4.20786461804312 | 0.00074087006912  | N | 1.37493184846510  | -1.37494997286988 | 0.00008498542187  |
| H | 8.42682999670017  | 4.20793812986203  | 0.00049953261485  | N | -1.37492751794424 | 1.37491068621513  | 0.00006914091912  |
| H | 7.44691734366025  | 2.98269759578275  | -0.90014687604829 | N | -0.00000034998577 | -3.39499480166046 | 0.00008633775781  |
| H | 7.44668363468014  | 2.98270569739568  | 0.90091498385455  | N | -3.39497180132886 | -0.00001432131003 | 0.00007192134841  |
| H | 4.20780513658047  | 8.42685689162891  | 0.00017119838986  | N | 0.00000513671705  | 3.39495168624526  | 0.00012323049337  |
| H | 2.98261663149264  | 7.44680702286812  | -0.90039782333422 | N | 3.39497927796393  | -0.00001833893592 | 0.00019117363874  |
| H | 2.98256401481076  | 7.44679059787643  | 0.90065685041717  | N | -1.99645624352789 | 0.00000102902398  | -2.87254079842668 |
| H | -4.20785915893508 | 8.42683857373982  | 0.00016749627122  | N | 1.99655678415191  | -0.00000440378238 | -2.87248995777867 |
| H | -2.98263782172580 | 7.44683272554057  | -0.90040552309537 | N | 0.00004893590652  | -1.99650789518020 | -2.87254167093737 |
| H | -2.98262721421555 | 7.44675734513200  | 0.90064956759342  | N | 0.00004987221195  | 1.99651193247582  | -2.87247773522094 |
| H | -8.42684026473463 | -4.20789122452744 | 0.00011379897871  | N | -2.39925816000848 | -2.39930023399070 | -3.0330336414471  |
| H | -7.44681429164469 | 2.98259390817174  | -0.90033455763555 | N | -2.39925613956399 | 2.39931787556424  | -3.03315463027928 |
| H | -7.44679900984965 | 2.98271785752088  | 0.90072102043121  | N | 2.39935274886652  | 2.39931964686486  | -3.03310455816095 |
| H | -7.44682096614228 | -2.98260625884144 | 0.90058525149408  | N | 2.39936700675512  | -2.39929740756585 | -3.03324478946961 |
| H | -7.44681976826908 | -2.98258559644223 | -0.90046317936652 | O | -1.29566603904968 | -7.81035326871900 | 3.47910603118366  |
| H | -8.42687966732984 | -4.20781955713288 | 0.00004705521852  | O | 1.29560767374605  | -7.81034296411791 | 3.47914289676050  |
| H | -2.98273570098541 | -7.44680567727340 | 0.90059479224991  | O | 7.81027376704673  | -1.29570282673610 | 3.47898436806105  |
| H | -2.98276430638378 | -7.44684655192603 | -0.90045790733003 | O | 7.81023640860383  | 1.29561758559471  | 3.47943159473999  |
| H | -4.20801034860629 | -8.42683879377448 | 0.00010964009656  | O | 1.29561661606455  | 7.81033471107767  | 3.47840592756687  |
| H | -2.53438497500011 | -5.35104290898657 | -3.27542735337691 | O | -1.29570872963540 | 7.81033197717938  | 3.47841521440049  |
| H | 2.53449270594020  | -5.35093488463292 | -3.27639143653861 | O | -7.81037828361530 | 1.29559817382851  | 3.47878484339333  |
| H | -5.35091877150160 | 2.53445517397528  | -3.27594791782455 | O | -7.81037308506092 | -1.29570071357226 | 3.47876782413042  |
| H | -5.35095664117783 | -2.53441263338618 | -3.27597783195385 | O | 4.59212245729767  | -6.43102278200245 | 0.00035906551446  |
| H | 5.35108505115846  | -2.53439581518290 | -3.27596829579226 | O | 6.43104123722074  | -4.59207381903697 | 0.00047190246769  |
| H | 5.35094117944848  | 2.53445885610091  | -3.27674051719096 | O | 6.43100068296763  | 4.59211767150716  | 0.00025994688609  |
| H | 2.53449387876867  | 5.35103534830790  | -3.27556073956884 | O | 4.59203590037283  | 6.43103515993815  | 0.00017732745645  |
| H | -2.53437799007096 | 5.35103584654537  | -3.27575638214785 | O | -4.59206526438838 | 6.43101294669230  | 0.00009900163649  |
| H | -3.32287154559770 | -7.46179942140802 | -3.00850036675506 | O | -6.43101173482908 | 4.59207940704565  | 0.00009098818928  |
| H | -2.88570370908495 | -7.31451699882834 | -4.75625060357484 | O | -6.43105807593207 | -4.59204274202094 | 0.00004686005474  |
| H | -2.91437042318369 | -8.94033419533081 | -3.95995619779273 | O | -4.59215356239365 | -6.43100301098325 | 0.00007095254797  |
| H | 3.32300401819619  | -7.46169939496548 | -3.00839955502959 | O | -1.2956581778915  | -7.81025802567202 | -3.47964604379793 |
| H | 2.88588822207740  | -7.31486324813056 | -4.75620037238041 | O | 1.29570818030117  | -7.81026329587548 | -3.47952139751910 |
| H | 2.91451907422099  | -8.94047633294330 | -3.95948309523872 | O | 7.81038783137311  | -1.29558490867109 | -3.4788808541237  |
| H | 8.94061678549610  | -2.91442029628296 | -3.95879929713771 | O | 7.81031488282590  | 1.29573294724898  | -3.47929821710476 |
| H | 7.31490161421193  | -2.88588994964701 | -4.75536068316168 | O | 1.29572405825148  | 7.81033941053327  | -3.47873441415200 |
| H | 7.46202234948665  | -3.32286480965406 | -3.00751880948947 | O | -1.29559130975576 | 7.81034547931093  | -3.47877095043166 |
| H | 8.94044469612594  | 2.91447738508184  | -3.95975243943691 | O | -7.81024637680391 | 1.29569277976849  | -3.47910628261064 |
| H | 7.31467042783383  | 2.88564972762419  | -4.75619260223066 | O | -7.81025755716835 | -1.29561451192284 | -3.47917288179743 |
| H | 7.46190140299345  | 3.32313129101218  | -3.00848506919485 | Y | -0.00002256067097 | -0.00003246314088 | 1.68285369501251  |
| H | 2.91446433153764  | 8.94051678082056  | -3.95909738850620 | Y | 0.00003113520926  | -0.0000882073099  | -1.68281519035637 |



Table S10. BP86/def2-SVP geometry of  $g\text{-Y}_2(\text{MeO})_8\text{Pc}_3$ .

|   |                   |                   |                   |   |                    |                   |                    |
|---|-------------------|-------------------|-------------------|---|--------------------|-------------------|--------------------|
| C | -3.60744293632975 | -2.26305974432049 | 3.17522424730590  | C | 7.49461741589391   | -3.67287685631480 | 0.11554363639980   |
| C | -4.14990830812512 | -0.95740959749504 | 3.14338827681462  | C | 7.49384375624533   | 3.67493585251528  | -0.09257610954966  |
| C | -3.01818504355876 | -0.03220598406284 | 3.07607116097097  | C | 3.67291646288044   | 7.49469248352171  | 0.10302512515491   |
| C | -2.15253995025151 | -2.10911124327839 | 3.09352491008598  | C | -3.67476632923649  | 7.49361255031147  | -0.11242088843417  |
| C | 2.14154492240307  | 2.11348709534417  | 3.09794921702676  | C | -7.494656674529235 | 3.67307372875101  | 0.08769380725521   |
| C | 3.59617106221398  | 2.26755516720427  | 3.18401954182850  | C | -7.49342157115818  | -3.67523969648729 | -0.11136311457017  |
| C | 4.13873271462155  | 0.96185014471998  | 3.15603648848911  | C | -3.67304048374969  | -7.49460277646098 | 0.10146569030777   |
| C | 3.00724056978851  | 0.03653260958700  | 3.08655697312491  | C | -4.13910346893754  | 0.95608967632968  | -3.15707467021656  |
| C | 0.02887172851346  | -3.01053251016558 | 3.08366701128986  | C | -3.59693576177179  | 2.26191084463877  | -3.18703397241790  |
| C | 2.10578643791450  | -2.14486353208050 | 3.10110311703609  | C | -2.14225493090760  | 2.10840045591249  | -3.10092091761669  |
| C | 2.25963455792550  | -3.59957280876591 | 3.18620806840788  | C | -3.00731800254501  | 0.03121341669822  | -3.08645516340287  |
| C | 0.95400604850681  | -4.14209875981719 | 3.15437044392255  | C | 3.01813572568409   | -0.03562175392827 | -3.07635224062813  |
| C | -2.27095739765722 | 3.60402046288679  | 3.17328262917137  | C | 4.15012250661053   | -0.96057982712876 | -3.14261210474892  |
| C | -0.96523731153763 | 4.14653591724510  | 3.14521821651439  | C | 3.60804707893948   | -2.26644103365116 | -3.17258269434634  |
| C | -0.03984356253984 | 3.01489844362552  | 3.07907521880551  | C | 2.15311284486136   | -2.11282429480181 | -3.09080224553395  |
| C | -2.11678893581042 | 2.14920707552992  | 3.09044670431600  | C | -2.10519482801848  | -2.14990385717862 | -3.09790644287605  |
| C | 0.74213289633329  | -5.52854862604682 | 3.10698983504624  | C | -0.02802728375368  | -3.01491274839466 | -3.07942370057915  |
| C | 1.86730806534280  | -6.36393889256641 | 3.08305594459555  | C | -0.95282237303405  | -4.14686045089159 | -3.14859934012414  |
| C | 3.19841878409343  | -5.81476104628385 | 3.15181058160138  | C | -2.25861338060475  | -3.60477011947202 | -3.18107624405634  |
| C | 3.39409089445561  | -4.42682500224453 | 3.20944580387428  | C | 0.96386583180856   | 4.14238116933698  | -3.15082245626142  |
| C | -5.53625543669878 | -0.74550711314272 | 3.09310417815998  | C | 2.26976946579743   | 3.60026191082457  | -3.17807649873109  |
| C | -6.37158890738731 | -1.87066246716420 | 3.06646757439634  | C | 2.11606792227124   | 2.14549898454678  | -3.09357792926176  |
| C | -5.82256666794515 | -3.20182353231916 | 3.13546849211593  | C | 0.03884076010644   | 3.01052924986001  | -3.08333344641057  |
| C | -4.43475124489619 | -3.39753145625342 | 3.19588072896320  | C | -3.39280871277046  | -4.43240886169890 | -3.20337670369298  |
| C | 5.52523589464981  | 0.74989794646812  | 3.11034384405636  | C | -3.19671836465943  | -5.82021141011388 | -3.14394052909208  |
| C | 6.36061083474182  | 1.87504311778277  | 3.08451650489268  | C | -1.86544640154888  | -6.36889439803731 | -3.07437276320157  |
| C | 5.81135917708264  | 3.20630580800593  | 3.14975579624437  | C | -0.74052892713958  | -5.53318034906792 | -3.09930426661993  |
| C | 4.42336760315142  | 3.40208465783614  | 3.20551593947496  | C | -4.42448311198648  | 3.39615625835345  | -3.21000117391587  |
| C | -0.75325326122402 | 5.53294813479575  | 3.09689854968853  | C | -5.81240587594311  | 3.20003878815835  | -3.15360970909329  |
| C | -1.87837621991934 | 6.36826520311046  | 3.06846138193063  | C | -6.36124938782039  | 1.86870679186163  | -3.08640811533488  |
| C | -3.20968776230267 | 5.81914478104406  | 3.13378049667483  | C | -5.52552951642678  | 0.74378113264917  | -3.11083490258889  |
| C | -3.40550303796993 | 4.43126701834683  | 3.19220897839422  | C | 4.43570128203793   | -3.40068308421040 | -3.19189962497560  |
| C | 0.53689771697418  | -8.32467217999285 | 2.88151638519370  | C | 5.82346869142437   | -3.20446789049264 | -3.13209086544572  |
| C | 5.53833849602270  | -6.28116185684185 | 3.15497265678446  | C | 6.37209668668274   | -1.87305025785841 | -3.06495140750945  |
| C | 8.32161647399069  | 0.54427528020331  | 2.88788697559906  | C | 5.53641670900755   | -0.74818557821651 | -3.09290142043595  |
| C | 6.27787793186631  | 5.54622596072381  | 3.14945836829984  | C | 3.40404192316341   | 4.42786211828102  | -3.19767409819095  |
| C | -0.54745553999548 | 8.32893383767962  | 2.86952658137185  | C | 3.20774967447346   | 5.81573885200555  | -3.14081497032953  |
| C | -5.54960619849302 | 6.28563859980108  | 3.13057295528530  | C | 1.87624591086596   | 6.36449693625506  | -3.07640590620951  |
| C | -8.33195635784360 | -0.54008870712446 | 2.86244663800473  | C | 0.75140619196879   | 5.52877311010330  | -3.10410191167949  |
| C | -6.28900378682993 | -5.54174007081431 | 3.13633279115898  | C | -5.53649198840585  | -6.28738534135869 | -3.14820164827258  |
| C | -2.44867111211622 | -3.44851459306094 | 0.01629296362171  | C | -0.53443423875275  | -8.32891407665959 | -2.86993479050231  |
| C | -3.44772581978986 | -2.44971503014241 | -0.02266590315401 | C | 6.29058341073983   | -5.54424107974218 | -3.12942472359742  |
| C | -2.75787989851278 | -1.16989533169470 | -0.01536478404105 | C | 8.33209034954302   | -0.54164357593708 | -2.86273383069361  |
| C | -1.16904796143839 | -2.75830226748058 | 0.01095207956397  | C | 5.54751168557326   | 6.28301528433659  | -3.13771747309976  |
| C | 1.16913293926075  | 2.75823061545832  | 0.01147941365688  | C | 0.54464065882569   | 8.32488727785566  | -2.87931788688089  |
| C | 2.44873118619887  | 3.44845023553731  | 0.02022575264638  | C | -6.27962778871523  | 5.53982521001267  | -3.15713407610283  |
| C | 3.44789962847890  | 2.44958721914474  | -0.01407883290031 | C | -8.32176429575795  | -0.54164357593708 | -2.887538114141668 |
| C | 2.75802642433498  | 1.16978627692418  | -0.00725557792083 | H | -0.28334216772287  | -5.91509909606704 | 3.05303667073715   |
| C | 1.16992036368073  | -2.75800951291190 | -0.00726162836484 | H | 4.39583232397732   | -3.97944362021908 | 3.21512591259471   |
| C | 2.75829551725042  | -1.16912211652483 | 0.01694730670584  | H | -5.92267480150377  | 0.28000301396903  | 3.03883780041707   |
| C | 3.44851586396851  | -2.44871721227585 | 0.02591490315899  | H | -3.98741523128499  | -4.39928826303825 | 3.20202056229132   |
| C | 2.44975630282510  | -3.44785615160702 | -0.01192078539075 | H | 5.91185688882302   | -0.27568489370277 | 3.05901371180659   |
| C | -3.44843726511626 | 2.44869389432838  | 0.01066144301337  | H | 3.97596545790279   | 4.40382797286962  | 3.20864299295893   |
| C | -2.44953040400994 | 3.44777582544347  | -0.02491525523152 | H | 0.27237077918704   | 5.91945745167790  | 3.04551097333111   |
| C | -1.16975368554970 | 2.75790059899588  | -0.01536363868106 | H | -4.40726037702670  | 3.98390324161970  | 3.19549383372619   |
| C | -2.75823598270947 | 1.16905805449925  | 0.005492616686836 | H | -0.06681891447888  | -8.12605477619758 | 3.79502057542117   |
| C | 2.77804808718953  | -4.81117551126281 | -0.05176290624969 | H | -0.03469854655043  | -7.96302738655577 | 1.99619525846438   |
| C | 4.13541241970153  | -5.15278128664795 | -0.03005992911561 | H | 0.70543939223670   | -9.41351279139977 | 2.78730068196641   |
| C | 5.15395899373187  | -4.13375472524477 | 0.05043395418432  | H | 5.72606422085218   | -5.65458559814133 | 4.05480924215948   |
| C | 4.81187125769827  | -2.77646315110456 | 0.06896825380401  | H | 5.80688293202785   | -5.71366056927270 | 2.23918972616640   |
| C | -4.81097269328090 | -2.7779378283695  | -0.06557173168765 | H | 6.16862682424170   | -7.18803832848772 | 3.20784525482475   |
| C | -5.15263761611994 | -4.13531757403145 | -0.04553344359856 | H | 9.41053200656278   | 0.71268854537870  | 2.79429275496924   |
| C | -4.13379228517846 | -5.15393011775067 | 0.03641650248736  | H | 7.96087423852508   | -0.02938849316232 | 2.00352604942528   |
| C | -2.77653861339178 | -4.81188679925260 | 0.05784816708503  | H | 8.12221853205799   | -0.05740581482948 | 3.80256868747044   |
| C | 4.81126311095130  | 2.7776002624628   | -0.05320938410277 | H | 7.18474591999290   | 6.17654233775681  | 3.20214167781743   |
| C | 5.15288868036826  | 4.13515794108227  | -0.03419683185110 | H | 5.71131227326550   | 5.81323883073856  | 2.23265566185729   |
| C | 4.13380171061048  | 5.15389860212830  | 0.04302125949444  | H | 5.65042994409507   | 5.73555406722501  | 4.04835365798377   |
| C | 2.77648190626600  | 4.81187938420127  | 0.06071756157200  | H | -0.71579430471592  | 9.41768284612888  | 2.77388236370583   |
| C | -2.77761682830755 | 4.81107376379857  | -0.06706016199972 | H | 0.02703513940909   | 7.96666788994875  | 1.98632734681655   |
| C | -4.13502346068486 | 5.15276629397367  | -0.04972793322620 | H | 0.05336679008954   | 8.13112726570668  | 3.78511634131066   |
| C | -5.15384047467352 | 4.13386092299526  | 0.0284382408298   | H | -6.17999427061049  | 7.199276170427658 | 3.18039653560232   |
| C | -4.81188177729022 | 2.77657386407475  | 0.04948522397986  | H | -5.81561934822430  | 5.71686266447459  | 2.21484850690450   |
| C | 3.67533951680076  | -7.49367676499395 | -0.09146734385287 | H | -5.73991235471519  | 5.66035619298163  | 4.03077753937836   |

|   |                   |                   |                   |   |                   |                   |                   |
|---|-------------------|-------------------|-------------------|---|-------------------|-------------------|-------------------|
| H | -8.13500570182055 | 0.06279491410782  | 3.77686034064516  | H | 0.71260877609012  | 9.41377199361056  | -2.78455933574289 |
| H | -7.96870453889316 | 0.03230930255802  | 1.97830319983006  | H | -0.05608955972628 | 8.12614840847220  | -3.79476798469296 |
| H | -9.42062148136164 | -0.70855435018333 | 2.76609069657613  | H | -0.02975230883977 | 7.96315591874607  | -1.99583536977686 |
| H | -5.66464741750356 | -5.73021195952950 | 4.03756198804963  | H | -5.71299379012755 | 5.80858700206370  | -2.24088431850997 |
| H | -5.71925903285952 | -5.80955383533971 | 2.22173415739636  | H | -5.65238050322933 | 5.72779845058961  | -4.05645168697486 |
| H | -7.19601071509533 | -6.17206256534087 | 3.18647606740286  | H | -7.18669360815801 | 6.16977744283735  | -3.21075236528130 |
| H | 1.98121506667491  | -5.56369102642844 | -0.07751158670036 | H | -7.96058222675113 | -0.03469670385357 | -2.00245636563374 |
| H | 5.56406300653881  | -1.97931162383529 | 0.09451629683277  | H | -8.12237540151979 | -0.06533133284949 | -3.80141801217830 |
| H | -5.56340001139285 | -1.98105287683325 | -0.09250546897141 | H | -9.41071604332954 | 0.70573561112321  | -2.79393072304176 |
| H | -1.97946885497504 | -5.56411448323696 | 0.08474515453863  | N | -1.84626967897210 | -0.76277704543803 | 2.98014841028192  |
| H | 5.56379029302699  | 1.98086841524106  | -0.07672906803552 | N | 1.83564831077388  | 0.76696918638837  | 2.98577223986336  |
| H | 1.97935138044708  | 5.56416089578380  | 0.08409350512847  | N | 0.75955116800564  | -1.83885583276342 | 2.98579645856941  |
| H | -1.98066206855183 | 5.56351301910307  | -0.09146147590929 | N | -0.77017249860352 | 1.84306821626102  | 2.98015532408101  |
| H | -5.56420968986680 | 1.97952575189502  | 0.07404788806234  | N | -1.29982624230252 | -3.13648090877586 | 3.11610890158052  |
| H | 3.10052898973764  | -7.53622843347810 | 0.85696766542484  | N | -3.14420497170030 | 1.29645365838590  | 3.10959072380298  |
| H | 2.97734522570919  | -7.41123023055588 | -0.95449354165632 | N | 1.28873923803107  | 3.14088479546550  | 3.11601871161556  |
| H | 4.26868523033789  | -8.42091129463879 | -0.19210783567509 | N | 3.13314116511004  | -1.29209058466777 | 3.12251497349021  |
| H | 7.41032464544508  | -2.97494577955644 | 0.97722714072827  | N | -1.37612150304746 | -1.37658591589130 | -0.00167777537918 |
| H | 7.53883132379302  | -3.09965342644585 | -0.83376684476648 | N | 1.37623306054012  | 1.37650301631235  | 0.00157127570756  |
| H | 8.42182952296085  | -4.26578131584704 | 0.21894464515807  | N | 1.37659383303459  | -1.37622255686743 | 0.00367041765456  |
| H | 8.42115711371711  | 4.26805322122980  | -0.19383117800486 | N | -1.37649449735655 | 1.37613377494201  | -0.00376415080646 |
| H | 7.41211073002263  | -5.56416089578380 | -0.95405185159738 | N | 0.00052028116305  | -3.39208601835545 | 0.00223326034614  |
| H | 7.53561632136012  | 3.10233424885658  | 0.85722354784710  | N | -3.39198645556181 | -0.00050862589236 | -0.00601110818283 |
| H | 4.26571907235808  | 8.42207674476752  | 0.20546328565503  | N | -0.00039525048966 | 3.39198835873487  | -0.00234728268343 |
| H | 3.10097452204614  | 7.53711445056703  | -0.84713998888557 | N | 3.39208492255350  | 0.00041480348221  | 0.00592617121664  |
| H | 2.97234616746833  | 7.41205729267567  | 0.96393997255643  | N | -1.83593188310115 | 0.76213017331524  | -2.98687870068702 |
| H | -4.26782314571570 | 8.42072641008314  | -0.21582566820038 | N | 1.84646277912281  | -0.76643050871506 | -2.97920547018085 |
| H | -2.97425218705345 | 7.41021712790616  | -0.97330936709745 | N | -0.75904848194276 | -1.84331980531801 | -2.98309748682709 |
| H | -3.10272734728001 | 7.53723911835675  | 0.83762933626990  | N | 0.76954753235097  | 1.83906883437614  | -2.98294806381795 |
| H | -8.42214504983176 | 4.26605209688941  | 0.18816771271251  | N | -3.13282299452691 | -1.29749266473735 | -3.12044806619362 |
| H | -7.53623096068431 | 3.09926858488988  | -0.86139046869453 | N | -1.28978375081600 | 3.13604685915083  | -3.12042285400800 |
| H | -7.41274070652725 | 2.97419597142308  | 0.95005332973434  | N | 3.14374458275673  | 1.29303451110461  | -3.11168064064064 |
| H | -7.53787979139722 | -3.10096965273856 | 0.83730414429317  | N | 1.30070458109902  | -3.14048979487210 | -3.11184785044562 |
| H | -7.40927101292216 | -2.97674384281532 | -0.97381605919740 | O | 1.81721037645711  | -7.72506061072075 | 2.96029713613910  |
| H | -8.42044495478559 | -4.26853971523689 | -0.21418509518338 | O | 4.19363229760968  | -6.74056231982744 | 3.11450015309149  |
| H | -2.97533417152098 | 7.41064985364090  | 0.96457728059647  | O | 7.72185279741570  | 1.82471206753106  | 2.96318802681290  |
| H | -3.09793172212194 | -7.53841569928952 | -0.84672354153620 | O | 6.73723657801392  | 4.20142097335472  | 3.11177033662910  |
| H | -4.26614052229244 | -8.42186266167479 | 0.20331078404053  | O | -1.82795398246866 | 7.72928087123498  | 2.94466551646137  |
| H | -4.39469365414564 | -3.98536145086784 | -3.20972043762719 | O | -4.20477314731812 | 6.74494542132720  | 3.09322776521534  |
| H | 0.28506561041029  | -5.91932273584945 | -3.04468186528597 | O | -7.73247417590192 | -1.82046779482365 | 2.94115248285123  |
| H | -3.97737376969281 | 4.39802514511538  | -3.21438250819961 | O | -6.74830940404123 | -4.19700137507928 | 3.09580664024516  |
| H | -5.91181277542408 | -0.28184645003072 | -3.05788613201291 | O | 4.61557421973147  | -6.42622257648818 | -0.08110775991330 |
| H | 3.98869262926198  | -4.40259287887218 | -3.19673560484286 | O | 6.42745250337927  | -4.61343143271069 | 0.10475793186591  |
| H | 5.92252710827028  | 0.27752232954464  | -3.04021067841122 | O | 6.42637863628235  | 4.61518813634305  | -0.08527332749105 |
| H | 4.40594771292485  | 3.98082467704309  | -3.20019395803941 | O | 4.61345191345180  | 6.42747910734210  | 0.09550480592111  |
| H | -0.27436254376962 | 5.91498822603178  | -3.05342091032781 | O | -4.61501148989919 | 6.42615821426106  | -0.10363098294218 |
| H | -5.80573857075116 | -5.71876984603301 | -2.23331851196679 | O | -6.42746164148646 | 4.61361872388575  | 0.07923252481047  |
| H | -5.72392906388105 | -5.66205968529441 | -4.04897062190860 | O | -6.42597256797859 | -4.61545437564220 | -0.09943580289391 |
| H | -6.16645456102464 | -7.19453582769340 | -3.20023272410876 | O | -4.61358537225284 | -6.42744305123746 | 0.08923030717245  |
| H | 0.03693173250471  | -7.96581948034450 | -1.98506177434865 | O | -4.19165731079373 | -6.74630524485376 | -3.10637411875685 |
| H | 0.06931750320257  | -8.13138117449194 | -3.78365035044014 | O | -1.81493516191535 | -7.72982747722355 | -2.94970793204591 |
| H | -0.70263240612023 | -9.41767452405288 | -2.77419927625090 | O | 6.74950899993789  | -4.19931037469216 | -3.09105715802978 |
| H | 7.19777156040276  | -6.17437781527505 | -3.17861134563955 | O | 7.73298118049711  | -1.82228923614581 | -2.93984386460190 |
| H | 5.66623752265010  | -5.73432153135183 | -4.03032678580230 | O | 4.20252255238351  | 6.74190960333148  | -3.10102874192581 |
| H | 5.72096985217258  | -5.81077644180463 | -2.21436891502321 | O | 1.82534808360768  | 7.72561517137358  | -2.9532652819392  |
| H | 9.42081109968258  | -0.70968056111761 | -2.76624445895239 | O | -6.73857533817535 | 4.19494426945885  | -3.11707186067489 |
| H | 8.13491157780596  | 0.06009200404237  | -3.77785589283025 | O | -7.72245671805149 | 1.81810802334652  | -2.96480799114129 |
| H | 7.96876233771512  | 0.03171773011103  | -1.97924268845576 | Y | -0.00294594562809 | 0.00119133918453  | 1.74298612141875  |
| H | 6.17759584083969  | 7.19014374229096  | -3.18865356660443 | Y | 0.00300112892160  | -0.00119750019603 | -1.74302466013243 |
| H | 5.73806622382979  | 5.65665481484888  | -4.03711594386867 |   |                   |                   |                   |
| H | 5.81366841633340  | 5.71549583016725  | -2.22125724688767 |   |                   |                   |                   |

Table S11. BP86/def2-SVP geometry of  $g\text{-Y}_2(\text{MeO})_8\text{Pc}]^{\text{+}}$ .

|   |                   |                    |                   |   |                   |                   |                   |
|---|-------------------|--------------------|-------------------|---|-------------------|-------------------|-------------------|
| C | -3.58984201430422 | -2.29044092418638  | 3.16779630366956  | C | 3.68187020385483  | -7.49901048002115 | -0.07115519188720 |
| C | -4.14191007688467 | -0.98971270771584  | 3.14169157825650  | C | 7.50004535035740  | -3.67913016318999 | 0.09685281611885  |
| C | -3.01650147634995 | -0.05653268860412  | 3.06649993107939  | C | 7.49899061944419  | 3.68258822401704  | -0.06956282340251 |
| C | -2.13442484805709 | -2.12443900750367  | 3.08102892596446  | C | 3.67838792405454  | 7.50064104268926  | 0.08429550542102  |
| C | 2.12450628741335  | 2.12858459478776   | 3.08514022808060  | C | -3.68129414057813 | 7.49938491337328  | -0.09000156290161 |
| C | 3.57968209587042  | 2.29467859734414   | 3.17567865123845  | C | -7.50035723804260 | 3.67986870706177  | 0.06456156296899  |
| C | 4.13178529094208  | 0.99389488508706   | 3.15326429966334  | C | -7.49931283279359 | -3.68084834202920 | -0.09101745550322 |
| C | 3.00658617600162  | 0.06065007012898   | 3.07594831531282  | C | -3.68034682734681 | -7.49982617512616 | 0.07744572635791  |
| C | 0.05362835088109  | -3.00951841486533  | 3.07292402012990  | C | -4.13210834117181 | 0.98811313800741  | -3.15489145244199 |
| C | 2.12148746867873  | -2.12739330209202  | 3.08772849990951  | C | -3.58041315054769 | 2.28904289488052  | -3.17914977731451 |
| C | 2.28743399421941  | -3.58264277725080  | 3.17725723263636  | C | -2.12519010836537 | 2.12354489422456  | -3.08827076113146 |
| C | 0.98674228919356  | -4.13477853836050  | 3.15108115323114  | C | -3.00661942705664 | 0.05532204618958  | -3.07629446413431 |
| C | -2.29767368930497 | 3.58689924262498   | 3.16610317465922  | C | 3.01655786730019  | -0.05998554005963 | -3.06620221617225 |
| C | -0.99688579646184 | 4.13900176869297   | 3.14352492778537  | C | 4.14227349300704  | -0.99292839182676 | -3.13972725980729 |
| C | -0.06353127406489 | 3.01367463921999   | 3.06932696063430  | C | 3.59058728697334  | -2.29384656913160 | -3.16412868209369 |
| C | -2.13146770186838 | 2.13156245760032   | 3.07837828690582  | C | 2.13510343192777  | -2.12813110086109 | -3.07796439513581 |
| C | 0.78361940203435  | -5.52227145506372  | 3.12300556791611  | C | -2.12084030843383 | -2.13247001246023 | -3.08487650874991 |
| C | 1.91583611046742  | -6.35072844032425  | 3.10692292080950  | C | -0.05267072936015 | -3.0138406392791  | -3.06910819083028 |
| C | 3.24374565154589  | -5.78992925320888  | 3.16174084511869  | C | -0.98536414081572 | -4.13952080395101 | -3.14580758838498 |
| C | 3.42864007718598  | -4.39735989659842  | 3.20597097346950  | C | -2.28627378738296 | -3.58792209658716 | -3.17248436170731 |
| C | -5.52934283068958 | -0.78651198957383  | 3.11132158665784  | C | 0.99567474107591  | 4.13482217071128  | -3.14948120612364 |
| C | -6.35779849143355 | -1.91868110433780  | 3.09252845941589  | C | 2.29657484745598  | 3.58297127372113  | -3.17177014353047 |
| C | -5.79713409564099 | -3.24665491806167  | 3.14710762198474  | C | 2.13076631517527  | 2.12776053662131  | -3.08172051013327 |
| C | -4.40466046888857 | -3.43163807664275  | 3.19377038637841  | C | 0.06258826289456  | 3.00935111805516  | -3.07369011910447 |
| C | 5.51930878468805  | 0.79064087095456   | 3.12743321121124  | C | -3.42714820116500 | -4.40318452359154 | -3.19909697555092 |
| C | 6.34782512195339  | 1.92277648893885   | 3.10938859024268  | C | -3.24161478438220 | -5.79563303572335 | -3.15326142224983 |
| C | 5.78702253458268  | 3.25085073121868   | 3.16004839681520  | C | -1.91342925769410 | -6.35583255854711 | -3.09909601575401 |
| C | 4.39441591624169  | 3.43592331463725   | 3.20225477968565  | C | -0.78160822325840 | -5.52689504847387 | -3.11673775841047 |
| C | -0.79364759295734 | 5.52648035998486   | 3.11521348192690  | C | -4.39551986538804 | 3.42998624266491  | -3.20699704867497 |
| C | -1.92579893177127 | 6.35491182513460   | 3.09446716894545  | C | -5.78806831792542 | 3.24451577163673  | -3.16450111779912 |
| C | -3.25389468630329 | 5.79417507465410   | 3.14523828097813  | C | -6.34844813428637 | 1.91632591962342  | -3.11225513086596 |
| C | -3.43895374340741 | 4.40165624090703   | 3.19013006277444  | C | -5.51956452449591 | 0.78443950338478  | -3.12897497731403 |
| C | 0.60559601710808  | -8.33517063978513  | 2.98781462076541  | C | 4.40571906029647  | -3.43484976324942 | -3.18862559262491 |
| C | 5.58818625207754  | -6.24393661990837  | 3.17768867882545  | C | 5.79812872381615  | -3.24942558969852 | -3.14182043583890 |
| C | 8.33248349125020  | 0.61222488837977   | 2.99706739801900  | C | 6.35839735356928  | -1.92123350686869 | -3.08851766207784 |
| C | 6.24102380944664  | 5.59529746561251   | 3.16800993707916  | C | 5.52964267229248  | -0.78930685684958 | -3.10900641980823 |
| C | -0.61517737677872 | 8.33935215682721   | 2.97958662320904  | C | 3.43769011731110  | 4.39787560841307  | -3.19765757859287 |
| C | -5.59838337510082 | 6.24802143531769   | 3.14964789683605  | C | 3.25241311671112  | 5.79040839753573  | -3.15465190250045 |
| C | -8.34189904385241 | -0.60821160443649  | 2.97079281339738  | C | 1.92424598678001  | 6.35096584948844  | -3.10368921640754 |
| C | -6.25100146971402 | -5.59112573736801  | 3.15694143604551  | C | 0.79221203551359  | 5.52230728634781  | -3.12274350383573 |
| C | -2.44806959259621 | -2.758472125186566 | 0.01439809618929  | C | -5.58587583869979 | -6.25051572360184 | -3.16477701269470 |
| C | -3.44840613174493 | -3.44848742102552  | -0.02120717606412 | C | -0.60214164064358 | -8.33948773992515 | -2.97891708462534 |
| C | -2.75836232704569 | -1.17011558277334  | -0.01434441816788 | C | 6.25283852780805  | -5.59376525536724 | -3.15137229865417 |
| C | -1.16975097446474 | -2.75843280814470  | 0.01012332722327  | C | 8.34217170920178  | -0.61012420212481 | -2.96820439545711 |
| C | 1.16941984695805  | 2.75879937890121   | 0.01049512096949  | C | 5.59683849778836  | 6.24460794478256  | -3.16137475039280 |
| C | 2.44755829850351  | 3.44923407630746   | 0.01874672540295  | C | 0.61342394530309  | 8.33532786936859  | -2.98946038083739 |
| C | 3.44817029820317  | 2.44912267217720   | -0.01227484795249 | C | -6.24272680198879 | 5.58882490504359  | -3.17458182665224 |
| C | 2.75824513070687  | 1.17060369971656   | -0.00664954366936 | C | -8.33261541072743 | 0.60517998783119  | -2.99858807687852 |
| C | 1.17026581856882  | -2.75811972772512  | -0.00624416035556 | H | -0.23812245957512 | -5.91980203191545 | 3.08177661597532  |
| C | 2.75851446410043  | -1.16935059404718  | 0.01576638108933  | H | 4.42723176234824  | -3.94330096144026 | 3.21330597172163  |
| C | 3.44885713010288  | -2.44757675014358  | 0.02428212233259  | H | -5.92672638547000 | 0.235300797550496 | 3.07042724341752  |
| C | 2.44873414490265  | -3.44808654176794  | -0.00990992996544 | H | -3.95069493635433 | -4.43027176681032 | 3.20091723067508  |
| C | -3.44906778039671 | 2.44806938240598   | 0.00880143168717  | H | 5.91686821616571  | -0.23122487270944 | 3.08966622821295  |
| C | -2.44881869971720 | 3.44847738099930   | -0.02390018522012 | H | 3.94039937053811  | 4.43455365393373  | 3.20662062291129  |
| C | -1.17042926155501 | 2.75845689540716   | -0.01471368328362 | H | 0.22823649384201  | 5.92395480293121  | 3.07700323307574  |
| C | -2.75872322134153 | 1.16980924231232   | 0.00464180031185  | H | -4.43758522667836 | 3.94765365049598  | 3.19446412976773  |
| C | 2.77590201054988  | -4.81179517151367  | -0.04349758199752 | H | 0.02834525677932  | -8.11620431666669 | 3.91280442590210  |
| C | 4.13363089639762  | -5.15386593538388  | -0.02225048630606 | H | 0.00345011638271  | -8.01547157617602 | 2.10780217119502  |
| C | 5.15516892787553  | -4.13183933468338  | 0.04417520804513  | H | 0.79433557821466  | -9.42238738638155 | 2.92576974124724  |
| C | 4.81259348565360  | -2.77418627538934  | 0.06172666854613  | H | 5.76749210091215  | -5.60817211838524 | 4.07170223978047  |
| C | -4.81202270461700 | -2.77545359999530  | -0.05975975599745 | H | 5.85815327199425  | -5.68824289687904 | 2.25546250481680  |
| C | -5.15431612583686 | -4.13314646296001  | -0.04068028660764 | H | 6.21675120312504  | -7.15021180347913 | 3.24517047662011  |
| C | -4.13265848300031 | -5.15479575433595  | 0.02941520066502  | H | 9.41978309059706  | 0.80082754309106  | 2.93609419251301  |
| C | -2.77498306915365 | -4.81242825353131  | 0.05063370435397  | H | 8.01424377111864  | 0.00748496402010  | 2.11757194755339  |
| C | 4.81183469525784  | 2.77643274882417   | -0.04649529586892 | H | 8.11202633940432  | 0.03759097294131  | 3.92333144208465  |
| C | 5.15373353999497  | 4.13426070744546   | -0.02727709380651 | H | 7.14725048924514  | 6.22412016419820  | 3.23373724968752  |
| C | 4.13162706711176  | 5.15571054311843   | 0.03904137528520  | H | 5.68584133136486  | 5.86194199760144  | 2.24451368957059  |
| C | 2.77401584456291  | 4.81300220582106   | 0.05578032875460  | H | 5.60473208738728  | 5.77778021243347  | 4.06100670500749  |
| C | -2.77580906892844 | 4.81211297996332   | -0.06163550017719 | H | -0.80369754529409 | 9.42653146786106  | 2.91625780820521  |
| C | -4.13357508097791 | 5.15430178666614   | -0.04498592108841 | H | -0.00963369908994 | 8.01930783477635  | 2.10130130891933  |
| C | -5.15528125990769 | 4.13251677138230   | 0.02226925722859  | H | -0.04142988826617 | 8.12072681309436  | 3.90683060240213  |
| C | -4.81285199867107 | 2.77486238859907   | 0.04269744244570  | H | -6.22734683220059 | 7.15434582730277  | 3.21259664055449  |

|   |                   |                   |                   |   |                   |                   |                   |
|---|-------------------|-------------------|-------------------|---|-------------------|-------------------|-------------------|
| H | -5.86380412636274 | 5.69082078151925  | 2.22699669111890  | H | 5.86313250236014  | 5.68881451706872  | -2.23811973335002 |
| H | -5.78199239705689 | 5.61366456419412  | 4.04379425203563  | H | 0.80188876471907  | 9.42259212204537  | -2.92732362802212 |
| H | -8.12472660119481 | -0.03183165207996 | 3.89674552841500  | H | 0.03890406072239  | 8.11586431608647  | -3.91602520179818 |
| H | -8.02032977204965 | -0.00531499160181 | 2.09125399598687  | H | 0.00873291322720  | 8.01614280142929  | -2.11027746054356 |
| H | -9.42900729752119 | -0.79677930863385 | 2.90637937351832  | H | -5.68767004941778 | 5.85649707179049  | -2.25129273730639 |
| H | -5.61733060889525 | -5.77245609081077 | 4.05203656558040  | H | -5.60643814625566 | 5.77064055915203  | -4.06771574939725 |
| H | -5.69309814837425 | -5.85889474917827 | 2.23539079146033  | H | -7.14912356735839 | 6.21733181513420  | -3.24097682402508 |
| H | -7.15737448996884 | -6.21992558500557 | 3.22082425679948  | H | -8.01412932037958 | 0.00163892053174  | -2.11836746519898 |
| H | 1.98014588357510  | -5.56556026563162 | -0.06283776634459 | H | -8.11198563112466 | 0.02955883349056  | -3.92419855496154 |
| H | 5.56603093297909  | -1.97811337035074 | 0.08105755409448  | H | -9.41999736172209 | 0.79343427268214  | -2.93796240493479 |
| H | -5.56557932865709 | -1.97959733410751 | -0.08320729346259 | N | -1.83751354171408 | -0.77585940619115 | 2.96713432450560  |
| H | -1.97910063060697 | -5.56595207460810 | 0.07425149338539  | N | 1.82791488702997  | 0.77986394245617  | 2.97215187991449  |
| H | 5.56568792984983  | 1.98077788771272  | -0.06705923657693 | N | 0.77300844556361  | -1.83070559505062 | 2.97203576184419  |
| H | 1.97789103538206  | 5.56634947246109  | 0.07682104304441  | N | -0.78264709271692 | 1.83479347173076  | 2.96713749074573  |
| H | -1.97997484988122 | 5.56574684508069  | -0.08343637380237 | N | -1.27493836867075 | -3.14575171363266 | 3.10496326931634  |
| H | -5.56637611447356 | 1.97892581628123  | 0.06438116384576  | N | -3.15279623461623 | 1.27200995689813  | 3.09947088228673  |
| H | 3.11084244789093  | -7.54171086245198 | 0.87919634598165  | N | 1.26494135397597  | 3.14991835765504  | 3.10533352830380  |
| H | 2.98329646329998  | -7.42310208864933 | -0.93351198531045 | N | 3.14276430352912  | -1.26785090812467 | 3.11095474039338  |
| H | 4.28340121080122  | -8.42047946046866 | -0.16956148660304 | N | -1.37584284000393 | -1.37594105177884 | -0.00155454270169 |
| H | 7.42221093854590  | -2.97889775466749 | 0.95768736485575  | N | 1.37567080152732  | 1.37631495397376  | 0.00137377246920  |
| H | 7.54436425121999  | -3.10993817945464 | -0.85452770549013 | N | 1.37603879667863  | -1.37556388604953 | 0.00344810485980  |
| H | 8.42154496466552  | -4.28012179535895 | 0.19822074462350  | N | -1.37621570817725 | 1.37592539457156  | -0.00369188976261 |
| H | 8.42070852104025  | 4.28406284769458  | -0.16597759333218 | N | 0.00033756145162  | -3.39190284621035 | 0.00238505178709  |
| H | 7.42539010110518  | 2.98333491876620  | -0.93157094814053 | N | -3.39216113956360 | -0.00023341681412 | -0.00591353108094 |
| H | 7.53911653262740  | 3.11228983097128  | 0.88134307246871  | N | -0.00059347853811 | 3.39224004937595  | -0.00257887560739 |
| H | 4.27916109799164  | 8.42257865413243  | 0.18296813518356  | N | 3.39200258142485  | 0.00071163575340  | 0.00561907719589  |
| H | 3.10930614706532  | 7.54197326118224  | -0.86729484255190 | N | -1.82818026092002 | 0.77505436183444  | -2.97348272088104 |
| H | 2.97806922389928  | 7.42524001664225  | 0.94528262970246  | N | 1.83776723615217  | -0.77948791050237 | -2.96601373975870 |
| H | -4.28243505568869 | 8.42111340918532  | -0.18837633895466 | N | -0.77246203273588 | -1.83516590004530 | -2.96959934633274 |
| H | -2.98108064438676 | 7.42441933611860  | -0.95111738091698 | N | 0.78201307483352  | 1.83080049381709  | -2.96988283381346 |
| H | -3.11205038764457 | 7.54070169087590  | 0.86149384391385  | N | -3.14239008727848 | -1.27328678255032 | -3.10935846676809 |
| H | -8.42234827758529 | -4.28104824527704 | 0.16023441277368  | N | -1.26594366582212 | 3.14513355569869  | -3.10987516326578 |
| H | -7.54011378943229 | 3.10862506486357  | -0.88579347615239 | N | 3.15239413651251  | 1.26853807967622  | -3.10131363020619 |
| H | -7.42661075876960 | 2.98150438302812  | 0.92728350164230  | N | 1.27593677106507  | -3.14971491157861 | -3.10072582865632 |
| H | -7.54243367931874 | -3.10971535810840 | 0.85925767283217  | O | 1.87827379566249  | -7.70868543400219 | 3.00844380073608  |
| H | -7.42269941579921 | -2.98235492238269 | -0.95338054214876 | O | 4.24129869455656  | -6.70491818001335 | 3.13309853572508  |
| H | -8.42087551823079 | -4.28215534942682 | -0.18993499477913 | O | 7.70591931391707  | 1.88492161598083  | 3.01298584685341  |
| H | -2.98284402076287 | -7.42422121667768 | 0.94069589947337  | O | 6.70204517494829  | 4.24827636920609  | 3.12850032244140  |
| H | -3.10814022974792 | -7.54178140208977 | -0.87222920526242 | O | -1.88789759770024 | 7.71282966686124  | 2.99556101773970  |
| H | -4.28173845675213 | -8.42152572674344 | 0.17456455182044  | O | -4.25133935929243 | 6.70907102216685  | 3.11089202018374  |
| H | -4.42595318944148 | -3.94958718204723 | -3.20576205195663 | O | -7.71556869880999 | -1.88096816580915 | 2.99152897187643  |
| H | 0.24035983711599  | -5.92391194825531 | -3.07623544510280 | O | -6.71201020400223 | -4.24417982253110 | 3.11439631895198  |
| H | -3.94181883421353 | 4.42875359738303  | -3.21239615099111 | O | 4.61466015110945  | -6.42196321720468 | -0.06558009463733 |
| H | -5.91677087896672 | -0.23750022211135 | -3.08953935204964 | O | 6.42334603158082  | -4.61232390979788 | 0.09107022320704  |
| H | 3.95203999167046  | -4.43361918987415 | -3.19460987287553 | O | 6.42190763584168  | 4.61533829002798  | -0.06764337588478 |
| H | 5.92672181829989  | 0.23265791188358  | -3.06894435864206 | O | 4.61183386092625  | 6.42413446486957  | 0.08191394895710  |
| H | 4.43639460285296  | 3.94402989376394  | -3.20207288771158 | O | -4.61430730696374 | 6.42252546359183  | -0.08768291373242 |
| H | -0.22971499414857 | 5.91967933652546  | -3.08460392459476 | O | -6.42367072196838 | 4.61308562383837  | 0.06189162366253  |
| H | -5.85442418482038 | -5.69351893679052 | -2.24291691730951 | O | -6.42249112880592 | -4.61389740762860 | -0.08477195589124 |
| H | -5.76694304411466 | -5.61615045808776 | -4.05942510105167 | O | -4.61341439366557 | -6.42303646634689 | 0.07140252597503  |
| H | -6.21424508420189 | -7.15710650266346 | -3.22980071654405 | O | -4.23876167150913 | -6.71096318266614 | -3.12180162556985 |
| H | 0.00045059640749  | -8.01843770208554 | -2.09898226444060 | O | -1.87516244892051 | -7.71367984842567 | -2.99935257641107 |
| H | -0.02567380152953 | -8.12125746160904 | -3.90456753772481 | O | 6.71334334885639  | -4.24663916414244 | -3.10892901555586 |
| H | -0.79026181050761 | -9.42673190716959 | -2.91550010758877 | O | 7.71614818879579  | -1.88305050054864 | -2.98741326206011 |
| H | 7.15946486795214  | -6.22223786059244 | -3.21486048787652 | O | 0.24974219978191  | 6.70550295116139  | -3.12218308922421 |
| H | 5.61951075088484  | -5.77548787028553 | -4.04663120108202 | O | 1.88621337732488  | 7.70896544581347  | -3.00596743338309 |
| H | 5.69478530841072  | -5.86160144308770 | -2.22995122996711 | O | -6.70337404763072 | 4.24170809088065  | -3.13382295829828 |
| H | 9.42931102658952  | -0.79837293870582 | -2.90331687014941 | O | -7.70655111407756 | 1.87810847316566  | -3.01606437520897 |
| H | 8.12501255428390  | -0.03492240462846 | -3.89488652231329 | Y | -0.00273682023057 | 0.00126554023734  | 1.72939651195519  |
| H | 8.02043625760984  | -0.00626314127221 | -2.08938795361247 | Y | 0.00268504273743  | -0.00111223810846 | -1.72954043135653 |
| H | 6.22560467722805  | 7.15093880364704  | -3.22617741282064 |   |                   |                   |                   |
| H | 5.77979396234424  | 5.60898596337030  | -4.05475479398838 |   |                   |                   |                   |

Table S12. BP86/def2-SVP geometry of  $g\text{-Y}_2(\text{MeO})_8\text{Pc}]_3^{2+}$ .

|   |                   |                   |                   |   |                   |                   |                   |
|---|-------------------|-------------------|-------------------|---|-------------------|-------------------|-------------------|
| C | -3.56750422018571 | -2.32670458191115 | 3.15690162275630  | C | 3.65654155238401  | -7.52755640529150 | -0.05233839753208 |
| C | -4.13142151561971 | -1.03124934224620 | 3.13712945301336  | C | 7.48390847978582  | -3.71771498500887 | 0.07615230009563  |
| C | -3.01584378577745 | -0.08793771969421 | 3.05346553797831  | C | 7.52742192153147  | 3.65671205604012  | -0.05093774546840 |
| C | -2.11253363656363 | -2.14576152575021 | 3.06502649661235  | C | 3.71715917437818  | 7.48426383133310  | 0.06193821863629  |
| C | 2.10310104640010  | 2.14937081432531  | 3.06854968522292  | C | -3.65686014803047 | 7.52742208064878  | -0.07006053966794 |
| C | 3.55780058911380  | 2.33044651638627  | 3.16439547179509  | C | -7.48444764375666 | 3.71738442597561  | 0.04597251840833  |
| C | 4.12170401569190  | 1.03493932868932  | 3.14865953972204  | C | -7.52758473237880 | -3.65650252013376 | -0.07277802024289 |
| C | 3.00634617099992  | 0.09155038977363  | 3.06306709607326  | C | -3.71810578401865 | -7.48405497187007 | 0.06000040011091  |
| C | 0.08504041864219  | -3.00930165641712 | 3.06066150272095  | C | -4.12941231428714 | 1.00333438743256  | -3.15299425673622 |
| C | 2.14281901771002  | -2.10598352032161 | 3.07180475873534  | C | -3.57248987173221 | 2.30206067228600  | -3.17238733253888 |
| C | 2.32370760234787  | -3.56071966478365 | 3.16717543203042  | C | -2.11592823699065 | 2.13089803946802  | -3.08068052215194 |
| C | 1.02828004761436  | -4.12469333555218 | 3.14775980578879  | C | -3.00752448604377 | 0.06827035432966  | -3.07117517209013 |
| C | -2.33345434567758 | 3.56465346901223  | 3.15356135828064  | C | 3.01709972319321  | -0.07206335248537 | -3.06126155278594 |
| C | -1.03787543013148 | 4.12841757143931  | 3.13805325219536  | C | 4.13925008053560  | -1.00722350122013 | -3.13806502147575 |
| C | -0.09446495559293 | 3.01283960818546  | 3.05607436816599  | C | 3.58242580252094  | -2.30599544262349 | -3.15741882148334 |
| C | -2.15236648408186 | 2.10968616185635  | 3.06139954857245  | C | 2.12555143272188  | -2.13472500082135 | -3.07064665997395 |
| C | 0.83507349562700  | -5.51334265847123 | 3.14293831245233  | C | -2.12797758522579 | -2.12262713389802 | -3.07771364850670 |
| C | 1.97436846302283  | -6.33422132535432 | 3.13782481904013  | C | -0.06537836195564 | -3.01422499918566 | -3.06416899137487 |
| C | 3.29867464086150  | -5.76075695196475 | 3.17598812854838  | C | -1.00038381422450 | -4.13629735746027 | -3.14418548368567 |
| C | 3.47212961532843  | -4.36351504103949 | 3.20312096895908  | C | -2.29908098138442 | -3.57940658197898 | -3.16615083582710 |
| C | -5.52004477904839 | -0.83798367622873 | 3.12919042923762  | C | 1.01017536551010  | 4.13240447762386  | -3.14658183014375 |
| C | -6.34093727437525 | -1.97723919629018 | 3.12123403437533  | C | 2.30896388522316  | 3.57553443719196  | -3.16339720862609 |
| C | -5.76759778983109 | -3.30159449564219 | 3.15970299271894  | C | 2.13760517461923  | 2.11885728210290  | -3.07359895808141 |
| C | -4.37043149560101 | -3.47512267402327 | 3.19000978816028  | C | 0.07494377318240  | 3.01043748053258  | -3.06812041640762 |
| C | 5.51033662426422  | 0.84161159552616  | 3.14558256795506  | C | -3.44380026726685 | -4.38518873775063 | -3.19709508579390 |
| C | 6.33130488198793  | 1.98081836963007  | 3.13817471941384  | C | -3.26527081695286 | -5.78198220382070 | -3.15980721654606 |
| C | 5.75792216269701  | 3.30526986479875  | 3.17227272557436  | C | -1.93850148424725 | -6.35028357044234 | -3.11362160696756 |
| C | 4.36066283127069  | 3.47890847032090  | 3.19779040117292  | C | -0.80261806223822 | -5.52528391554570 | -3.12773932079172 |
| C | -0.84436347868363 | 5.51700706089584  | 3.13201939379195  | C | -4.37817967236089 | 3.44682185441346  | -3.20394780211684 |
| C | -1.98344041354086 | 6.33808445957986  | 3.12130580867938  | C | -5.77505772177440 | 3.26826705007478  | -3.17014297848844 |
| C | -3.30800501294293 | 5.76492927865019  | 3.15503180878351  | C | -6.34346313119128 | 1.94144137380680  | -3.12687808582622 |
| C | -3.48185791970441 | 4.36774704384986  | 3.18357635430145  | C | -5.51843634507350 | 0.80556818898409  | -3.14023321556067 |
| C | 0.68601341256576  | -8.33991960673640 | 3.10134997418342  | C | 4.38829205414965  | -3.45074432210062 | -3.18479782644487 |
| C | 5.64760068504067  | -6.20264039658629 | 3.19407830301016  | C | 5.78504401968317  | -3.27205106823700 | -3.14677323397426 |
| C | 8.33689073727663  | 0.69215394590475  | 3.10749835182279  | C | 6.35324750902125  | -1.94513949309406 | -3.10347961263001 |
| C | 6.20007096170344  | 5.65418417478949  | 3.18451598385368  | C | 5.52821215640452  | -0.80934661959005 | -3.12104139812504 |
| C | -0.69443405858242 | 8.34339337584697  | 3.08811376435423  | C | 3.45375999567603  | 4.38130741943733  | -3.19143742921783 |
| C | -5.65686854836864 | 6.20740870943969  | 3.16337478458131  | C | 3.27506257680771  | 5.77814455852900  | -3.15665935956488 |
| C | -8.34649122925048 | -0.68878043122488 | 3.08122682939849  | C | 1.94811204505136  | 6.34645277754094  | -3.11593712395031 |
| C | -6.20959366806797 | -5.65052225821373 | 3.17497218243794  | C | 0.81231754681654  | 5.52140489670741  | -3.13283678780417 |
| C | -4.6904318682496  | -3.43305029471991 | 0.00681486974848  | C | -5.61375073493996 | -6.22789884831239 | -3.19864270819569 |
| C | -3.46578803361306 | -2.42602710693274 | -0.02449477071178 | C | -0.64448697567046 | -8.35137738914378 | -3.05618109916885 |
| C | -2.76690379736825 | -1.15400384033026 | -0.01914852728705 | C | 6.23110058090643  | -5.62059138827241 | -3.17949311949582 |
| C | -1.18671743879522 | -2.74989189913662 | 0.00295675561723  | C | 8.35417812825843  | -0.65085403378374 | -3.04686922272317 |
| C | 1.18645253004952  | 2.74994411386856  | 0.00405355318307  | C | 5.62364862350771  | 6.22409505573897  | -3.18749214591284 |
| C | 2.46872895871927  | 3.433122994192290 | 0.01172253179703  | C | 0.65377721882282  | 8.34750919471819  | -3.06525539255140 |
| C | 3.46560993164500  | 2.42611020620258  | -0.01557507622663 | C | -6.22082361234428 | 5.61680319814025  | -3.20669127387538 |
| C | 2.76676157700268  | 1.15403947031823  | -0.01136320243222 | C | -8.34466548381318 | 0.64733724077881  | -3.07553793525350 |
| C | 1.15392267427993  | -2.76682800515392 | -0.01179301881221 | H | -0.18265499075290 | -5.92215968880067 | 3.11668023464421  |
| C | 2.74981571387895  | -1.18657766355821 | 0.00870779515508  | H | 4.46761626721019  | -3.90279365304923 | 3.21216844133785  |
| C | 3.43296160761473  | -2.46888767951359 | 0.01631813804148  | H | -5.92872402528828 | 0.17979695924674  | 3.10277480556587  |
| C | 2.42597132705139  | -3.46570455845555 | -0.01413250622914 | H | -3.90980456831235 | -4.47064913921071 | 3.19937947256554  |
| C | -3.43322412125201 | 2.46885723504578  | 0.00239827496387  | H | 5.91911797749267  | -0.17620778422127 | 3.12241324988443  |
| C | -2.42618571129099 | 3.46569038792851  | -0.02554450731944 | H | 3.90001324821209  | 4.47445243829325  | 3.20385017353117  |
| C | -1.15412495589877 | 2.76684025153986  | -0.01861655227740 | H | 0.17355205626637  | 5.92556733894801  | 3.10912135488518  |
| C | -2.75001659712810 | 1.18658123343450  | -0.00157197307950 | H | -4.47748385660733 | 3.90727386932255  | 3.18954422303991  |
| C | 2.74805258369398  | -4.83148187109782 | -0.04631027095646 | H | 0.13160237403528  | -8.09833038729374 | 4.03377445993038  |
| C | 4.10500525111404  | -5.17904956073832 | -0.02947015207380 | H | 0.05898096344767  | -8.06211999130143 | 2.24442221322730  |
| C | 5.13327575777224  | -4.1754306846154  | 0.02708521770560  | H | 0.89534505492459  | -9.42424555714942 | 3.07227839047385  |
| C | 4.79451743617696  | -2.59749771990847 | 0.0486055905460   | H | 5.82518723413617  | -5.55654862651291 | 4.08009569277303  |
| C | -4.83151315050823 | -2.74802487207436 | -0.05953986256499 | H | 5.91189170689485  | -5.65977438318363 | 2.26296972434027  |
| C | -5.17913147290639 | -4.10498842374503 | -0.04492795875794 | H | 6.27547411014568  | -7.10788255054822 | 3.27259967300404  |
| C | -4.15772593743274 | -5.13335637815410 | 0.01182739710301  | H | 9.42127292797718  | 0.90126632003749  | 3.07896350950795  |
| C | -2.79772099897415 | -4.79465243415985 | 0.03650872828249  | H | 8.05986550165388  | 0.06286291999961  | 2.23194713782092  |
| C | 4.83142099365337  | 2.74818581417467  | -0.04623742121504 | H | 8.09428491931119  | 0.14023804507581  | 4.041139225807255 |
| C | 5.17891684403108  | 4.10519490929054  | -0.03219393859391 | H | 7.10533461105043  | 6.28215241593207  | 3.26203335637361  |
| C | 4.15727750888007  | 5.13356191736871  | 0.01994439412170  | H | 5.65790244167412  | 5.91609072778770  | 2.25234143202814  |
| C | 2.79723706917523  | 4.79477634903320  | 0.04071624078885  | H | 5.55338038195848  | 5.83417858972239  | 4.06961147433543  |
| C | -2.74823050707091 | 4.83144308731293  | -0.05918542546002 | H | -0.90332362590887 | 9.42774470614450  | 3.05688556793448  |
| C | -4.10526641798240 | 5.17894198347431  | -0.04725230193897 | H | -0.06392649500858 | 8.06433355841140  | 2.21407708568987  |
| C | -5.13367944868157 | 4.15738616232486  | 0.00564413892172  | H | -0.14389339587204 | 8.10276107399793  | 4.02307762819529  |
| C | -4.79490742460785 | 2.79739498779771  | 0.02937338356302  | H | -6.28481965857852 | 7.11294022592133  | 3.23783220704504  |

|   |                   |                   |                    |   |                   |                   |                   |
|---|-------------------|-------------------|--------------------|---|-------------------|-------------------|-------------------|
| H | -5.91764178661600 | 5.66296350692233  | 2.23221674099818   | H | 5.89843894670119  | 5.66981041852149  | -2.26624189362182 |
| H | -5.83809195746171 | 5.56293373107643  | 4.04983622347951   | H | 0.85905184606732  | 9.43221572991393  | -3.02395704464407 |
| H | -8.10710294621230 | -0.13524343891371 | 4.01473899745966   | H | 0.10357810504929  | 8.11381308527166  | -4.00223437513151 |
| H | -8.06656958191715 | -0.06094306687643 | 2.20554769337035   | H | 0.02410121629136  | 8.05839511936746  | -2.19378226580451 |
| H | -9.43075486465725 | -0.89803223855870 | 3.04937007586694   | H | -5.66745656287633 | 5.89362494660936  | -2.28549519451829 |
| H | -5.56566366880200 | -5.82884549476788 | 4.06241648598509   | H | -5.58551716928203 | 5.78405936019426  | -4.10227928605408 |
| H | -5.66447755878534 | -5.91409479955955 | 2.24497523031326   | H | -7.12843283044875 | 6.24153217403731  | -3.28210660649024 |
| H | -7.11504528401712 | -6.27842472244994 | 3.25079108778500   | H | -8.05667845573126 | 0.01964915599116  | -2.20226359770184 |
| H | 1.95147433046799  | -5.58440551544038 | -0.06423605192406  | H | -8.10986032456520 | 0.09494986098923  | -4.01095080841549 |
| H | 5.55121028947631  | -2.00444404821988 | 0.06796928931609   | H | -9.42940585375429 | 0.85279045150701  | -3.03606684235108 |
| H | -5.58439513459770 | -1.95140276652727 | -0.07713708729114  | N | -1.82774819664953 | -0.79529629369947 | 2.95019781622378  |
| H | -2.00469864267191 | -5.55138414775870 | 0.05552623417782   | N | 1.81859799873533  | 0.79875379053187  | 2.95499952227760  |
| H | 5.58441116257180  | 1.95160205368247  | -0.06079390093698  | N | 0.79246292710729  | -1.82145800347373 | 2.95514303674090  |
| H | 2.00413101395466  | 5.55149742444306  | 0.05640109582209   | N | -0.80162020004047 | 1.82487072706874  | 2.95005024268804  |
| H | -1.95163555684501 | 5.58441328175193  | -0.07416532767846  | N | -1.24202546027389 | -3.15884138055444 | 3.09090721694828  |
| H | -5.55162630228582 | 2.00430154752536  | 0.04580386034854   | N | -3.16548755060638 | 1.23912945507074  | 3.08417203803432  |
| H | 3.09625494543322  | -7.56341874153410 | 0.90442023874191   | N | 1.23250070539151  | 3.16244595431982  | 3.09024837950245  |
| H | 2.95129388590769  | -7.46190259196888 | -0.90934903058358  | N | 3.15586532530879  | -1.23542832788478 | 3.09654091257255  |
| H | 4.26361852534014  | -8.44510544243424 | -0.14795912014843  | N | -1.38567022438210 | -1.36542161408395 | -0.00939335479010 |
| H | 7.41156221854096  | -3.02991142423571 | 0.94636765129950   | N | 1.38550041390406  | 1.36546753564048  | -0.00626729425631 |
| H | 7.53206450527609  | -3.13893887948296 | -0.86873047244008  | N | 1.36536070379265  | -1.38557121947159 | -0.0046992238506  |
| H | 8.39747418125032  | -7.52982603890382 | 0.16851160965824   | N | -1.36553069086562 | 1.38559162221752  | -0.01091448109335 |
| H | 8.44511053251984  | 4.26351273610616  | -0.14697020921738  | N | -0.02324996104539 | -3.39189618463520 | -0.00338678382413 |
| H | 7.46290311002091  | 2.94913635380325  | -0.90611935490502  | N | -3.39200087975848 | 0.02313485268112  | -0.01060918855504 |
| H | 7.56194874547448  | 3.09904004449424  | 0.90738647013392   | N | 0.02300386414023  | 3.39192927920270  | -0.00677043694475 |
| H | 4.33040486867682  | 8.39813195055002  | 0.15279746563796   | N | 3.39182263006067  | -0.02311457549574 | 0.00044041457666  |
| H | 3.13986001385704  | 7.52982603890382  | -0.88397978434570  | N | -1.82437407003752 | 0.78060184759619  | -2.96689742867947 |
| H | 3.02800926365661  | 7.41420902267006  | 0.93128239540642   | N | 1.83361400697794  | -0.78426892770433 | -2.95980933161861 |
| H | -4.26359332280892 | 8.44491113515780  | -0.16840327780222  | N | -0.77777403109796 | -1.83080681534333 | -2.96340560610059 |
| H | -2.94842214235401 | 7.46134778482668  | -0.92441103145499  | N | 0.78705155209118  | 1.82718881978718  | -2.96331871985685 |
| H | -3.10013068779555 | 7.56372072048821  | 0.88873944398332   | N | -3.14661694034002 | -1.26231588751936 | -3.10232559572071 |
| H | -8.39838573438512 | 4.33083765418116  | 0.13469951293270   | N | -1.25556141558358 | 1.25552052876444  | -3.10236072865933 |
| H | -7.52905603728715 | 3.13831481475363  | -0.89891090816175  | N | 3.15630079953768  | 1.25848562292574  | -3.09377970923316 |
| H | -7.41534996490913 | 3.02988662695770  | 0.91669459893480   | N | 1.26524288285573  | -3.15341746696234 | -3.09366788009344 |
| H | -7.56564699349577 | -3.09741680791599 | 0.88459237194944   | O | 1.94963193911232  | -7.68898482494085 | 3.06739317525959  |
| H | -7.45996449687500 | -2.95016305055211 | -0.92873090560377  | O | 4.29866366866962  | -6.66530420756708 | 3.15515512037719  |
| H | -8.44490804063250 | -4.26345735637945 | -0.17129112566886  | O | 7.68615567031208  | 1.95576098560501  | 3.06952303626321  |
| H | -3.03183031136316 | -7.41242161564029 | 0.93147760835872   | O | 6.66259595722502  | 4.30510020594862  | 3.14946320287386  |
| H | -3.13769277923879 | -7.53156071036650 | -0.88390986229869  | O | -1.95809537719966 | 7.69278053402890  | 3.04978546701881  |
| H | -4.33180129902733 | -8.39764614201937 | 0.15059309109216   | O | -4.30768652421226 | 6.66967874833396  | 3.12891408272688  |
| H | -4.44063570705192 | -3.92744912731478 | -3.209079562611632 | O | -7.69553180462815 | -1.95239662151962 | 3.04766766016154  |
| H | 0.21639408625284  | -5.93066962002525 | -3.09818021251061  | O | -6.67212462972986 | -4.30153930093331 | 3.13601110952580  |
| H | -3.92038040768331 | 4.44365476414352  | -3.21380238588151  | O | 4.58391644743263  | -6.44280852985188 | -0.06418981723391 |
| H | -5.92394848990269 | -0.21345818029253 | -3.11298399020233  | O | 6.39451767268384  | -4.64085849678568 | 0.05973824379929  |
| H | 3.93064118516765  | -4.44764345891041 | -3.19471671308323  | O | 6.44270123627616  | 4.58405944074047  | -0.06674506993846 |
| H | 5.93352642626676  | 0.20976506642607  | -3.09397533097783  | O | 4.64043291106968  | 6.39492598136110  | 0.04987676776159  |
| H | 4.45064873795912  | 3.92359303025983  | -3.19941631544828  | O | -4.58413929946499 | 6.44263858753060  | -0.08478580199847 |
| H | -0.20679662003628 | 5.92683890478687  | -3.10770591487995  | O | -6.39507354857339 | 4.64060131217464  | 0.03331675685697  |
| H | -5.89181864799058 | -5.67234599873082 | -2.27914900236209  | O | -6.44280399891381 | -4.58385256809879 | -0.08330487581008 |
| H | -5.77982573503421 | -5.59473288255844 | -4.09596387184605  | O | -6.44115345188946 | -6.39460063155839 | 0.04276562348015  |
| H | -6.23835762768234 | -7.13570109719839 | -3.27273125784748  | O | -4.26368506708263 | -6.68750087081155 | -3.13618327160831 |
| H | -0.01771697554012 | -8.06141274276891 | -2.18290310316494  | O | -1.91004074469652 | -7.70434215920302 | -3.02923227891342 |
| H | -0.09110028690947 | -8.11871933285996 | -3.99153912039940  | O | 6.69059473434329  | -4.27035297198290 | -3.12003449340648 |
| H | -0.85000346152081 | -9.43602119455852 | -3.01444413079175  | O | 7.70721284887011  | -1.91639642793361 | -3.01763290399150 |
| H | 7.13898727161966  | -6.24533534672185 | -3.25134934343505  | O | 4.27334739834799  | 6.68372498291786  | -3.13053088426554 |
| H | 5.59863046799066  | -5.78892000342148 | -4.07688680331097  | O | 1.91929470083041  | 7.70062028852439  | -3.0332396821831  |
| H | 5.67484699676181  | -5.89641022447961 | -2.25974024433111  | O | -6.68060342986468 | 4.26666285129965  | -3.14715188799544 |
| H | 9.43878768388500  | -0.85617311806401 | -3.00329965789839  | O | -7.69772175625739 | 1.91287749339255  | -3.04575028403137 |
| H | 8.12260963567138  | -0.09976163805995 | -3.98385088257062  | Y | -0.00258878516059 | 0.00093161144383  | 1.71704850037764  |
| H | 8.06309699242998  | -0.02199878613894 | -2.17545746266721  | Y | 0.00259307326562  | -0.00093557933189 | -1.72518546187440 |
| H | 6.24848052932904  | 7.13182239586432  | -3.26059166685023  |   |                   |                   |                   |
| H | 5.79296684540620  | 5.58970730865360  | -4.08334549029072  |   |                   |                   |                   |
